# Supplementary material for: Transcriptional regulation of neural stem cell expansion in the adult hippocampus
Source: eLife. 2022 Jan 4;11:e72195. doi: 10.7554/eLife.72195 (PMC8820733; doi:10.7554/eLife.72195)
Supplement: Supplementary file 1. — DEGs were defined by at least 1.2-fold change with FDR < 0.05. [file elife-72195-supp1.xls]

## Sheet: batch12_allSamples_0.05pval_1.2
Row.names	YTa22-6_KO	YTa22-7_KO	YTa32-5_KO	YTa22-3_WT	YTa22-8_WT	YTa32-6_WT	logFC	logCPM	LR	PValue	FDR
Rps2-ps13	6.40778	8.14571	0.0463222	0.0568705	0.0339857	0.0724999	-6.51534	1.43027	110.385	8.07e-26	1.21e-21
Gdpd3	0.10554	0.0574991	0	3.07101	2.68487	0.0362499	5.08664	0.209782	69.55	7.45e-17	5.59e-13
Gm11645	0.10554	0.114998	0.0926444	1.70612	2.05613	0.543749	3.82591	-0.185355	49.894	1.62e-12	8.12e-09
Rplp0-ps1	0.0753856	0.153331	0.0463222	1.91464	4.01031	0.145	4.46195	0.285721	48.6432	3.07e-12	1.15e-08
Calml4	0.271388	0.344995	1.38967	1.45968	2.19208	9.31623	2.60606	1.20987	47.5175	5.45e-12	1.36e-08
Sostdc1	0.919705	1.14998	7.64316	2.72979	10.4676	59.6674	2.74479	3.66237	47.7437	4.86e-12	1.36e-08
Ttr	4.52314	6.74657	355.986	102.102	640.426	2521.73	5.04065	9.13543	44.0365	3.22e-11	6.92e-08
Krt18	0.0753856	0.0766655	2.40875	0.492878	3.14368	22.33	3.93958	2.09527	40.8762	1.62e-10	3.04e-07
Fcgr1	5.18653	13.9531	22.8368	0.436008	0.4758	7.17749	-3.49305	3.0159	40.4762	1.99e-10	3.32e-07
1110059M19Rik	0.0301543	0.0383328	1.06541	0.36018	1.95418	10.295	4.13757	1.03624	38.2247	6.31e-10	9.47e-07
Kcnj13	11.0666	8.24154	20.7523	17.8194	21.9887	83.4474	1.34525	4.69833	35.5564	2.48e-09	3.38e-06
Hist1h2al	5.36746	13.7231	18.5289	0.208525	0.11895	5.58249	-4.51537	2.82223	34.6332	3.98e-09	4.98e-06
Otx2	0.301543	0.134165	1.29702	0.66349	1.63131	12.9775	2.69473	1.34484	34.0509	5.37e-09	6.2e-06
Folr1	0.21108	0.249163	5.88292	0.492878	4.91093	52.3449	3.36397	3.26741	32.5094	1.19e-08	1.27e-05
Rps13-ps1	0.241234	0.191664	0.231611	12.4167	7.68076	0.25375	4.3717	1.93312	32.1232	1.45e-08	1.45e-05
Kcne2	0.0452314	0.0958319	2.40875	0.227482	4.12926	30.0149	4.37181	2.46874	31.3209	2.19e-08	2.05e-05
Clic6	1.10063	1.64831	12.4143	1.91464	7.96964	106.249	2.24454	4.31227	27.6594	1.45e-07	0.000128
Tmem72	0.0150771	0	1.38967	0.0947842	1.58033	14.3912	4.65902	1.35769	27.188	1.85e-07	0.000154
Ak7	0.0753856	0.0574991	0.463222	0.511835	0.288878	3.91499	2.73528	-0.361276	26.0578	3.31e-07	0.000262
Slc39a4	0.0603085	0.0766655	0.509544	0.227482	0.458807	5.00249	2.71361	-0.130809	25.113	5.41e-07	0.000406
Sycp1	1.13078	0.153331	0	0	0	0	-7.5131	-1.67507	24.9839	5.78e-07	0.000413
Ier3	9.12166	7.62822	10.0982	17.7247	18.8281	20.01	1.06479	3.79766	24.4513	7.62e-07	0.00052
Tpm3-rs7	45.7742	64.0157	64.0636	3.69659	3.89136	53.7224	-2.78582	5.26454	23.997	9.65e-07	0.00063
Gm14165	0.467391	0.364161	0.138967	2.21795	5.09785	0.145	2.71717	0.666984	23.5783	1.2e-06	0.00075
Rbm47	0.31662	0.114998	1.80657	0.587662	0.951599	10.5125	2.06173	1.07708	23.0354	1.59e-06	0.000955
Gm13736	6.22685	5.36659	0.694833	1.38385	1.46138	0.434999	-1.74237	1.48708	22.583	2.01e-06	0.00116
1700023H06Rik	1.20617	0.574991	0.231611	0.0568705	0.152936	0	-3.20124	-1.10341	22.2768	2.36e-06	0.00131
Hba-a1	18.5901	11.404	12.1364	28.8334	30.4172	26.0637	1.00653	4.41849	21.6971	3.19e-06	0.00171
Fam180a	9.83029	6.47824	12.1364	16.701	13.1525	33.4224	1.05178	3.90183	18.9937	1.31e-05	0.00679
Ccl2	0.301543	0.804988	0.926444	7.63961	0.866635	5.72749	2.83086	1.45071	18.5058	1.69e-05	0.00821
Dnahc11	0	0.0191664	0.0463222	0.113741	0.0679714	1.45	3.95606	-1.97469	18.5419	1.66e-05	0.00821
Acox2	0	0	0.0926444	0.0189568	0.101957	1.92125	4.31205	-1.72722	18.3223	1.87e-05	0.00875
Cgnl1	16.5396	5.44325	15.4716	37.9516	16.619	83.5199	1.6757	4.82028	18.0803	2.12e-05	0.00964
Postn	2.80435	1.43748	3.70578	3.63971	7.23895	13.2312	1.49346	2.37535	17.8648	2.37e-05	0.0105
Cdkn1c	26.0834	22.0988	42.1069	37.3829	34.3935	94.8661	0.756744	5.38088	17.7498	2.52e-05	0.0106
Hspb1	17.1879	18.7447	22.4199	53.4962	22.5155	56.4774	1.1527	4.98081	17.6759	2.62e-05	0.0106
Slc4a5	0.0452314	0.0958319	2.82565	0.0379137	0.968592	23.7075	2.88757	2.01885	17.7222	2.56e-05	0.0106
Selenbp2	1.10063	0.939153	1.38967	0.0758274	0.0679714	0.797499	-2.65704	-0.462329	17.5703	2.77e-05	0.0109
Agxt2l1	76.4561	48.1651	52.1588	28.0182	31.5047	39.7662	-0.859097	5.52458	17.2576	3.26e-05	0.0126
Lbp	5.54838	2.87496	8.15271	6.95716	9.05719	32.6612	1.26422	3.37477	17.0076	3.72e-05	0.014
Ighg1	0	0	0	0	1.39341	0.0362499	7.7445	-1.61178	16.6721	4.44e-05	0.0163
Pcna-ps2	11.8959	24.7055	1.62128	3.22266	2.82081	1.55875	-1.881	3.00103	16.573	4.68e-05	0.0167
Pcp4l1	26.2493	14.7773	13.6187	50.3683	25.2174	55.0637	1.24318	4.94174	16.2384	5.59e-05	0.0195
Zfhx3	2.71388	2.81746	7.04097	5.91454	5.14883	16.2762	1.05247	2.68006	16.1288	5.92e-05	0.0202
Lhb	0.0150771	0	0.602189	0.0568705	0.2379	3.33499	2.8621	-0.765788	15.9987	6.34e-05	0.0207
Tmem212	0.0301543	0.344995	0.185289	1.99047	0.424821	2.8275	3.04953	-0.0592784	16.0226	6.26e-05	0.0207
Tagln	18.379	17.4606	11.1173	76.9458	15.9903	54.6649	1.67159	5.02472	15.7998	7.04e-05	0.0225
Rnase1	5.48807	4.86826	3.89106	2.23691	1.92019	2.06625	-1.20562	1.8055	15.7497	7.23e-05	0.0226
Myh11	8.86535	6.05658	7.55052	37.2881	6.06644	56.5499	1.98183	4.31179	15.674	7.53e-05	0.0231
Aqp1	0.241234	0.172497	2.54772	0.189568	1.07055	19.6475	2.08429	1.81002	15.5379	8.09e-05	0.0234
Slc16a8	0.0150771	0.134165	1.15805	0.0947842	1.27446	7.97499	2.99885	0.643115	15.6059	7.8e-05	0.0234
Sult1c2	0	0	0.185289	0	0.322864	2.35625	4.32428	-1.28085	15.5396	8.08e-05	0.0234
1700019G17Rik	32.7174	21.8497	41.6437	16.1323	16.2112	23.635	-0.790216	4.65433	15.4426	8.51e-05	0.0241
Cacna2d4	0.934782	0.843321	2.96462	0.379137	0.305871	0.543749	-1.73813	-0.09119	15.337	8.99e-05	0.0243
Capn6	0.180926	0.134165	0.4169	0.66349	0.679714	1.2325	1.88356	-0.827872	15.3335	9.01e-05	0.0243
Hebp1	18.6052	29.2096	32.3329	8.13249	12.0139	24.2512	-0.994073	4.35899	15.2893	9.22e-05	0.0243
Rbpms	8.86535	6.15241	6.85569	17.7436	9.75389	23.925	1.1631	3.59693	15.2876	9.23e-05	0.0243
Dnahc6	0.21108	0.0574991	0.370578	0.398094	0.458807	3.44374	2.15602	-0.428265	15.21	9.62e-05	0.0249
Sgms2	1.02524	0.785822	2.36243	2.33169	1.49537	10.7662	1.43484	1.54517	15.0035	0.000107	0.0273
Cdc42ep3	4.46283	3.39245	2.31611	8.68224	6.03246	9.24373	1.22883	2.52137	14.9713	0.000109	0.0273
Gm8730	1.34186	1.64831	1.34334	11.3552	23.5691	1.2325	2.50172	2.83508	14.7406	0.000123	0.0299
Tctex1d4	0.0603085	0.0574991	0.277933	0.66349	0.11895	1.92125	2.69392	-1.05335	14.7546	0.000122	0.0299
Defb11	0	0	0.555866	0.151655	0.288878	1.8125	3.08577	-1.29875	14.6504	0.000129	0.0308
Cwc22	43.0301	32.4487	23.6243	15.393	20.0346	20.0462	-0.830684	4.69743	14.5395	0.000137	0.0322
Tmem184a	0.0150771	0	0.370578	0.0379137	0.152936	2.61	2.86487	-1.18197	14.4571	0.000143	0.0331
Acta2	45.2314	52.8225	19.0847	266.192	32.0145	122.815	1.95537	6.50897	14.1257	0.000171	0.0389
Hist2h2bb	0.738779	1.60998	2.17714	0.132698	0.0509785	1.41375	-2.5455	-0.0481662	13.9915	0.000184	0.0412
Col8a2	1.11571	0.42166	7.68948	1.0995	2.07313	36.4312	1.44531	2.87593	13.9486	0.000188	0.0415
Gm12282	0.271388	0.249163	0.185289	0.777231	2.17508	0.362499	2.15102	-0.367515	13.8199	0.000201	0.0435
Prkch	4.10098	3.10495	3.93739	7.73439	7.12	7.93874	1.01887	2.51134	13.8047	0.000203	0.0435
F5	0.21108	0.287496	3.42784	0.341223	1.49537	11.31	1.78835	1.3391	13.7705	0.000207	0.0437
Car14	10.9912	7.51322	8.19903	12.9665	15.6334	29.0362	0.997775	3.78979	13.6423	0.000221	0.0461
Igfbp7	38.0999	21.5813	30.1094	96.9832	30.944	94.1773	1.27501	5.69037	13.6196	0.000224	0.0461
Sncg	1.65848	1.49498	1.34334	5.28896	2.12411	5.69124	1.48616	1.56184	13.5592	0.000231	0.0469
Hba-a2	10.3278	6.09491	6.48511	16.8526	15.3955	11.9987	0.933456	3.50578	13.5022	0.000238	0.0477
Dpep1	0.0753856	0	0.926444	0.322266	0.492792	2.2475	2.32293	-0.73441	13.4082	0.000251	0.0495
Kcne4	1.94495	2.58746	4.03003	4.17051	4.29919	10.9112	1.05996	2.1781	13.0124	0.000309	0.0604
Elovl7	3.82959	1.03498	4.07635	4.51173	5.59065	34.1112	1.68851	3.04915	12.9537	0.000319	0.0615
Eea1	59.3134	81.1888	61.1916	223.027	287.808	59.1236	1.23099	7.0442	12.8937	0.00033	0.0627
Aoc3	0.301543	0.268329	0.926444	2.12317	0.390835	3.58874	2.05832	0.28164	12.8686	0.000334	0.0627
Col8a1	3.07573	1.64831	7.78213	3.63971	4.0443	46.6899	1.3087	3.35846	12.7244	0.000361	0.0668
Ctgf	27.9228	33.8478	41.412	33.5726	54.2581	149.712	0.927609	5.77635	12.7045	0.000365	0.0668
4930481A15Rik	5.29207	4.6191	2.54772	1.83881	2.66788	1.19625	-1.13458	1.66191	12.5977	0.000386	0.069
Krt8	0	0.114998	0.880122	0.0189568	0.866635	10.1137	3.14206	0.791921	12.6079	0.000384	0.069
Ptpn14	2.59327	1.78247	2.45508	4.96669	3.16067	10.15	1.24801	2.03421	12.5766	0.000391	0.069
Gm14292	0.31662	0.459993	0.0463222	1.51655	1.07055	0.2175	1.79517	-0.479458	12.4778	0.000412	0.0711
Pf4	0.42216	0.383328	0.138967	1.2322	0.798664	1.2325	1.72252	-0.399904	12.456	0.000417	0.0711
Trpv4	1.23632	0.325828	3.61313	1.59238	1.83523	18.3425	1.52531	2.03187	12.4647	0.000415	0.0711
Gt(ROSA)26Sor	27.169	23.498	11.2563	52.3967	30.2473	22.8737	0.796356	4.83344	12.3982	0.00043	0.0725
Armc4	0	0.0383328	0.0926444	0.151655	0.0509785	1.34125	3.01419	-1.97841	12.3518	0.000441	0.0735
Cnn2	21.7714	15.2948	22.7905	27.9614	24.3677	55.7887	0.744059	4.78	12.05	0.000518	0.0851
Prlr	4.86991	1.85914	6.90201	3.96198	8.85327	49.3724	1.53086	3.55718	12.0382	0.000521	0.0851
Myct1	0.21108	0.0766655	0.138967	1.08054	0.220907	1.19625	2.39665	-0.964833	11.8605	0.000573	0.0926
Gm7125	5.95547	6.20991	0.926444	9.63008	13.8832	1.92125	0.966694	2.75973	11.6951	0.000627	0.0991
Klf9	112.882	115.631	124.838	188.374	199.241	154.243	0.593306	7.22838	11.7122	0.000621	0.0991
Des	7.4481	4.58076	6.57775	16.7958	6.30434	23.925	1.23462	3.42825	11.6646	0.000637	0.0997
Wdr63	0.0904628	0.0191664	0.185289	0.227482	0.11895	2.3925	2.35489	-1.17325	11.5642	0.000672	0.103
Zic1	10.7651	15.6206	15.1474	25.5349	22.6345	22.8012	0.760475	4.23586	11.556	0.000675	0.103
Lfng	93.629	80.288	180.749	51.0508	65.9832	129.594	-0.559703	6.62137	11.5034	0.000695	0.104
Pln	2.87973	1.03498	1.01909	9.21303	1.85222	7.14124	1.90482	1.9681	11.5112	0.000692	0.104
1700003M02Rik	0.0603085	0.249163	0.694833	0.568705	0.288878	4.16874	1.88209	-0.169976	11.4545	0.000713	0.106
Gjc1	10.8103	8.98903	8.24535	16.3218	14.7498	16.4212	0.745087	3.66224	11.4171	0.000728	0.107
Abcc9	1.10063	0.517492	1.85289	1.70612	1.97117	5.25624	1.26595	0.994297	11.3685	0.000747	0.109
Anxa1	7.14656	3.56495	4.49325	9.51634	8.03761	18.56	1.12746	3.07413	11.3011	0.000775	0.112
Enpp2	159.591	83.1438	383.085	118.746	271.784	1594.63	1.11783	8.6721	11.2604	0.000792	0.113
Palmd	13.1171	9.77485	8.29167	17.1749	21.5639	14.1012	0.74532	3.82726	11.242	0.0008	0.113
Ccl7	0.346774	1.32248	1.71392	5.72497	1.39341	5.11124	1.91065	1.37949	11.2176	0.00081	0.114
Gja4	5.84993	4.23577	5.32705	15.1276	5.31876	16.385	1.20717	3.11415	11.1761	0.000829	0.115
Aldh1l1	136.855	59.7416	144.155	58.8231	46.1865	90.1536	-0.839521	6.46698	11.1544	0.000838	0.116
Mrgprf	0.165848	0.0383328	1.20438	1.19428	0.2379	3.22624	2.23157	-0.122868	11.1313	0.000849	0.116
Tinagl1	13.7805	5.84575	9.54237	30.3499	10.0768	34.8724	1.30975	4.10702	11.0737	0.000876	0.118
B3gnt3	0.678471	0.306662	0.370578	1.21324	1.20649	1.5225	1.47515	-0.101033	10.8342	0.000996	0.132
Rtp1	2.17111	1.09248	1.52863	0.701403	0.424821	0.652499	-1.45079	0.197848	10.8404	0.000993	0.132
Ptgir	0.135694	0.0383328	0.185289	0.322266	0.186921	1.99375	2.11895	-1.18737	10.7849	0.00102	0.135
Gm17200	1.20617	0.555825	3.01094	4.32216	1.17251	8.22874	1.56354	1.56047	10.7265	0.00106	0.137
Tmem130	25.3447	19.7797	20.1038	12.322	10.2807	17.7625	-0.744404	4.13685	10.741	0.00105	0.137
Mylk	9.18197	4.40827	8.70857	19.6583	6.69518	33.9299	1.28034	3.74609	10.6884	0.00108	0.138
2810474O19Rik	35.1749	36.0328	45.1641	51.9228	56.3483	62.0236	0.538388	5.57412	10.5141	0.00118	0.151
F630111L10Rik	0.31662	0.191664	0.648511	0.985756	0.577757	1.70375	1.51456	-0.450442	10.4856	0.0012	0.152
Acp6	44.2514	47.3026	53.7337	28.8334	28.1911	45.9649	-0.549571	5.363	10.4157	0.00125	0.154
Rbp4	22.0126	15.5248	16.7686	32.5868	20.0176	56.7312	0.890441	4.74505	10.4252	0.00124	0.154
Rps15a-ps8	0	0.0574991	0.138967	1.99047	1.1895	0.0362499	3.90968	-0.555217	10.435	0.00124	0.154
Ebf1	5.98562	3.77578	4.81751	8.39788	6.8821	15.4425	0.965064	2.89682	10.3246	0.00131	0.16
Bcan	482.453	343.481	731.844	289.357	294.996	470.234	-0.561018	8.75092	10.3077	0.00132	0.16
Pi4kb	19.4495	17.7864	39.0033	8.98555	11.7081	33.6762	-0.654103	4.40663	10.1487	0.00144	0.173
Kcnj16	53.4484	20.5655	59.3851	20.8146	18.1823	35.1262	-0.879848	5.09521	10.1119	0.00147	0.176
mmu-mir-689-2	73.8478	49.4493	0	96.8505	88.1419	0.434999	0.747233	5.74677	10.0734	0.0015	0.178
Gimap1	1.26648	0.881653	0.555866	3.26058	1.37642	2.5375	1.40679	0.779379	9.9423	0.00162	0.188
Rbms1	23.3846	18.4572	20.3818	27.9803	27.7663	43.2824	0.617649	4.73672	9.94388	0.00161	0.188
St6galnac2	2.81942	1.22665	2.9183	4.64443	2.8548	11.1287	1.2158	2.04692	9.89551	0.00166	0.191
Gm17685	0.196003	0.574991	0.231611	3.22266	1.98816	0.145	2.05755	0.272729	9.87648	0.00167	0.192
1700027A23Rik	0.196003	0.114998	0.324255	0.208525	0.543771	2.755	1.84374	-0.659585	9.84116	0.00171	0.194
Tm4sf1	26.8524	12.4965	14.2672	44.6434	21.1051	42.6299	1.0087	4.7534	9.81947	0.00173	0.195
Spr-ps1	0.693548	0.919986	0.324255	2.46439	1.95418	0.543749	1.30649	0.357448	9.75511	0.00179	0.2
Tmem87a	12.71	17.7672	4.12268	4.92878	4.57107	4.78499	-1.11125	3.06814	9.74703	0.0018	0.2
BC026585	66.7917	61.0258	55.1697	48.1125	40.0861	40.2374	-0.524083	5.70708	9.69052	0.00185	0.205
BC002163	12.0768	18.3997	1.01909	35.1839	14.4779	5.50999	1.18507	3.91817	9.66329	0.00188	0.206
Ighg2c	0.768933	0.0191664	5.79027	0.0379137	0.0169928	2.32	-2.69036	0.317736	9.59772	0.00195	0.21
Il33	38.2657	13.2823	47.6192	14.938	10.0428	27.0787	-0.976844	4.63239	9.60356	0.00194	0.21
Pdzk1ip1	0.753856	0.383328	0.741155	1.70612	1.01957	2.2475	1.34492	0.213602	9.5874	0.00196	0.21
Atp10d	0.633239	0.709156	1.06541	2.27482	1.05356	2.64625	1.29713	0.491085	9.51478	0.00204	0.213
Ddx3y	64.9221	24.073	0.0463222	9.08033	22.1757	0.0724999	-1.36272	4.37971	9.54446	0.00201	0.213
Epn3	0.301543	0.249163	1.89921	0.265396	0.747685	11.4912	1.50035	1.12913	9.50691	0.00205	0.213
Foxf2	3.43758	1.34165	4.12268	5.78184	3.67045	11.6	1.13826	2.28202	9.52702	0.00202	0.213
Clrn1	0.980013	1.09248	0.555866	0.0758274	0.220907	0.543749	-1.9236	-0.662361	9.39183	0.00218	0.218
Gm11223	172.708	280.73	47.156	297.983	500.32	70.3611	0.712944	7.87728	9.39708	0.00217	0.218
Gm6724	17.9267	20.508	5.65131	26.8998	43.3827	7.57624	0.717983	4.39334	9.42543	0.00214	0.218
Klf4	2.26157	2.60663	3.10359	5.38374	2.92277	9.96873	1.0523	2.10006	9.39397	0.00218	0.218
Lpo	1.65848	1.03498	1.34334	0.36018	0.577757	0.761249	-1.31589	-0.00704548	9.41728	0.00215	0.218
Maf	9.19705	8.58654	13.2481	17.99	9.9748	28.3837	0.787207	3.8397	9.39214	0.00218	0.218
Mgp	46.5582	40.4219	44.1451	106.386	42.4651	87.5798	0.836075	5.93715	9.31333	0.00227	0.226
Traf1	6.01577	5.73075	5.8366	4.01885	2.24306	2.79125	-0.968118	2.17268	9.29561	0.0023	0.227
Gpr20	0.42216	0.440827	0.324255	1.91464	0.441814	1.8125	1.73671	-0.110953	9.27456	0.00232	0.228
Serpinb1b	0.271388	0.153331	0.324255	0.170612	0.883628	4.20499	2.03138	-0.132521	9.24097	0.00237	0.231
Cytl1	0.919705	0.383328	0.4169	5.95245	0.254893	2.5375	2.35806	0.874982	9.1857	0.00244	0.236
Gm17383	1.73387	18.8022	0.602189	2.12317	1.83523	0.326249	-1.99105	2.18069	9.15525	0.00248	0.239
Syne2	21.9523	30.6087	44.1451	35.1839	35.9908	82.4686	0.571904	5.35119	9.14274	0.0025	0.239
Tbx18	6.10624	3.46911	7.73581	7.67752	7.91866	16.965	0.828643	3.02405	9.12282	0.00252	0.24
Iqca	0.120617	0.191664	0	0.644533	0.203914	1.2325	2.34061	-1.26251	9.10521	0.00255	0.241
Fgfbp1	9.2272	5.46242	5.32705	12.8907	10.9774	11.165	0.803974	3.21456	9.07146	0.0026	0.244
Cnn1	2.26157	3.64161	0.787477	15.374	1.24048	6.99624	1.99947	2.38217	9.02619	0.00266	0.245
Gata6	0.241234	0.0574991	0.741155	0.341223	0.373843	3.47999	1.5734	-0.374303	9.03776	0.00264	0.245
Pygl	36.1851	27.6188	29.9241	19.4687	20.4084	24.65	-0.563681	4.72264	9.02652	0.00266	0.245
Itga10	0.633239	0.479159	0.509544	1.44072	1.03656	1.45	1.23766	-0.0395226	9.01051	0.00268	0.246
Podxl	13.5543	5.92241	13.1092	30.8807	11.0793	27.8762	1.0954	4.08773	8.96694	0.00275	0.25
Cox8b	0.467391	0.249163	0.324255	1.04263	0.628735	1.41375	1.45154	-0.477473	8.93086	0.0028	0.254
Ptgds	10228.9	6532.59	9176.38	14864.2	10821.1	14347.6	0.613329	13.4218	8.86441	0.00291	0.261
Filip1l	6.40778	5.25159	3.42784	13.7437	5.18282	15.4062	1.15782	3.04065	8.84535	0.00294	0.263
Gm14403	5.3373	5.53908	7.31891	2.21795	2.48096	6.37999	-0.894344	2.26498	8.81097	0.00299	0.266
Lmod1	2.18618	1.57164	3.01094	7.71544	1.9032	7.46749	1.33279	1.98485	8.79214	0.00303	0.267
Cml5	4.8096	2.2233	3.61313	1.34594	0.849642	2.86375	-1.25117	1.38951	8.7527	0.00309	0.271
Creg2	53.3278	20.7955	18.5752	14.938	12.4218	18.0525	-0.993008	4.53494	8.7488	0.0031	0.271
Eif5al3-ps	0.889551	1.41831	0.741155	5.47853	2.8378	0.833749	1.3899	1.13963	8.72667	0.00314	0.272
Osr1	17.0673	8.18404	15.101	28.0182	16.0412	29.7249	0.8511	4.24284	8.70597	0.00317	0.274
Foxl2	0.814165	0.21083	1.43599	1.64925	1.32544	3.15374	1.37671	0.48461	8.68874	0.0032	0.275
Gm9625	4.17636	4.00577	3.79842	13.2888	27.7323	2.86375	1.48739	3.27838	8.61847	0.00333	0.284
Klhl31	0.10554	0.172497	0.324255	0.341223	0.271885	1.77625	1.57986	-1.09533	8.56314	0.00343	0.291
Tmem204	17.0824	6.59323	8.80122	22.5018	16.2452	22.9462	0.920042	3.97486	8.53581	0.00348	0.294
Gm13861	0.949859	0.747489	0.463222	3.16579	0.968592	1.63125	1.42607	0.492685	8.51387	0.00352	0.296
Fam176a	58.4993	59.9141	57.3469	39.4682	40.9358	48.5024	-0.471891	5.66727	8.48229	0.00359	0.299
Clec14a	3.57328	1.30331	2.36243	6.76759	2.53193	11.5275	1.36007	2.19712	8.46112	0.00363	0.301
A730020E08Rik	6.98071	8.81653	4.67854	11.1656	17.1288	7.32249	0.76226	3.26104	8.43627	0.00368	0.302
Hbb-b1	51.5789	16.8089	24.2728	69.0408	53.3575	49.6624	0.894761	5.47433	8.44326	0.00366	0.302
Eif2s3y	65.2086	26.3538	0	7.52587	25.6592	0	-1.43452	4.43071	8.35669	0.00384	0.314
2210020M01Rik	0.361851	0.747489	0.694833	1.36489	0.815656	3.15374	1.34151	0.219662	8.23824	0.0041	0.314
Ahnak	37.7531	15.4481	38.7717	51.7712	27.5454	132.711	0.964339	5.61356	8.25939	0.00405	0.314
Arrdc2	24.8019	28.5771	28.3492	15.6015	22.5835	16.4212	-0.602227	4.51425	8.13838	0.00433	0.314
BC064078	1.99018	4.00577	2.45508	1.47863	0.560764	1.48625	-1.30406	1.03268	8.12596	0.00436	0.314
Foxc1	23.8068	10.4648	34.7416	24.6439	27.1546	70.6511	0.724137	4.95237	8.122	0.00437	0.314
Gm12250	0.21108	0.21083	0.4169	1.19428	0.390835	0.869998	1.62924	-0.778247	8.12551	0.00436	0.314
Gm14207	0.693548	1.09248	0.694833	1.97151	2.02215	1.3775	1.10425	0.476425	8.1301	0.00435	0.314
Gm9855	3.42251	1.32248	0.0926444	0.739317	0.0849642	0.0724999	-2.15212	0.159193	8.29926	0.00397	0.314
Hagh	100.7	110.533	73.467	170.763	143.386	94.7936	0.488823	6.87303	8.30344	0.00396	0.314
Hmgn2-ps1	32.25	32.9087	9.49605	52.719	72.1516	9.82373	0.647669	5.17319	8.20438	0.00418	0.314
Igfbp6	30.4558	22.7888	32.2866	38.4634	30.893	63.5099	0.563255	5.16637	8.1889	0.00421	0.314
Il17re	0.346774	0.364161	0.4169	0.758274	0.543771	2.57375	1.39283	-0.309337	8.27712	0.00401	0.314
Kank4	0.376928	0.153331	0.463222	1.00471	0.594749	1.0875	1.45178	-0.63804	8.21326	0.00416	0.314
Kcnj8	2.97019	1.57164	3.65945	4.54964	3.27962	9.53373	0.965402	2.05613	8.27585	0.00402	0.314
Mapk15	0.180926	0.479159	0.138967	0.568705	0.713699	2.79125	1.83329	-0.344976	8.1222	0.00437	0.314
Mecom	1.13078	0.249163	0.694833	2.23691	1.12153	2.97249	1.5198	0.503118	8.16012	0.00428	0.314
Pcolce2	1.46248	2.24247	3.28888	2.38856	3.46654	11.165	1.00357	1.93621	8.28681	0.00399	0.314
Ppp1r14a	3.90498	4.94493	3.10359	11.3552	6.27036	5.18374	0.904214	2.57826	8.1765	0.00424	0.314
Ptrf	31.6318	19.5497	56.6984	42.8046	26.4748	137.025	0.70345	5.65389	8.15535	0.00429	0.314
Rasgrp3	5.18653	1.89747	3.3352	9.61112	4.9789	8.01124	1.1055	2.4751	8.14364	0.00432	0.314
Sfxn5	95.393	83.1246	258.339	71.4104	60.0867	185.563	-0.468774	6.9378	8.17327	0.00425	0.314
Slc25a34	2.26157	0.862487	4.30796	0.890972	0.305871	1.63125	-1.40094	0.707306	8.32957	0.0039	0.314
Sox17	5.65392	2.0508	3.19623	12.0755	4.14625	10.1137	1.25923	2.64363	8.31946	0.00392	0.314
Thbs4	61.1378	59.1091	67.7694	38.6909	51.9811	42.9199	-0.509164	5.74746	8.14636	0.00431	0.314
Timp4	100.655	100.298	90.3746	80.0548	69.7556	63.7274	-0.466236	6.40449	8.24846	0.00408	0.314
Tmem132b	84.8993	47.7818	103.345	16.9664	45.9826	76.5961	-0.882959	5.94355	8.09468	0.00444	0.317
Grb7	0.271388	0	0	0.644533	0.339857	1.0875	2.68255	-1.2457	8.07682	0.00448	0.319
Hist3h2ba	10.9912	20.6039	24.3192	51.2214	44.9291	21.5687	1.01697	4.8802	8.03198	0.0046	0.324
Prex2	173.553	172.382	204.559	111.713	138.05	160.551	-0.449141	7.3186	8.03992	0.00458	0.324
Sox18	7.93057	2.62579	5.09544	14.3503	8.17356	10.3312	1.06167	3.03168	7.98623	0.00471	0.331
Msrb3	2.92496	1.51414	2.64037	6.21785	2.27704	8.66373	1.17924	1.99665	7.96549	0.00477	0.333
Flt1	33.5768	9.64069	14.4988	55.771	23.9429	43.7174	1.11317	4.92071	7.95628	0.00479	0.333
Bmp2	3.15112	2.47246	6.2535	4.36008	4.45212	13.195	0.772755	2.44531	7.94071	0.00483	0.335
Ccdc135	1.71879	0.824154	3.19623	1.19428	2.78683	24.65	1.3746	2.38728	7.89341	0.00496	0.335
Ecel1	1.28156	0.613324	1.20438	0.398094	0.152936	0.688749	-1.474	-0.427977	7.90295	0.00494	0.335
Epyc	0.0452314	0.0574991	1.15805	0.0189568	0.526778	3.98749	2.07726	-0.287752	7.88882	0.00497	0.335
Gm4353	3.61851	3.39245	0.4169	1.15637	0.934606	0.579999	-1.22938	0.884725	7.90338	0.00493	0.335
Klf6	45.5782	43.8143	43.9134	65.6476	54.0882	67.7511	0.473246	5.74058	7.91233	0.00491	0.335
Wdr86	1.08555	0.383328	2.45508	1.0995	1.41041	11.02	1.22446	1.41009	7.89092	0.00497	0.335
Rps15a-ps7	0.618162	0.479159	0.185289	1.76299	1.58033	0.145	1.32981	-0.113364	7.87281	0.00502	0.336
Tmprss11a	0	0	0.370578	0.0189568	0.135943	1.26875	2.57775	-1.95925	7.82524	0.00515	0.344
Cyp2j9	122.743	69.3631	78.2845	64.4533	63.7232	56.0787	-0.563521	6.2515	7.79409	0.00524	0.348
Gm16628	13.4036	7.32156	11.5805	5.68705	5.91351	7.75749	-0.766658	3.10641	7.78789	0.00526	0.348
9430020K01Rik	79.0192	27.8871	49.0089	109.741	61.0553	129.739	0.910781	6.23691	7.76543	0.00533	0.351
Nkx6-1	1.16094	0.766655	1.2507	2.65396	1.34243	3.08124	1.11532	0.785942	7.73895	0.0054	0.353
Srgn	20.0375	9.31486	13.1092	30.5016	18.8111	24.5412	0.790377	4.28429	7.74311	0.00539	0.353
Igfn1	0.0301543	0.0191664	0.509544	0	0.288878	2.42875	2.29582	-1.11587	7.68949	0.00555	0.361
Cdr2	2.38219	1.53331	2.22347	2.71083	3.3306	7.46749	0.964929	1.6837	7.67648	0.00559	0.362
Cd109	4.70406	3.39245	5.0028	2.46439	2.39599	2.32	-0.86573	1.77186	7.6656	0.00563	0.363
Gm11681	12.8156	15.1798	10.3762	8.32206	9.0232	7.57624	-0.632288	3.41892	7.6526	0.00567	0.363
Kcnq1	0.180926	0.0574991	0.0463222	0.587662	0.11895	1.0875	2.22504	-1.46287	7.64805	0.00568	0.363
Atp2a3	3.27174	0.958319	3.24255	5.76288	2.22606	14.8262	1.32718	2.27536	7.63522	0.00572	0.364
BC021891	0.196003	0	0.231611	0.208525	0.441814	1.5225	1.98175	-1.25107	7.6249	0.00576	0.365
Eps8l2	1.47756	0.613324	1.52863	1.83881	1.56334	7.90249	1.22249	1.23838	7.6136	0.00579	0.366
Nos3	6.34747	3.06662	4.5859	11.2983	5.01289	12.9775	1.01456	2.84521	7.59406	0.00586	0.368
Adm	4.52314	6.65073	4.67854	7.75335	7.28993	17.7987	0.890617	2.9962	7.56517	0.00595	0.371
Sh2d5	37.346	29.0179	28.6734	15.2603	21.5809	28.0212	-0.599804	4.73323	7.5711	0.00593	0.371
Foxd1	9.84536	5.48158	18.4362	12.6821	9.39704	40.3462	0.714329	3.94553	7.5423	0.00603	0.374
Gm12892	23.7616	87.1304	18.8531	21.8762	16.721	17.0375	-1.09655	4.98118	7.52982	0.00607	0.375
Wnt7b	133.417	120.729	215.861	90.6327	87.4622	187.086	-0.427728	7.09958	7.51583	0.00612	0.376
Tbx2	1.89972	1.64831	4.5859	3.84824	2.31103	9.67873	0.874155	1.93892	7.48154	0.00623	0.382
Slc9a3r2	41.5073	31.5287	34.6953	61.8941	38.2679	64.1624	0.585866	5.49958	7.47332	0.00626	0.382
Heg1	19.4947	21.6388	31.3601	26.0467	33.0001	44.6237	0.497936	4.86041	7.46079	0.00631	0.383
Myh14	56.3583	43.4693	75.1809	39.8852	32.7962	52.7437	-0.489976	5.63595	7.45575	0.00632	0.383
Cldn5	27.0484	8.29904	11.21	48.5106	17.2817	33.6037	1.11968	4.614	7.4268	0.00643	0.388
Ogn	33.4109	11.3465	22.6516	46.9561	27.1376	54.4474	0.898174	5.01858	7.40683	0.0065	0.39
Plbd1	3.19635	2.87496	2.96462	0.36018	0.152936	5.72749	-2.2035	1.29124	7.40213	0.00651	0.39
Agt	339.673	354.214	311.98	245.131	276.66	237.002	-0.425191	8.207	7.39442	0.00654	0.39
Pygb	754.022	438.163	937.793	419.705	406.367	656.994	-0.537827	9.21997	7.38396	0.00658	0.391
Ephx2	70.5459	41.9552	54.3359	40.5487	36.7725	37.8087	-0.54838	5.55899	7.37582	0.00661	0.391
Ubc	136.418	140.336	157.82	105.192	71.9477	139.055	-0.505392	6.96069	7.3335	0.00677	0.399
Kl	5.18653	1.78247	15.0547	3.01414	7.76573	80.2574	1.19767	4.11362	7.30137	0.00689	0.404
Slc7a11	65.6458	32.7553	63.1835	52.8517	85.2361	138.584	0.685486	6.16218	7.29675	0.00691	0.404
Hspg2	3.31697	1.39915	7.41155	6.95716	3.72143	11.9262	1.0024	2.48989	7.21639	0.00722	0.421
Atp13a4	10.4937	3.94827	10.8857	3.7345	3.53451	6.59749	-0.913999	2.69222	7.18248	0.00736	0.425
Foxq1	3.30189	1.05415	1.57495	5.23209	3.04172	5.07499	1.15494	1.7082	7.18163	0.00737	0.425
Neurod4	29.913	49.5834	44.562	49.1551	80.1892	64.7061	0.623699	5.72867	7.15318	0.00748	0.426
Prg4	2.97019	2.2808	3.98371	7.6017	2.66788	8.88123	1.01955	2.22868	7.16416	0.00744	0.426
Tcf21	0.0150771	0.0383328	0.648511	0.208525	0.0339857	2.2475	1.89237	-1.1766	7.15886	0.00746	0.426
Tpm2	33.9085	38.7736	20.4744	103.144	25.1664	53.0699	0.994574	5.53602	7.15684	0.00747	0.426
AI467606	1.41725	0.134165	0.555866	3.29849	1.17251	2.6825	1.7489	0.676962	7.12539	0.0076	0.431
F13a1	0.768933	0.383328	0.787477	1.19428	0.730692	4.67624	1.3034	0.430632	7.10495	0.00769	0.434
Abhd3	152.822	85.8079	152.029	82.3296	82.1094	108.242	-0.535434	6.78163	7.0931	0.00774	0.435
Hbb-y	0.271388	0.0191664	0	0.890972	0.11895	1.16	2.69683	-1.19276	7.07021	0.00784	0.439
Tbx15	1.07048	0.90082	1.94553	1.63029	1.56334	5.25624	0.920408	0.985168	7.0559	0.0079	0.441
Ass1	36.2756	30.992	63.5077	25.9898	23.9939	46.3999	-0.452635	5.22251	7.04191	0.00796	0.441
Cryz	74.7222	68.0023	71.7068	51.8659	54.1392	56.2962	-0.419657	5.97512	7.04434	0.00795	0.441
Gpd1	916.056	907.662	1257.97	683.508	639.95	1041.24	-0.416472	9.81531	7.03177	0.00801	0.442
Rgs13	0.708625	0.919986	0.509544	1.27011	1.88621	1.34125	1.05994	0.239549	7.01828	0.00807	0.444
Cyb561	13.102	9.50652	13.7114	15.0328	12.3368	46.5812	0.747077	4.15285	6.97184	0.00828	0.445
Fn3krp	2.12587	2.0508	5.32705	5.28896	17.7405	4.05999	1.56613	2.64274	6.9743	0.00827	0.445
Gpnmb	14.8057	8.9507	12.0438	5.38374	5.40372	12.18	-0.775303	3.28039	7.00554	0.00813	0.445
Kcnk13	8.18688	9.31486	10.2835	5.38374	5.13184	7.61249	-0.653946	2.93492	6.96601	0.00831	0.445
P2rx1	0.346774	0.325828	0.324255	1.85777	0.254893	1.19625	1.70881	-0.390609	6.9801	0.00824	0.445
Pcx	302.598	183.211	389.94	181.758	157.524	282.097	-0.514224	7.94797	6.99011	0.0082	0.445
Thsd1	2.87973	0.498326	1.11173	4.11364	2.65088	5.61874	1.41119	1.50116	6.96255	0.00832	0.445
Tnfsf10	0.768933	0.114998	0.231611	1.57342	0.509785	2.5375	1.85621	-0.0496652	6.99958	0.00815	0.445
Ltbp4	30.3653	14.1831	32.4255	44.9467	20.9862	85.4411	0.833941	5.2138	6.94826	0.00839	0.446
Utrn	36.4113	20.4122	31.1748	51.5247	27.6813	72.9711	0.717022	5.30413	6.94366	0.00841	0.446
Capn11	0.286465	1.07332	0.509544	0.985756	2.17508	1.92125	1.40457	0.270921	6.93019	0.00848	0.448
Bhlhe22	24.3496	31.0879	49.9817	35.2977	62.5507	60.5374	0.616878	5.44601	6.90446	0.0086	0.452
Cldn1	1.88464	0.364161	2.17714	0.815144	3.85738	17.7625	1.67084	2.04901	6.90425	0.0086	0.452
Syt15	0.226157	0.0383328	0.648511	0.36018	0.407828	1.74	1.43119	-0.911814	6.8884	0.00868	0.454
Adcyap1r1	174.729	130.063	267.789	124.319	105.152	187.92	-0.457669	7.35089	6.8486	0.00887	0.455
Bmp4	5.81977	4.02494	4.03003	8.47371	5.81155	10.4762	0.792139	2.68875	6.87058	0.00876	0.455
Gm16705	0.949859	1.57164	1.29702	0.625576	0.458807	0.724999	-1.1128	-0.0386178	6.84963	0.00887	0.455
Klhl33	0.934782	1.68664	1.15805	0.246439	0.594749	0.833749	-1.28565	-0.0834647	6.84956	0.00887	0.455
Neat1	11.4134	8.70154	11.6732	15.2034	11.3512	26.3175	0.639097	3.79788	6.85344	0.00885	0.455
Sparcl1	4457.42	2615.37	4126.94	2446.08	2488.91	2973.94	-0.518026	11.6327	6.84993	0.00886	0.455
Gm12824	1.56802	1.53331	2.87198	3.45015	2.1411	5.61874	0.873631	1.49291	6.82594	0.00898	0.457
Sorcs2	38.4618	27.1204	66.426	29.3452	19.3379	36.0687	-0.59144	5.16017	6.82609	0.00898	0.457
Mrap	1.26648	0.709156	1.43599	1.9336	1.88621	2.93624	0.957523	0.769617	6.81924	0.00902	0.458
Emcn	8.5035	2.91329	2.59404	10.7106	6.83112	11.0925	1.07718	2.84227	6.80962	0.00907	0.458
Olig1	34.7679	25.3188	52.4831	24.17	21.4959	32.3349	-0.510592	4.97705	6.78919	0.00917	0.462
Aldh4a1	73.9382	56.1192	112.563	46.2547	48.5146	89.3198	-0.432089	6.13248	6.73591	0.00945	0.468
Asb2	0.859396	0.939153	0.741155	2.5023	0.798664	3.37124	1.26621	0.62507	6.72902	0.00949	0.468
Igfbp3	12.3331	5.86491	7.82845	16.2081	8.85327	30.5224	0.939727	3.73703	6.74538	0.0094	0.468
Myo1d	3.73913	2.2233	3.28888	7.22256	2.87179	9.53373	1.00147	2.25441	6.72966	0.00948	0.468
Nkx2-2	1.29663	0.651657	2.54772	0.549749	0.254893	1.305	-1.18545	0.0697363	6.76151	0.00931	0.468
Oplah	54.7149	33.7712	65.7775	29.4589	31.0799	50.8587	-0.504122	5.45365	6.7285	0.00949	0.468
Pla2g5	0.497545	0.249163	0.694833	0.30331	1.03656	5.40124	1.50511	0.316378	6.7261	0.0095	0.468
Edn1	2.92496	1.24581	0.694833	5.15626	1.88621	4.56749	1.32909	1.49506	6.7028	0.00963	0.472
Abi3bp	2.60834	1.28415	2.5014	3.56389	2.80382	6.63374	0.918966	1.67397	6.65003	0.00992	0.484
Arhgef10	30.0638	21.1788	46.8781	17.7815	17.4516	37.0474	-0.489295	4.80409	6.6486	0.00992	0.484
Ndrg2	3282.59	2818.82	2951.09	2429.26	2128.81	2256.27	-0.4252	11.3728	6.63622	0.00999	0.486
Frmpd1	13.3433	6.82323	17.4635	5.45957	6.06644	12.6875	-0.70711	3.34036	6.62055	0.0101	0.488
Icosl	24.0028	20.163	38.6327	15.3361	16.9079	27.985	-0.474735	4.55734	6.60354	0.0102	0.491
Nptxr	6.57363	6.09491	18.6215	3.7345	3.53451	15.805	-0.627149	3.12083	6.56494	0.0104	0.501
Lsm12	32.8983	34.1928	33.4446	45.7429	46.1696	44.5512	0.423928	5.30835	6.54627	0.0105	0.504
Foxs1	0.618162	0.459993	0.880122	1.6682	0.968592	1.45	1.09905	0.0589333	6.52009	0.0107	0.505
Gata2	5.84993	1.82081	3.28888	9.45947	4.18024	10.7662	1.10903	2.55709	6.5226	0.0107	0.505
Lyplal1	32.5063	25.0313	18.6215	19.7151	21.0881	13.775	-0.491104	4.46606	6.52429	0.0106	0.505
Ppp1r3g	14.3233	9.02736	19.9185	9.49738	6.69518	10.005	-0.692704	3.52492	6.53472	0.0106	0.505
Scarf1	1.11571	0.440827	0.972766	1.89568	1.17251	2.755	1.12468	0.487242	6.51405	0.0107	0.505
Ptprb	18.0322	2.95162	12.4607	31.9423	10.8244	45.9287	1.30929	4.31878	6.50121	0.0108	0.508
Akr1b8	13.8559	9.88985	9.07915	9.09929	6.15141	5.43749	-0.681562	3.18195	6.49091	0.0108	0.509
Ccdc153	0.0150771	0.517492	0.324255	1.47863	0.322864	2.42875	2.10872	-0.260736	6.47888	0.0109	0.511
Cldn11	2.59327	1.72497	6.06821	4.37903	2.5999	12.9412	0.811617	2.26882	6.44737	0.0111	0.518
Aldh3b1	22.6911	19.0705	21.9567	15.2223	14.3759	16.0587	-0.497106	4.19237	6.41874	0.0113	0.525
Actg2	0.618162	0.709156	0	3.12788	0.203914	1.305	2.26778	0.122245	6.40152	0.0114	0.529
Plcd4	82.1251	47.8201	58.7829	44.9656	41.3096	47.3062	-0.512572	5.74992	6.37828	0.0116	0.534
Ifitm1	18.8916	10.599	15.379	30.2551	18.0464	23.5262	0.669537	4.28863	6.36876	0.0116	0.534
Lrtm2	33.2601	23.0955	51.5566	19.9426	21.0201	37.4099	-0.476973	4.93626	6.36714	0.0116	0.534
Abca4	0.934782	0.402494	2.5014	0.834101	1.35943	8.40999	1.04718	1.13804	6.32783	0.0119	0.535
Acss1	126.512	70.6089	165.972	76.7752	61.1402	114.949	-0.53232	6.666	6.3106	0.012	0.535
Chrna7	2.53296	1.11165	2.82565	0.890972	0.917613	1.45	-1.00867	0.697169	6.33623	0.0118	0.535
Cldn2	6.43793	4.81076	7.64316	6.12306	7.47685	31.8999	0.836391	3.35759	6.33273	0.0119	0.535
Ctla2a	9.86044	3.21995	1.89921	16.1702	6.50826	6.52499	1.09839	2.9288	6.35851	0.0117	0.535
Egfl7	23.2489	19.1089	15.7959	37.0417	19.8137	33.3499	0.626877	4.63249	6.31686	0.012	0.535
Gm10925	3.1662	2.20413	0.972766	6.74864	4.43513	1.305	0.889059	1.74518	6.30648	0.012	0.535
Kirrel2	12.7854	6.4399	9.07915	6.10411	3.72143	6.63374	-0.810266	2.90605	6.34396	0.0118	0.535
Lrrc32	4.82468	2.52996	7.59684	5.55436	4.58807	21.8225	0.800049	2.89965	6.31873	0.0119	0.535
Pnpla7	40.2559	29.5737	47.6655	23.3359	25.6422	39.0049	-0.45453	5.086	6.3331	0.0119	0.535
Stra6	13.4036	10.0623	18.4362	15.2603	14.9537	34.9087	0.532085	4.12521	6.32402	0.0119	0.535
BC020535	2.68373	1.07332	1.62128	4.72026	2.20907	4.60374	1.06966	1.5152	6.2884	0.0122	0.537
Cnp	182.931	142.598	189.134	116.3	127.582	150.075	-0.405757	7.23863	6.27666	0.0122	0.537
Dpp10	2.00526	1.05415	1.76024	0.815144	0.543771	1.05125	-1.04857	0.303377	6.27613	0.0122	0.537
Fign	0.165848	0.134165	0.463222	0.379137	0.339857	1.12375	1.23048	-1.22555	6.27507	0.0122	0.537
Il34	19.148	13.8956	15.379	17.4782	23.2972	35.7424	0.58361	4.36402	6.27158	0.0123	0.537
Anks1	63.2485	54.7775	117.751	46.1978	48.3956	80.1124	-0.414789	6.07762	6.19926	0.0128	0.558
She	2.69881	0.249163	1.62128	3.94302	2.41298	8.51874	1.51599	1.66114	6.17845	0.0129	0.561
Slc6a7	2.71388	1.16915	2.64037	0.568705	0.883628	2.06625	-1.08177	0.73092	6.18169	0.0129	0.561
Acad11	36.1851	22.8272	41.69	21.3454	20.5274	30.0512	-0.501912	4.83697	6.16713	0.013	0.563
Lox	0.889551	0.939153	1.80657	2.0663	0.849642	6.81499	1.07051	1.07271	6.14934	0.0131	0.567
Igf1	4.76437	3.41162	4.07635	6.17993	5.31876	9.75123	0.72197	2.474	6.1414	0.0132	0.568
Jph2	0.301543	0.440827	0.277933	1.99047	0.101957	2.21125	1.93951	-0.154807	6.1349	0.0133	0.569
Hs6st2	2.81942	3.04745	4.49325	4.07572	4.06129	10.9112	0.718573	2.25471	6.12682	0.0133	0.57
F11r	7.01086	2.49163	6.39246	10.4073	5.2338	17.4725	0.951433	3.00158	6.11889	0.0134	0.57
Tns1	42.1707	27.9637	58.4586	67.1072	37.2483	90.1536	0.579828	5.73126	6.11534	0.0134	0.57
Galr1	0.196003	0.536659	0.277933	0.265396	2.36201	0.833749	1.73904	-0.280492	6.09387	0.0136	0.575
1700026D08Rik	0.467391	0.134165	0.370578	0.701403	0.4758	1.885	1.36132	-0.583187	6.07212	0.0137	0.576
Col5a2	5.97054	4.46577	6.85569	7.41213	6.83112	14.8262	0.649117	2.9261	6.0745	0.0137	0.576
Emp3	28.0736	17.7481	22.6979	50.956	22.6345	37.8087	0.692355	4.91193	6.0735	0.0137	0.576
Hbb-b2	5.88008	2.3958	2.82565	10.0092	5.33575	5.65499	0.917945	2.45644	6.07834	0.0137	0.576
Pdk4	17.9116	14.7006	24.1802	10.5969	12.3028	17.8712	-0.502846	4.01128	6.06203	0.0138	0.578
Ccdc146	0.42216	0.325828	0.4169	0.796188	0.4758	1.99375	1.19806	-0.449075	6.02914	0.0141	0.585
Dynlt1a	8.56381	8.50987	7.9211	14.5209	15.2596	9.09873	0.597069	3.43772	6.01368	0.0142	0.585
Gabrg1	38.9291	14.8923	39.7908	13.7816	17.0608	29.2174	-0.698085	4.66027	6.00728	0.0142	0.585
Marveld1	10.1921	9.67902	15.101	16.7579	9.60096	32.9512	0.631359	3.94086	6.01832	0.0142	0.585
Pde1c	12.2879	9.96652	11.3953	6.52116	5.18282	11.165	-0.648582	3.22914	6.0203	0.0141	0.585
Rerg	23.9274	23.4021	21.9567	25.1747	59.7638	28.5287	0.667614	4.9407	6.03504	0.014	0.585
Vwf	17.399	4.25494	14.6841	28.549	8.22454	65.3224	1.21929	4.47479	6.01191	0.0142	0.585
1700112E06Rik	1.83941	4.25494	1.38967	0.815144	0.866635	1.6675	-1.21996	0.909477	5.98583	0.0144	0.587
Cpe	6805.98	5121.62	6562.37	4860.42	4453.96	4511.3	-0.43305	12.3973	5.98055	0.0145	0.587
Crb3	0.120617	0.114998	0.555866	0.0568705	0.577757	2.42875	1.64642	-0.791123	5.98003	0.0145	0.587
Perp	14.5494	7.30239	8.56961	12.0186	14.8687	33.4587	0.821493	3.88847	5.98014	0.0145	0.587
Acvrl1	9.69459	2.4533	6.48511	13.5541	7.40888	18.5237	1.01948	3.26051	5.93021	0.0149	0.592
Adamts5	0.256311	0.134165	0.926444	0.796188	0.305871	1.84875	1.27994	-0.579627	5.89081	0.0152	0.592
Cd93	3.48282	1.37998	2.17714	6.91925	2.42998	5.72749	1.0813	1.90058	5.9373	0.0148	0.592
Fahd1	37.8888	39.3294	28.4418	59.6572	59.322	31.1024	0.447411	5.43721	5.91385	0.015	0.592
Gm11547	0.482468	0.21083	0.185289	1.08054	0.441814	0.833749	1.37839	-0.746739	5.93604	0.0148	0.592
Gm11744	1.37202	3.33495	1.29702	3.10892	3.92535	5.72749	1.03858	1.65721	5.91978	0.015	0.592
Gpld1	131.895	87.7437	176.719	95.1065	81.5317	100.557	-0.493184	6.80473	5.9053	0.0151	0.592
Pcsk6	118.159	84.9454	185.104	80.5097	77.9292	130.101	-0.423554	6.80085	5.94557	0.0148	0.592
Pkdrej	0.663394	0.364161	1.29702	0.208525	0.305871	0.434999	-1.19713	-0.883124	5.89959	0.0151	0.592
Retsat	69.5206	49.8901	75.0883	40.5297	47.2571	59.0511	-0.428233	5.823	5.91937	0.015	0.592
Rhobtb1	3.30189	2.20413	2.5014	5.81975	4.38415	3.69749	0.778334	1.90855	5.89329	0.0152	0.592
Sorcs3	5.56346	4.23577	4.95648	2.21795	2.39599	4.74874	-0.770903	2.00519	5.93867	0.0148	0.592
Steap1	1.82433	0.747489	2.13082	1.61133	2.02215	11.31	1.10042	1.61618	5.95645	0.0147	0.592
Tc2n	0.180926	0.134165	0.0926444	0.189568	0.305871	2.755	1.79398	-0.852129	5.89235	0.0152	0.592
Tmco4	14.5494	13.4165	18.9921	9.11824	8.64936	16.5662	-0.520498	3.74602	5.89598	0.0152	0.592
Tns4	0.0603085	0	0.648511	0.0189568	0.101957	3.58874	1.72923	-0.73266	5.91436	0.015	0.592
Aldoc	6029.86	5919.57	4997.93	5266.99	4037.94	3473.36	-0.430944	12.287	5.87192	0.0154	0.597
Hrct1	2.42742	1.14998	1.20438	4.24633	1.88621	3.84249	1.04385	1.33141	5.86624	0.0154	0.597
Wfdc2	0.256311	0.249163	0.787477	0.151655	0.832649	4.02374	1.41638	-0.0776883	5.85871	0.0155	0.598
Nov	7.47826	2.72163	9.72766	11.6774	5.74358	21.5687	0.888822	3.25741	5.85391	0.0155	0.599
Eps8l1	3.07573	1.26498	4.40061	3.14684	6.83112	6.56124	0.975775	2.06442	5.83889	0.0157	0.599
Fbf1	48.096	46.651	56.8373	30.5016	37.7921	49.0824	-0.404998	5.47913	5.83919	0.0157	0.599
Gprc5b	27.1388	29.8804	41.8289	55.4677	53.3235	38.0624	0.566672	5.36571	5.83446	0.0157	0.599
Hist1h1b	54.0666	69.3248	21.6325	28.5869	48.5825	19.5025	-0.528869	5.36165	5.84231	0.0156	0.599
Gpr4	6.5284	5.63492	4.95648	8.83389	7.78272	10.2225	0.623253	2.88125	5.82592	0.0158	0.6
Ushbp1	4.44775	2.29997	2.22347	6.19889	3.5685	7.72124	0.919785	2.14747	5.80933	0.0159	0.605
Cp	60.4291	28.5579	45.9979	69.7043	49.0583	95.7723	0.618673	5.8498	5.78046	0.0162	0.61
Esam	23.3997	7.41739	9.63502	36.1318	13.7132	28.8187	0.981085	4.31725	5.78472	0.0162	0.61
Myof	3.54312	1.74414	2.36243	4.68234	2.58291	12.1075	1.05101	2.12814	5.77669	0.0162	0.61
Zic3	3.46774	1.01582	1.85289	4.22738	3.24563	6.08999	1.03605	1.73437	5.78679	0.0161	0.61
Klf2	19.6757	9.60236	13.6187	27.1652	14.9027	29.8699	0.714494	4.25292	5.76799	0.0163	0.61
Sdpr	14.4137	4.29327	8.15271	17.137	10.4676	27.4775	0.943333	3.75125	5.76602	0.0163	0.61
Tie1	6.27208	0.939153	4.86383	10.0661	4.72401	15.2612	1.23418	2.78629	5.74717	0.0165	0.615
Ch25h	0.467391	0.709156	0.8338	1.06158	0.900621	2.465	0.984149	0.0850105	5.72764	0.0167	0.619
Gpr182	18.5599	8.81653	22.9758	16.9474	20.1365	46.5812	0.615491	4.44344	5.72879	0.0167	0.619
Chl1	45.8495	61.7732	46.9244	63.4865	118.916	56.3324	0.573344	6.04892	5.72046	0.0168	0.62
Paqr5	10.75	2.85579	3.01094	13.1181	7.27294	14.21	1.10451	3.09986	5.71578	0.0168	0.62
Fam69c	42.0953	36.7994	53.919	31.3925	29.6525	40.4187	-0.401112	5.28067	5.68128	0.0171	0.626
Gimap6	5.17145	1.80164	1.85289	8.09457	3.92535	5.21999	1.00072	2.15811	5.6802	0.0172	0.626
Onecut2	1.43233	1.45664	1.43599	2.38856	3.5515	1.9575	0.849945	1.0863	5.6934	0.017	0.626
Rbp1	65.6609	37.7194	56.5131	92.9644	57.8436	86.1661	0.555542	6.04573	5.68704	0.0171	0.626
Tgm2	13.0869	3.64161	18.4826	18.1607	8.19055	57.4561	0.975489	4.24454	5.67878	0.0172	0.626
Uty	16.6451	4.02494	0	1.61133	5.4547	0	-1.51011	2.3051	5.66569	0.0173	0.629
Wdr72	0.0150771	0.0191664	0.277933	0.0379137	0.0169928	1.92125	1.97157	-1.66707	5.66306	0.0173	0.629
Tst	57.278	46.536	96.6281	45.7997	32.4393	68.8024	-0.449005	5.83827	5.64651	0.0175	0.633
Cmtm8	4.35729	3.04745	2.45508	7.92396	4.24821	4.82124	0.786736	2.20085	5.63401	0.0176	0.635
Col3a1	29.0385	9.62152	25.0603	27.3737	25.6592	67.6424	0.767668	4.90468	5.63233	0.0176	0.635
1700094D03Rik	1.9751	1.57164	1.6676	2.59709	2.379	5.18374	0.829908	1.35032	5.61975	0.0178	0.638
Cyb5d2	33.7125	30.8387	37.8452	22.1795	26.4748	29.2174	-0.414206	4.9071	5.59506	0.018	0.646
Cer1	3.48282	1.78247	1.34334	1.68716	1.1895	0.616249	-0.943782	0.851731	5.5785	0.0182	0.649
Cndp1	0.0904628	0	0.277933	0.0947842	0.101957	1.8125	1.71001	-1.53743	5.57688	0.0182	0.649
Myo6	183.021	113.58	221.652	104.774	113.835	168.852	-0.439547	7.22469	5.56441	0.0183	0.652
Foxp1	23.8068	20.5847	27.9786	29.4969	28.48	40.1287	0.41342	4.81934	5.54941	0.0185	0.655
Ptprn	46.9049	38.2178	71.5215	28.9281	29.6015	67.6061	-0.404435	5.53362	5.54897	0.0185	0.655
Capg	53.8253	48.3376	38.7717	36.2834	32.7962	37.5912	-0.410221	5.37389	5.54245	0.0186	0.656
Tet1	11.534	14.4323	20.1038	19.4876	22.6685	23.0912	0.516886	4.21025	5.53165	0.0187	0.658
Cyp4f14	23.7465	16.1956	24.9677	16.3218	13.1015	15.8775	-0.523403	4.20012	5.52311	0.0188	0.66
Acox1	248.305	168.53	302.438	161.323	158.441	223.481	-0.415393	7.70719	5.51007	0.0189	0.662
Spint2	19.54	25.453	18.7605	25.1937	25.0305	56.4049	0.605047	4.80439	5.51305	0.0189	0.662
Map3k8	1.89972	0.881653	0.741155	2.46439	1.58033	4.09624	1.10089	0.972455	5.49147	0.0191	0.667
Cdh3	0.0301543	0	0.602189	0.0379137	0.0679714	2.1025	1.64907	-1.37622	5.48095	0.0192	0.669
Cyp4f15	34.7377	28.6729	29.2293	24.9472	18.5562	24.6862	-0.45923	4.74919	5.47969	0.0192	0.669
Rem1	0.482468	0.536659	0.694833	1.13741	0.526778	2.755	1.09812	-0.00690087	5.44133	0.0197	0.682
Ccdc108	0.165848	0.249163	0.972766	0.284353	0.339857	3.95124	1.13003	-0.20191	5.41337	0.02	0.687
Dner	56.4789	26.2771	57.2542	23.4686	28.599	46.1824	-0.563973	5.29538	5.4187	0.0199	0.687
Eif4ebp2	9.37797	9.0657	14.4062	30.9755	13.6792	13.5937	0.82636	3.94544	5.42356	0.0199	0.687
Samd3	0.0301543	0.0383328	0.138967	0	0.135943	1.8125	2.09625	-1.68315	5.41252	0.02	0.687
Cdh5	5.92531	1.66748	6.29982	8.5685	4.38415	16.4937	0.966926	2.81433	5.40259	0.0201	0.689
1700007G11Rik	0.301543	0.42166	0.4169	0.66349	0.696707	1.0875	1.03523	-0.673003	5.3876	0.0203	0.692
S100b	85.5476	60.0099	83.7042	66.1594	43.5017	54.6287	-0.488892	6.03842	5.39027	0.0202	0.692
Otoa	1.9148	0.747489	1.2507	0.587662	0.35685	0.978748	-1.14329	0.0141486	5.3736	0.0204	0.696
Ifi35	8.97089	6.6124	6.6704	13.3646	8.20754	13.63	0.638238	3.26417	5.35984	0.0206	0.696
Itga3	7.96072	6.6699	13.0629	11.1466	9.48201	20.2275	0.524458	3.48815	5.35771	0.0206	0.696
Nfatc2	37.4667	11.8832	58.7365	11.1656	13.6453	50.1699	-0.749968	4.88542	5.3595	0.0206	0.696
Pion	57.4137	47.571	73.606	35.6768	41.9383	62.7124	-0.385525	5.71909	5.36518	0.0205	0.696
Gadl1	2.38219	2.1658	2.82565	1.32698	0.900621	2.2475	-0.818406	0.981748	5.3335	0.0209	0.701
Htra1	664.042	502.753	578.796	463.931	471.025	410.748	-0.393718	9.01432	5.338	0.0209	0.701
Lims2	12.4537	5.57742	4.91015	15.9996	8.93824	14.3187	0.804955	3.38616	5.32627	0.021	0.701
Sema3g	1.22125	0.862487	1.43599	1.49759	2.1411	2.79125	0.83326	0.740268	5.32942	0.021	0.701
Ucp3	2.80435	1.68664	4.5859	1.15637	1.56334	2.3925	-0.810298	1.21426	5.33509	0.0209	0.701
Itpr1	16.7205	13.8573	20.8913	20.9094	17.7745	35.0899	0.458421	4.36439	5.31548	0.0211	0.704
Aldh6a1	328.003	214.625	421.254	177.322	221.366	333.826	-0.425049	8.1272	5.30148	0.0213	0.704
Caskin1	66.5504	55.9083	115.064	55.3919	43.0429	76.5599	-0.420068	6.08861	5.29971	0.0213	0.704
Crb2	4.76437	2.70246	12.1827	2.46439	2.20907	7.57624	-0.69557	2.34936	5.30471	0.0213	0.704
Srcin1	27.8776	28.4237	49.9817	18.6915	23.3822	40.1287	-0.405038	4.95277	5.30502	0.0213	0.704
Gfap	3266.38	2161.81	4187.76	2072.8	1823.33	3448.17	-0.426318	11.4486	5.28603	0.0215	0.708
Cpne7	24.44	10.6757	18.4826	6.42637	6.95007	23.9975	-0.828625	3.89462	5.27401	0.0216	0.71
Htr2c	0.618162	0.191664	1.85289	0.151655	1.35943	13.2675	1.52468	1.36995	5.25105	0.0219	0.71
Lrrc33	7.40287	5.28992	7.68948	3.50702	4.12926	5.90874	-0.63456	2.496	5.25745	0.0219	0.71
Mylip	7.67426	4.5041	10.3762	8.28414	8.20754	20.6262	0.604528	3.27697	5.25306	0.0219	0.71
Ngef	103.474	74.6722	139.939	76.6236	56.6881	104.944	-0.430431	6.52211	5.26901	0.0217	0.71
Plekhb1	335.165	338.459	409.535	268.258	269.71	317.368	-0.356602	8.33318	5.25049	0.0219	0.71
Thbs1	3.61851	1.59081	5.37337	3.37432	3.77241	16.095	0.812813	2.42239	5.26782	0.0217	0.71
Ttyh1	720.626	707.469	1143.83	554.62	616.16	815.587	-0.372037	9.55885	5.2577	0.0218	0.71
Gm7846	0.482468	0.479159	0.0926444	0.909929	1.01957	0.25375	1.06733	-0.640351	5.24054	0.0221	0.713
Igdcc4	82.6679	60.9108	168.566	64.5102	52.287	105.995	-0.435321	6.45616	5.2284	0.0222	0.713
Lrrc34	0.10554	0.0766655	0.138967	0.284353	0.0509785	1.99375	1.80914	-1.32623	5.23178	0.0222	0.713
S100a10	92.6942	79.253	49.0089	161.285	120.054	50.1699	0.475919	6.5575	5.23336	0.0222	0.713
C130074G19Rik	1.11571	0.574991	1.06541	2.65396	0.985585	2.13875	1.06241	0.547125	5.20396	0.0225	0.72
Tril	102.947	64.514	191.125	65.875	58.7612	145.072	-0.430568	6.68148	5.20666	0.0225	0.72
Hap1	135.106	95.7936	166.899	82.2538	78.354	155.512	-0.39856	6.87655	5.19651	0.0226	0.722
AU021034	0.165848	0.42166	0.463222	0.530792	0.645728	1.26875	1.13374	-0.755557	5.17786	0.0229	0.728
Fam198a	11.0666	7.03406	16.7223	7.37421	5.53967	9.31623	-0.617406	3.23473	5.16678	0.023	0.731
Isyna1	60.218	34.8445	72.4942	68.8702	53.3405	122.96	0.482928	6.07855	5.15365	0.0232	0.735
Tpm1	106.806	103.518	90.5136	166.612	96.8592	159.717	0.47582	6.91476	5.14317	0.0233	0.738
Mfn1	143.836	83.3546	128.776	81.8746	76.4508	107.409	-0.448459	6.68895	5.13194	0.0235	0.741
Ctnna3	2.68373	1.34165	2.31611	0.947842	1.24048	1.305	-0.87616	0.743688	5.11629	0.0237	0.745
Etohi1	3.0305	3.79494	2.59404	1.47863	1.54635	2.6825	-0.805263	1.35762	5.11601	0.0237	0.745
Ddo	65.0729	49.2384	66.1018	45.5723	40.5449	53.2149	-0.39172	5.73298	5.10309	0.0239	0.747
Gm15964	0.10554	0.134165	1.34334	0.0379137	0.0509785	0.543749	-1.37413	-1.70542	5.10072	0.0239	0.747
Ly6c1	75.2801	14.7389	13.3408	124.054	42.3292	35.5249	1.05982	5.70521	5.10259	0.0239	0.747
Mgll	578.615	586.549	507.182	498.812	417.701	394.109	-0.368463	8.96668	5.07656	0.0243	0.755
Sardh	43.2412	29.4587	64.8974	29.6864	24.4527	49.0462	-0.432157	5.30769	5.07437	0.0243	0.755
1700012B09Rik	0.0301543	0.0766655	0.138967	0.398094	0	1.0875	2.22601	-1.83197	5.05925	0.0245	0.758
Gm11410	0.331697	0.459993	0.277933	1.19428	0.628735	0.507499	1.11817	-0.646519	5.05701	0.0245	0.758
Pcdhb19	2.15603	1.74414	3.42784	2.46439	3.7894	6.12624	0.712449	1.69106	5.05956	0.0245	0.758
Hmcn1	0.844319	0.555825	0.602189	2.23691	0.883628	1.0875	1.05964	0.151362	5.03465	0.0248	0.766
Gpc5	103.655	79.5021	127.571	77.3629	67.6485	94.5761	-0.383136	6.51224	5.00801	0.0252	0.775
Tox2	8.8352	5.76908	8.66225	4.20842	4.80897	6.59749	-0.612777	2.69383	5.00992	0.0252	0.775
Npr3	1.41725	0.68999	1.71392	1.38385	1.41041	7.97499	0.978486	1.19208	4.97056	0.0258	0.79
Alox12	0.738779	0.172497	0.926444	0.966799	0.968592	2.13875	1.09786	-0.0345593	4.96658	0.0258	0.79
Gpr30	4.07082	4.52327	4.72486	5.64914	6.20239	9.06248	0.598736	2.50805	4.95811	0.026	0.793
Ly6a	48.1262	10.1007	10.6078	77.7231	25.0135	30.4499	1.0501	5.10255	4.9542	0.026	0.793
Mmrn2	3.6939	0.574991	2.31611	6.97612	1.71628	9.09873	1.3338	2.00465	4.93833	0.0263	0.797
Sigirr	2.12587	0.68999	0.694833	3.56389	1.9032	1.63125	1.02858	0.914724	4.93854	0.0263	0.797
Gm14412	1.31171	1.05415	1.89921	0.0758274	0.526778	1.885	-1.3214	0.120048	4.9286	0.0264	0.8
1300014I06Rik	6.78471	8.06905	5.88292	9.38364	8.70034	14.6812	0.598168	3.15221	4.91194	0.0267	0.804
Alas2	3.00035	1.03498	2.0845	2.78666	4.16325	4.67624	0.888401	1.57639	4.9119	0.0267	0.804
Pgm2	156.953	118.64	149.296	120.945	92.3901	111.65	-0.399479	6.96745	4.90633	0.0268	0.804
Rbms3	13.1925	10.6757	16.6297	13.194	17.0608	28.8549	0.472746	4.03045	4.90549	0.0268	0.804
Fgfr3	232.384	157.605	391.839	164.318	143.233	278.436	-0.406672	7.8125	4.8992	0.0269	0.805
Ntrk2	1182.7	922.689	1242.92	901.493	798.868	885.803	-0.383296	9.95005	4.89703	0.0269	0.805
Acsbg1	565.649	384.918	651.058	406.928	348.863	449.245	-0.412648	8.86471	4.86629	0.0274	0.812
Atp11c	9.12166	9.10403	11.21	9.9713	14.172	19.2487	0.508372	3.5881	4.87621	0.0272	0.812
BC051019	0.0603085	0.383328	0.185289	1.02367	0.220907	0.761249	1.63912	-1.06196	4.86728	0.0274	0.812
D14Ertd668e	0.603085	0.306662	0.602189	1.17532	0.594749	1.48625	1.04438	-0.292221	4.86803	0.0274	0.812
Echdc3	6.42286	6.01824	5.18809	4.60651	3.27962	3.58874	-0.630707	2.30449	4.86563	0.0274	0.812
Kdm5d	12.8759	3.50745	0	1.40281	4.758	0	-1.37435	2.01827	4.85553	0.0276	0.815
Phldb2	13.6599	9.75569	17.0929	16.5683	11.1473	41.7599	0.57476	4.155	4.84612	0.0277	0.818
Ccdc8	13.8559	7.37906	28.7661	4.18946	7.64678	25.2662	-0.641708	3.80583	4.83131	0.0279	0.818
Sema3f	0.542777	0.0383328	0.787477	1.00471	0.220907	5.40124	1.62271	0.266813	4.83238	0.0279	0.818
Slfn2	0.949859	0.191664	0.694833	1.63029	0.798664	1.99375	1.20718	0.0925051	4.83087	0.028	0.818
Sox3	18.1679	19.4155	28.6734	16.3218	13.0335	18.7412	-0.456489	4.24662	4.8321	0.0279	0.818
Bcam	27.4856	16.1573	28.6734	39.5061	18.7261	60.1749	0.623598	4.96646	4.80209	0.0284	0.819
Bdh2	54.534	50.5992	33.5836	42.8425	34.0197	29.2537	-0.384211	5.36815	4.80411	0.0284	0.819
Ccna1	12.7402	12.0557	5.65131	6.46429	4.82597	7.14124	-0.683255	3.05055	4.79632	0.0285	0.819
Clu	4712.4	3576.01	4715.92	3724.4	3047.8	3087.81	-0.411883	11.8995	4.80319	0.0284	0.819
Fn1	29.8829	11.7682	23.2537	41.1364	16.534	66.5549	0.809952	4.94976	4.81409	0.0282	0.819
Ptgis	1.99018	1.72497	1.85289	7.62065	1.25747	3.51624	1.14469	1.62649	4.82214	0.0281	0.819
Spsb3	5.26192	6.13324	10.6541	8.60641	8.7853	14.2462	0.529663	3.14208	4.80167	0.0284	0.819
St8sia1	1.02524	1.16915	1.43599	1.42176	2.53193	2.50125	0.816242	0.772374	4.81965	0.0281	0.819
Tesc	66.5354	76.6272	44.0524	54.2545	41.1057	43.6087	-0.414725	5.77907	4.81588	0.0282	0.819
Tom1l2	135.875	102.329	217.946	85.9314	97.8788	178.422	-0.362482	7.06998	4.79544	0.0285	0.819
Myadm	29.0536	22.4247	37.8916	31.9423	31.6067	57.5286	0.3865	5.11153	4.78807	0.0287	0.82
Pamr1	23.0529	11.059	21.4472	9.74382	10.6715	18.4512	-0.581765	3.96257	4.78918	0.0286	0.82
A930018M24Rik	2.33695	4.2741	0.926444	0.568705	0.730692	1.92125	-1.35364	0.907686	4.73938	0.0295	0.832
Emb	9.0312	6.57407	12.507	5.6681	12.7276	49.4449	0.785047	3.9255	4.73738	0.0295	0.832
Gm12663	0.844319	0.613324	0.694833	4.15155	0.747685	0.869998	1.32266	0.517544	4.75909	0.0291	0.832
Kcnc4	25.7517	25.108	30.9432	15.9048	19.8306	28.0937	-0.406148	4.59211	4.73922	0.0295	0.832
Lcat	156.651	131.309	138.735	117.608	106.443	114.912	-0.347666	6.99906	4.73933	0.0295	0.832
Mertk	75.1293	40.3261	74.8567	38.3876	42.8729	59.5224	-0.462884	5.77587	4.7485	0.0293	0.832
Tmem150a	12.0165	11.9407	10.3762	14.8432	15.5824	17.4725	0.458734	3.78122	4.744	0.0294	0.832
Tpm3	159.833	161.707	115.018	201.777	234.654	135.176	0.353545	7.40921	4.74697	0.0293	0.832
Akap12	17.7759	11.8832	19.2237	20.7957	14.4779	43.5724	0.543776	4.38068	4.72471	0.0297	0.834
Prdm6	1.28156	0.42166	2.59404	1.76299	1.22348	5.87249	0.914186	1.04937	4.72049	0.0298	0.834
Rasa3	149.565	95.8702	203.818	94.2534	91.3875	161.312	-0.395635	7.03468	4.72262	0.0298	0.834
Sema3c	47.0708	60.8724	78.9793	56.1502	145.799	90.6611	0.64454	6.31809	4.72981	0.0296	0.834
Kndc1	13.8257	11.3657	15.9348	8.51162	7.93566	14.1012	-0.487014	3.56806	4.71449	0.0299	0.835
Cobll1	4.07082	1.55248	4.53958	4.60651	3.10969	14.6812	0.850525	2.38104	4.69934	0.0302	0.836
Cxadr	15.7104	18.7256	26.6816	17.2128	40.5959	34.3649	0.596425	4.66529	4.70216	0.0301	0.836
Ift122	63.9723	38.1411	69.5759	33.1366	37.7411	60.5374	-0.434037	5.64399	4.69952	0.0302	0.836
Il18bp	1.32679	0.574991	0.972766	1.42176	1.49537	3.04499	0.916422	0.563149	4.70058	0.0302	0.836
A730056A06Rik	14.1876	11.4423	12.8776	8.15144	11.1643	7.82999	-0.523911	3.46482	4.68511	0.0304	0.841
C4b	79.4866	30.0912	103.901	35.1081	33.5609	80.0399	-0.586493	5.88831	4.68068	0.0305	0.842
Gm12563	0.437237	0.574991	0	1.19428	0.713699	0.18125	1.16468	-0.67652	4.67819	0.0305	0.842
Crabp2	18.3036	7.95405	17.5098	37.5535	13.1525	25.23	0.805029	4.32357	4.67315	0.0306	0.843
Lsr	6.16654	2.47246	6.34614	9.53529	3.72143	16.8562	0.871556	2.87519	4.6597	0.0309	0.846
Smtnl2	4.90007	3.89078	5.65131	2.42648	3.00773	4.16874	-0.627976	2.00018	4.66071	0.0309	0.846
Cish	1.43233	2.97079	3.98371	2.16108	5.43771	8.40999	0.857766	1.98925	4.65321	0.031	0.848
Them4	77.421	73.3114	45.0252	103.561	102.331	51.8737	0.353751	6.2644	4.65026	0.031	0.848
Heph	11.9411	5.36659	15.0547	3.71554	5.33575	13.5937	-0.68907	3.16105	4.64688	0.0311	0.848
Bach1	5.44284	8.98903	8.52328	10.5211	14.206	10.5487	0.604707	3.29088	4.63231	0.0314	0.85
Gstm4	26.8976	27.2738	22.4199	22.5207	18.6411	17.0737	-0.410056	4.50449	4.6365	0.0313	0.85
Kctd4	61.4996	79.253	54.6602	81.4007	110.182	69.8174	0.393522	6.26338	4.63071	0.0314	0.85
St14	3.95021	2.97079	5.97556	2.35065	1.86921	4.24124	-0.656845	1.80902	4.63223	0.0314	0.85
Pecam1	11.6546	2.31913	5.97556	15.4498	6.33833	23.5262	1.07421	3.42029	4.62651	0.0315	0.85
Hspb8	419.235	366.845	314.065	317.641	215.333	300.004	-0.409864	8.33627	4.61887	0.0316	0.851
Myo1b	14.8057	9.98568	16.5833	13.1371	18.8281	29.2537	0.497317	4.07428	4.61901	0.0316	0.851
Gm15998	0.452314	0.134165	0.555866	0.682447	0.492792	1.48625	1.10319	-0.657302	4.61133	0.0318	0.853
Nbeal1	10.2072	8.37571	12.4143	14.6157	10.6715	19.4662	0.497274	3.647	4.60405	0.0319	0.855
Fam189a2	24.5757	20.8914	30.0631	17.2886	14.9707	26.4262	-0.408747	4.47255	4.57067	0.0325	0.861
Gbas	85.4421	81.3996	82.1756	68.3015	49.6871	76.4511	-0.383622	6.20704	4.57484	0.0324	0.861
Gm14443	1.40217	0.747489	0.972766	1.49759	2.10711	2.1025	0.836706	0.606332	4.58585	0.0322	0.861
Gstm2	14.474	8.7782	11.071	17.573	13.6113	18.9587	0.525429	3.81646	4.57181	0.0325	0.861
Hist1h1e	43.8744	62.5591	33.4909	32.2646	45.5408	26.8975	-0.429294	5.3686	4.57081	0.0325	0.861
Mfap5	1.89972	2.41496	1.6676	4.22738	2.379	3.66124	0.761993	1.47089	4.57742	0.0324	0.861
Olfml3	45.3972	23.843	37.1967	40.1696	47.563	64.8511	0.478635	5.41935	4.57778	0.0324	0.861
Pla2g7	1066.96	751.245	951.041	757.08	694.616	695.709	-0.381405	9.68137	4.56592	0.0326	0.862
Acsl3	782.428	555.768	679.222	479.191	575.412	517.504	-0.376667	9.22636	4.55988	0.0327	0.864
Glp2r	0.693548	1.66748	1.11173	0.398094	0.271885	1.26875	-1.17485	-0.133758	4.55632	0.0328	0.864
Myo5c	0.0301543	0.0958319	0.4169	0.0758274	0.169928	1.55875	1.36914	-1.54076	4.55076	0.0329	0.865
Gbp4	0.588008	0.21083	1.06541	1.28907	0.271885	3.84249	1.24544	0.176173	4.54595	0.033	0.866
Sgsm2	34.3155	30.8579	48.4993	19.6014	24.4867	48.9012	-0.391607	5.08367	4.54456	0.033	0.866
Cntnap5c	1.80926	0.651657	1.01909	0.587662	0.4758	0.688749	-1.02522	-0.106659	4.5409	0.0331	0.866
Adamtsl5	2.54803	1.83997	3.7521	3.24162	2.75284	8.33749	0.663704	1.86284	4.49295	0.034	0.874
Akr1b10	40.3012	32.0079	29.7852	29.4021	24.3168	24.6137	-0.392693	4.92072	4.50184	0.0339	0.874
Arvcf	51.217	42.3769	78.933	33.0418	36.8915	70.7236	-0.350722	5.68414	4.48369	0.0342	0.874
Cage1	3.79944	3.58411	3.79842	2.44543	2.70186	1.99375	-0.658507	1.64164	4.51468	0.0336	0.874
Cd200	51.1416	45.9226	42.1069	48.0556	69.7216	66.6999	0.386077	5.7521	4.50035	0.0339	0.874
Cd34	13.102	3.12412	6.6704	19.317	8.87026	14.9712	0.913841	3.47055	4.49993	0.0339	0.874
Fmo5	17.203	11.059	14.7768	9.21303	7.98664	13.8475	-0.52663	3.62127	4.51828	0.0335	0.874
Gm14446	0.663394	1.07332	0.648511	0.227482	0.322864	0.724999	-1.10139	-0.629241	4.48409	0.0342	0.874
Grik1	1.26648	1.32248	1.2507	0.625576	0.390835	1.26875	-0.926258	0.0598493	4.48858	0.0341	0.874
Hhex	1.71879	0.517492	0.4169	2.38856	1.07055	2.50125	1.18131	0.58028	4.48436	0.0342	0.874
Inppl1	47.0708	30.9154	85.7887	25.3832	31.3858	72.3549	-0.404186	5.57678	4.51645	0.0336	0.874
Ly75	1.10063	0.21083	0.787477	1.97151	0.815656	2.175	1.19301	0.265171	4.49763	0.0339	0.874
Plxna1	28.5561	31.9887	42.0606	25.3453	21.8868	32.3349	-0.381878	4.9178	4.49355	0.034	0.874
Wtip	10.2223	12.1707	9.82031	15.6963	11.3002	21.4962	0.533229	3.74353	4.51066	0.0337	0.874
2310022B05Rik	274.313	253.763	696.64	214.971	205.664	573.873	-0.328899	8.49663	4.47628	0.0344	0.875
4930528F23Rik	0.889551	1.09248	0.277933	0.265396	0.492792	0.289999	-1.05787	-0.646619	4.47637	0.0344	0.875
Acot11	102.027	71.1073	159.812	64.0362	72.7124	122.67	-0.370449	6.60542	4.47078	0.0345	0.876
Adnp	3.87482	3.60328	10.3299	0.606619	2.58291	8.91748	-0.909945	2.24502	4.46376	0.0346	0.876
Chrm4	3.01543	3.96744	2.59404	1.72507	1.64831	2.61	-0.734237	1.4028	4.46219	0.0347	0.876
Sez6l	50.9004	47.9543	62.6739	37.8	34.5295	58.6524	-0.349747	5.59677	4.46479	0.0346	0.876
Slc6a6	113.591	133.494	150.871	158.46	160.956	190.022	0.339268	7.2361	4.45516	0.0348	0.878
Ddx46	78.2955	78.1222	70.1781	118.442	89.8582	87.1811	0.36515	6.45307	4.42164	0.0355	0.889
Gm9781	3.79944	6.01824	1.34334	2.00943	2.1411	1.6675	-0.8088	1.57607	4.41983	0.0355	0.889
Grin2c	20.1883	10.6565	40.1613	11.1087	10.3486	30.2687	-0.499098	4.31515	4.42836	0.0353	0.889
Lama1	7.76472	2.4533	6.48511	9.19407	7.64678	11.745	0.754302	2.91004	4.42065	0.0355	0.889
Slc1a3	4380.21	3140.58	4947.67	3294.15	2914.26	3294.61	-0.394169	11.8365	4.41967	0.0355	0.889
Aspn	3.60343	1.80164	2.5014	6.54011	2.20907	6.37999	0.898466	1.94927	4.4117	0.0357	0.891
Tuft1	5.27699	6.01824	8.98651	2.93831	3.94234	7.57624	-0.579347	2.5103	4.41018	0.0357	0.891
2810459M11Rik	272.866	225.473	345.008	203.54	173.072	304.064	-0.345345	7.97652	4.40652	0.0358	0.892
Gm1614	4.34221	2.56829	8.89386	2.21795	1.97117	6.52499	-0.645484	2.09023	4.40104	0.0359	0.893
Hhipl1	2.81942	1.68664	6.34614	1.76299	1.20649	3.22624	-0.741845	1.45452	4.3965	0.036	0.894
Robo4	4.85483	1.01582	2.17714	6.76759	3.0757	7.06874	1.04694	2.06701	4.39184	0.0361	0.895
1500017E21Rik	1.07048	0.785822	1.01909	0.454964	0.271885	0.942498	-0.968848	-0.361557	4.38647	0.0362	0.896
Xirp1	0.135694	0	0.231611	0.341223	0.0339857	1.595	1.85729	-1.48309	4.38361	0.0363	0.896
Rgs5	68.4652	31.2987	53.2705	78.5382	49.789	106.937	0.566941	6.00061	4.3728	0.0365	0.901
1700001C02Rik	0.271388	0.325828	0.277933	0.492878	0.35685	1.74	1.12982	-0.810604	4.36767	0.0366	0.901
Tcea3	1.22125	0.824154	1.29702	1.78194	1.01957	4.67624	0.884695	0.807727	4.36628	0.0367	0.901
Slc31a1	66.8972	49.6218	67.862	66.0077	69.5517	111.07	0.365191	6.15111	4.36321	0.0367	0.901
Arl4a	40.3162	31.8545	25.4772	46.8045	34.6314	52.3812	0.44376	5.26948	4.35558	0.0369	0.904
Ets1	8.72966	3.52661	9.68134	11.431	5.82855	23.49	0.744635	3.34589	4.34741	0.0371	0.905
Fgfrl1	43.4221	39.6169	78.3772	36.3403	28.9218	61.7699	-0.361597	5.56695	4.34641	0.0371	0.905
Gfra2	8.05119	11.289	9.5887	12.1893	16.4321	13.0862	0.50814	3.56821	4.34531	0.0371	0.905
Eno4	0.768933	0.517492	0.741155	0.72036	1.32544	2.06625	0.895771	0.0502545	4.33244	0.0374	0.907
Epm2a	3.07573	4.10161	4.26164	2.29378	1.6653	3.55249	-0.681053	1.65815	4.32961	0.0375	0.907
Foxd2	1.2514	0.862487	3.19623	2.02838	1.30845	6.08999	0.731588	1.21896	4.32198	0.0376	0.907
Gpr83	5.12622	5.13659	4.21532	2.02838	2.99074	4.56749	-0.682915	2.0125	4.33332	0.0374	0.907
Itm2a	268.705	78.103	104.04	318.285	178.816	235.697	0.733186	7.63043	4.32226	0.0376	0.907
Ndufa4l2	5.05084	4.69576	3.84474	6.84342	5.87952	7.86624	0.573223	2.52225	4.33359	0.0374	0.907
Sdsl	21.2135	28.9221	23.7633	21.0611	18.7941	15.515	-0.440255	4.44385	4.3274	0.0375	0.907
Gabra2	100.353	75.8414	58.9218	68.2067	71.2	47.0887	-0.34862	6.15088	4.31909	0.0377	0.907
Apof	2.12587	0.670823	1.34334	3.14684	2.07313	2.61	0.906343	1.04048	4.30974	0.0379	0.911
Fgd5	2.47265	0.555825	1.6676	3.18475	1.64831	6.16249	1.05464	1.36195	4.29947	0.0381	0.915
Adh1	1.61325	0.402494	1.52863	1.72507	1.15551	7.46749	1.07503	1.12878	4.28411	0.0385	0.921
Car3	0.452314	0.306662	0.463222	0.701403	0.526778	1.41375	0.947668	-0.605916	4.27308	0.0387	0.923
Cyp46a1	102.901	90.2928	95.4237	73.4767	70.6053	89.7911	-0.328555	6.44298	4.27158	0.0388	0.923
Egfr	52.2875	37.5853	53.4558	38.4066	35.2941	36.5037	-0.387444	5.403	4.26695	0.0389	0.923
Pam	36.8183	40.9777	49.3331	66.6144	44.0115	59.6674	0.416112	5.63185	4.26556	0.0389	0.923
Qpct	17.9267	16.9239	11.8585	12.8148	13.2374	8.95373	-0.43017	3.79112	4.26627	0.0389	0.923
RP23-381B19.7	0.331697	0.594158	0.741155	0.739317	0.458807	4.63999	1.10095	0.201667	4.27125	0.0388	0.923
Gm5083	2.23141	3.94827	2.59404	4.58756	5.53967	4.02374	0.671015	1.96935	4.26187	0.039	0.923
Acsl6	269.624	177.078	336.253	174.574	165.833	276.515	-0.369992	7.85177	4.24623	0.0393	0.93
Phactr3	62.4645	57.1733	79.072	49.6669	48.6845	60.4286	-0.334005	5.8923	4.2451	0.0394	0.93
Eln	9.13674	4.75326	8.06006	11.9049	6.8821	17.4	0.646162	3.26008	4.22809	0.0398	0.934
Opn3	1.11571	0.574991	1.43599	2.59709	1.37642	1.74	0.920104	0.601391	4.23113	0.0397	0.934
Procr	1.46248	0.939153	0.926444	1.72507	1.86921	2.21125	0.762337	0.655449	4.22964	0.0397	0.934
Ace	3.63359	1.74414	12.2754	3.14684	3.05871	40.9262	0.707213	3.31512	4.21333	0.0401	0.935
Foxl2os	0.286465	0.229997	0.4169	0.701403	0.254893	1.305	1.1056	-0.901689	4.22086	0.0399	0.935
Kirrel	3.27174	3.06662	7.68948	4.92878	4.63905	10.9112	0.546844	2.48397	4.2139	0.0401	0.935
Tlr3	24.9979	16.0423	34.6953	13.63	16.0243	28.0575	-0.431246	4.45443	4.21545	0.0401	0.935
Wnt6	5.68408	2.26163	9.1718	8.32206	4.21422	17.545	0.740486	2.92887	4.22011	0.0399	0.935
Cul9	25.7216	21.5813	36.4556	16.5872	20.2725	28.13	-0.382206	4.61891	4.20536	0.0403	0.938
Sec14l2	25.1486	19.6839	36.9188	16.7199	16.8569	30.8487	-0.381049	4.5879	4.19772	0.0405	0.941
Slc16a4	4.16129	0.804988	1.89921	5.30792	2.88878	6.19874	1.03129	1.83513	4.19553	0.0405	0.941
Xlr	1.29663	0.670823	0.370578	1.91464	1.08754	1.41375	0.948409	0.274293	4.19274	0.0406	0.941
Dio2	44.5378	35.8411	54.9844	27.7339	35.4131	43.6449	-0.361003	5.32589	4.18161	0.0409	0.943
Tbx3	2.8345	0.919986	1.80657	2.88144	2.29403	6.81499	0.912689	1.5237	4.18077	0.0409	0.943
Tgtp1	0.392005	0.0191664	0.602189	0.682447	0.339857	1.77625	1.35854	-0.708471	4.18259	0.0408	0.943
Cxcl14	98.9512	87.2837	133.454	86.8603	67.8524	94.3223	-0.359526	6.56175	4.16769	0.0412	0.945
Fam164a	62.1781	55.755	61.3306	75.0881	92.4411	66.6999	0.361691	6.1141	4.17062	0.0411	0.945
Slc12a2	36.4866	30.1104	62.7666	39.0321	41.4625	89.8636	0.337554	5.61165	4.16949	0.0412	0.945
Spata20	1.56802	0.785822	1.2507	0.417051	0.815656	0.688749	-0.922751	-0.0486872	4.17309	0.0411	0.945
Ctso	173.236	117.413	165.417	109.002	111.915	141.085	-0.355842	7.08613	4.16243	0.0413	0.945
Ttc39a	0.542777	0.517492	0.880122	0.701403	0.917613	2.21125	0.821797	-0.0805189	4.162	0.0413	0.945
AI464131	43.7538	22.578	69.5296	29.4969	19.2019	45.7474	-0.508854	5.24024	4.15622	0.0415	0.945
Plin3	167.492	151.069	153.975	132.11	114.906	134.959	-0.324081	7.15626	4.15866	0.0414	0.945
Efcab4a	3.76928	1.53331	2.22347	5.47853	2.8378	5.11124	0.81504	1.82456	4.1536	0.0415	0.945
Mlc1	1494.94	1248.84	1562.17	1265.5	1020.88	1088.91	-0.363471	10.3253	4.14301	0.0418	0.95
Prmt8	20.2787	22.9805	27.4227	24.7008	33.5099	35.3437	0.388031	4.76918	4.14015	0.0419	0.95
C230096C10Rik	83.0297	45.7693	115.528	45.1173	51.7262	87.7611	-0.421502	6.13927	4.13053	0.0421	0.95
Galntl1	73.0185	52.7075	105.151	57.5719	45.2349	72.0286	-0.388647	6.06833	4.1293	0.0421	0.95
Ppp1r32	0.0452314	0.268329	0.0926444	0.322266	0.203914	1.19625	1.54921	-1.48325	4.12935	0.0421	0.95
Slc27a1	304.905	301.717	454.05	251.311	254.519	348.507	-0.319588	8.30898	4.13017	0.0421	0.95
Arap1	34.5869	18.6872	55.8182	21.08	16.1602	44.4787	-0.465919	4.96155	4.11278	0.0426	0.955
Arrb1	61.1076	55.295	91.1621	48.8708	46.6114	70.8324	-0.328205	5.9498	4.11079	0.0426	0.955
Capn9	3.79944	6.45907	2.36243	3.12788	3.12668	1.6675	-0.665863	1.83942	4.11601	0.0425	0.955
Gaa	292.029	224.63	395.499	201.17	197.797	344.701	-0.330628	8.09238	4.11206	0.0426	0.955
Etv5	27.1087	18.3422	47.017	20.0184	16.7719	30.3049	-0.42788	4.71374	4.10573	0.0427	0.957
Cyyr1	0.738779	0.0958319	0.787477	1.5355	0.441814	2.175	1.2992	-0.0640935	4.09439	0.043	0.958
Epha4	123.195	169.469	152.678	178.574	298.258	159.935	0.469934	7.50504	4.09651	0.043	0.958
Plcxd2	4.62868	7.53239	12.8312	7.69648	14.3759	15.0437	0.628428	3.35533	4.09481	0.043	0.958
Synpo2	9.33274	9.65986	11.4879	15.81	11.6401	15.0437	0.470811	3.60784	4.09338	0.0431	0.958
Cd74	2.14095	1.37998	6.90201	3.29849	1.97117	12.3975	0.65457	2.14	4.08823	0.0432	0.959
1110017D15Rik	0.980013	0.709156	0.463222	1.5355	0.781671	2.28375	0.972839	0.209146	4.05107	0.0441	0.961
Col2a1	1.76402	1.30331	2.54772	1.11845	0.560764	1.6675	-0.798935	0.565643	4.05598	0.044	0.961
Exoc3l	3.63359	4.71493	1.99185	5.32687	6.6442	3.51624	0.592624	2.15891	4.06311	0.0438	0.961
Fkbp10	90.8246	67.5232	108.209	69.6854	52.5419	86.7461	-0.368902	6.30004	4.05463	0.0441	0.961
Gbp6	7.10133	3.56495	7.78213	3.98094	2.78683	5.03874	-0.658395	2.32682	4.06078	0.0439	0.961
Gm5884	1.74895	2.24247	2.0845	1.51655	1.24048	0.869998	-0.754684	0.74783	4.07375	0.0436	0.961
Grrp1	3.15112	1.20748	1.85289	4.94774	2.39599	3.91499	0.84688	1.57374	4.06887	0.0437	0.961
Itih3	185.524	153.657	225.821	150.479	140.786	154.171	-0.345158	7.39423	4.0619	0.0439	0.961
Klhdc8b	79.954	93.5319	104.596	68.6238	59.1861	98.7448	-0.339558	6.38617	4.06649	0.0437	0.961
Mtap4	367.565	297.156	477.721	240.562	292.005	387.874	-0.331217	8.41417	4.05601	0.044	0.961
Nexn	2.12587	2.2808	1.06541	4.4359	2.15809	2.50125	0.761254	1.34557	4.05249	0.0441	0.961
Nid1	25.0733	10.8098	24.5044	24.8145	22.1417	44.7687	0.535204	4.64075	4.0736	0.0436	0.961
Odf3b	0.784011	1.01582	0.787477	1.72507	1.01957	2.06625	0.82988	0.341108	4.07944	0.0434	0.961
Plcb3	61.1227	41.0736	82.6388	42.3117	34.7843	67.6786	-0.380969	5.76285	4.06199	0.0439	0.961
Bmpr1b	33.7275	17.5181	43.0333	18.3123	18.3183	33.4224	-0.458513	4.756	4.04254	0.0444	0.964
Pcdh18	2.75911	1.64831	5.74395	3.88615	3.48353	7.82999	0.626188	2.03936	4.03287	0.0446	0.967
Pla2g4e	2.87973	4.29327	3.19623	1.61133	1.51236	3.76999	-0.753731	1.52662	4.03293	0.0446	0.967
Arl15	21.8618	21.7922	27.0058	28.6059	32.5073	30.7762	0.370907	4.76094	4.02731	0.0448	0.967
Vwa5b1	0.271388	0.0958319	0.926444	0.265396	0.254893	3.91499	1.07084	-0.27048	4.02899	0.0447	0.967
Adap2	3.07573	2.1083	3.42784	3.24162	3.29661	8.73623	0.646801	1.95911	4.02013	0.045	0.967
Cbs	215.935	176.657	213.592	170.725	148.925	166.967	-0.331167	7.51028	4.01991	0.045	0.967
S100a11	46.1963	39.0611	31.4991	82.9741	52.5928	32.5524	0.454372	5.59635	4.02143	0.0449	0.967
Egfl8	0.738779	0.153331	0.509544	1.27011	0.560764	1.41375	1.15159	-0.311214	4.01688	0.045	0.968
Gm10086	0.663394	0.498326	0	1.40281	0.968592	0	1.04965	-0.476028	4.0053	0.0454	0.97
Iqgap1	56.4789	41.4185	66.704	63.6381	48.0897	121.039	0.398847	6.0234	4.0059	0.0453	0.97
Mndal	4.59852	14.5473	6.99465	12.4926	28.3271	8.84498	0.819148	3.6934	4.00564	0.0453	0.97
Rasal1	7.84011	6.20991	6.62407	3.69659	4.741	6.08999	-0.554957	2.55822	3.9909	0.0457	0.977
Mrc1	0.844319	0.287496	1.06541	1.04263	0.628735	4.02374	0.987974	0.312498	3.97912	0.0461	0.983
Slc35f1	39.8036	32.3145	56.4668	25.6486	31.5897	45.0949	-0.348131	5.252	3.97528	0.0462	0.984
Gh	14.3685	22.5588	3.61313	4.49277	9.32907	5.58249	-0.807723	3.36356	3.96823	0.0464	0.986
Notch4	6.54347	6.51657	5.23441	8.77702	7.81671	9.75123	0.504787	2.90593	3.96601	0.0464	0.986
Cbr2	1.14586	0.364161	0.509544	2.44543	0.424821	2.06625	1.25393	0.268023	3.95766	0.0467	0.987
Gm13110	1.46248	0.958319	0.8338	0.777231	0.492792	0.543749	-0.85159	-0.127288	3.94329	0.0471	0.987
Htr7	1.71879	0.919986	1.99185	0.417051	1.12153	0.869998	-0.923333	0.255462	3.9521	0.0468	0.987
Mal	17.7005	9.1232	10.0519	17.6488	15.9223	19.7562	0.522049	3.91406	3.94764	0.0469	0.987
Naprt1	54.3681	55.7358	48.592	47.866	37.4182	40.7449	-0.346265	5.577	3.95992	0.0466	0.987
Ncf2	1.35694	0.613324	0.972766	1.63029	1.1895	3.11749	0.861226	0.56753	3.94556	0.047	0.987
Nipbl	50.6139	47.2643	40.0687	60.1311	51.8622	64.7424	0.342026	5.71419	3.95291	0.0468	0.987
Ptplad2	19.0726	15.5439	13.1092	14.8811	9.2611	10.15	-0.483032	3.79153	3.94594	0.047	0.987
Slc20a2	126.135	113.695	183.065	87.0119	103.316	157.941	-0.311748	6.99086	3.95189	0.0468	0.987
Bmx	2.03541	0.402494	1.01909	3.99989	0.526778	5.29249	1.36539	1.13455	3.92973	0.0474	0.991
Hspb7	0.437237	0.536659	0.231611	2.02838	0.220907	0.761249	1.34288	-0.361059	3.93047	0.0474	0.991
Kif17	18.5449	13.1481	14.1283	7.86709	10.1277	15.9862	-0.50907	3.72769	3.92811	0.0475	0.991
Lgi4	18.2886	10.254	34.51	10.559	9.12516	28.275	-0.467037	4.17076	3.92773	0.0475	0.991
St8sia5	9.61921	8.27988	9.5887	7.05195	5.48869	7.14124	-0.498716	2.98226	3.92305	0.0476	0.992
Col1a2	106.671	46.0951	125.116	95.5425	98.9493	218.297	0.486889	6.81495	3.91888	0.0477	0.993
Vnn1	17.987	16.8281	16.1664	13.3456	14.6138	10.875	-0.41405	3.91862	3.91112	0.048	0.996
Plxnb1	104.047	87.4754	179.406	92.5852	78.5069	104.001	-0.384056	6.74153	3.90774	0.0481	0.997
0610007C21Rik	219.583	250.294	162.73	255.993	224.815	163.995	0.00861485	7.75063	0.00278195	0.958	1
0610007L01Rik	51.6392	51.7301	66.1481	47.2594	53.6804	71.3761	-0.00502509	5.82293	0.000991023	0.975	1
0610007N19Rik	2.80435	2.77913	2.26979	3.67763	1.97117	3.66124	0.215202	1.5413	0.373744	0.541	1
0610007P08Rik	17.4744	12.7073	21.3082	13.6679	13.5263	23.9975	-0.0601271	4.08052	0.0831547	0.773	1
0610007P14Rik	134.292	142.464	95.7943	168.943	133.513	92.3648	0.0527653	7.0184	0.0942628	0.759	1
0610007P22Rik	51.4733	65.2999	40.9488	52.2261	55.3287	43.6449	-0.0685431	5.70009	0.159398	0.69	1
0610009B22Rik	94.3074	102.31	55.2624	102.746	99.5441	60.7186	0.0549168	6.44456	0.122141	0.727	1
0610009D07Rik	232.037	262.867	127.293	277.092	273.925	135.539	0.115623	7.79405	0.524133	0.469	1
0610009E02Rik	1.41725	2.12747	0.648511	1.0995	1.07055	1.015	-0.351175	0.404229	0.714575	0.398	1
0610009L18Rik	7.70441	8.35654	5.74395	7.88605	6.33833	5.47374	-0.155815	2.81915	0.367121	0.545	1
0610009O20Rik	16.3888	17.8822	43.8671	17.0991	18.1484	37.9174	-0.0614502	4.6249	0.107762	0.743	1
0610010F05Rik	39.5322	37.3169	43.8671	31.7148	57.1129	55.2449	0.2284	5.45694	1.20804	0.272	1
0610010K14Rik	0.784011	1.28415	3.42784	0.796188	0.713699	3.55249	-0.293457	0.712608	0.616936	0.432	1
0610010O12Rik	72.8527	78.3905	55.0308	88.1683	68.3112	63.9086	0.0883101	6.16532	0.26497	0.607	1
0610011F06Rik	84.643	100.681	56.791	101.533	80.5801	61.3349	0.00318915	6.35816	0.000339454	0.985	1
0610011L14Rik	66.5806	61.0833	76.8948	56.9085	62.2108	81.1636	-0.0586771	6.06881	0.139109	0.709	1
0610012G03Rik	67.0781	85.4629	44.423	83.7324	72.3555	45.6024	0.017526	6.07732	0.0100094	0.92	1
0610030E20Rik	15.5747	18.6872	12.507	20.5871	17.3157	14.7175	0.158725	4.06962	0.578588	0.447	1
0610031J06Rik	128.065	130.772	123.495	118.329	123.198	137.75	-0.0325254	6.98813	0.0448417	0.832	1
0610037L13Rik	107.666	124.773	81.7124	115.466	122.213	94.3586	0.071353	6.76353	0.202562	0.653	1
0610037P05Rik	117.436	152.411	84.3527	134.973	160.293	101.717	0.155781	6.98464	0.839195	0.36	1
0610040B10Rik	3.93513	4.42743	2.03818	4.53069	6.03246	2.175	0.255031	2.01234	0.721401	0.396	1
0610040J01Rik	13.3282	14.0873	13.804	14.0091	10.4506	11.9625	-0.192565	3.70396	0.725716	0.394	1
0910001L09Rik	67.3043	84.2937	46.7854	87.4479	69.8066	52.1274	0.0700515	6.10695	0.154677	0.694	1
1010001B22Rik	0	1.72497	1.99185	3.79137	1.97117	1.48625	1.03457	0.917667	1.0878	0.297	1
1110001A16Rik	29.8527	34.2503	28.3492	35.7337	31.0289	34.4374	0.114566	5.01866	0.413944	0.52	1
1110001J03Rik	86.4372	103.978	47.3876	127.636	80.716	52.0187	0.116767	6.40421	0.338949	0.56	1
1110002B05Rik	133.81	140.988	96.7671	138.12	155.909	118.066	0.141499	7.04054	0.831762	0.362	1
1110002E22Rik	1.88464	0.90082	1.34334	0.625576	0.815656	1.63125	-0.575495	0.291084	1.69578	0.193	1
1110002J07Rik	0.799088	0.613324	0.555866	0.796188	1.13852	0.18125	-0.0175928	-0.374332	0.00134159	0.971	1
1110002L01Rik	3.63359	4.79159	3.52049	4.20842	5.2168	3.58874	0.104418	2.09052	0.125356	0.723	1
1110002N22Rik	22.1935	22.9613	17.0929	23.7529	24.4527	16.095	0.0205429	4.41865	0.0117174	0.914	1
1110003E01Rik	145.359	165.866	135.029	152.849	175.621	157.397	0.105856	7.28453	0.44338	0.505	1
1110004E09Rik	58.8008	74.0972	42.9407	75.3535	67.4956	52.9974	0.151944	5.96984	0.777661	0.378	1
1110004F10Rik	260.88	346.317	212.202	303.708	350.46	221.958	0.0727493	8.15822	0.176543	0.674	1
1110005A03Rik	44.9751	47.2068	28.5808	46.4064	50.7916	31.1024	0.0739734	5.39556	0.202524	0.653	1
1110007C09Rik	12.4839	15.4864	9.63502	17.4782	13.5773	15.2612	0.299585	3.82093	1.69386	0.193	1
1110008F13Rik	31.6469	38.7928	33.7689	34.2929	33.136	36.1412	-0.0281146	5.11816	0.0255917	0.873	1
1110008J03Rik	12.122	15.8506	11.1173	14.4262	15.0047	14.065	0.140979	3.79607	0.414058	0.52	1
1110008L16Rik	11.5792	10.1773	11.4416	8.20832	13.0165	15.5512	0.100668	3.53767	0.169626	0.68	1
1110008P14Rik	43.2412	50.7909	29.8315	58.9748	50.7746	31.3924	0.158508	5.48865	0.798099	0.372	1
1110012J17Rik	6.16654	5.42409	10.2835	5.19418	5.59065	11.9625	-0.0149622	2.86558	0.00365845	0.952	1
1110012L19Rik	43.9197	50.8292	30.2484	48.9276	47.6819	31.0662	0.0144813	5.41679	0.00736174	0.932	1
1110014N23Rik	48.2619	53.0909	67.3988	37.8189	45.9317	64.6699	-0.223295	5.71308	1.80262	0.179	1
1110018G07Rik	29.9583	21.2172	56.4668	18.0469	28.9728	51.5112	-0.144835	5.07185	0.470893	0.493	1
1110018J18Rik	33.3205	24.7055	32.4719	29.6296	30.2982	42.9924	0.148523	5.00204	0.661381	0.416	1
1110018N20Rik	2.00526	2.2808	2.77933	2.19899	1.9032	2.3925	-0.125015	1.19266	0.147491	0.701	1
1110019D14Rik	4.6136	4.04411	2.22347	3.65867	3.19465	2.465	-0.206088	1.80584	0.466928	0.494	1
1110020A21Rik	3.1662	3.21995	1.48231	3.71554	3.05871	2.3925	0.247008	1.5686	0.603934	0.437	1
1110020G09Rik	100.745	75.3047	139.106	56.2071	79.2036	118.465	-0.348238	6.54956	3.71595	0.0539	1
1110021J02Rik	3.19635	2.68329	7.13362	2.04734	2.80382	7.39499	-0.18574	2.02033	0.402641	0.526	1
1110021L09Rik	24.3345	18.1506	29.8778	18.2934	22.5665	29.0724	-0.0678649	4.55694	0.120748	0.728	1
1110028C15Rik	14.3082	12.2856	17.8804	12.0755	12.5917	22.185	0.0124915	3.91163	0.00363359	0.952	1
1110031I02Rik	44.2664	49.8709	37.6599	52.3778	39.8652	34.7999	-0.072328	5.44649	0.156044	0.693	1
1110032A03Rik	54.338	54.375	28.4882	53.4394	58.2855	31.0299	0.0496404	5.56825	0.0942272	0.759	1
1110032F04Rik	1.83941	1.24581	1.80657	1.17532	1.58033	2.06625	-0.0679081	0.715128	0.0357709	0.85	1
1110034A24Rik	36.2303	43.3735	32.8424	42.4444	39.3554	37.5549	0.072346	5.28158	0.176142	0.675	1
1110034B05Rik	23.0228	19.6264	12.9239	19.6014	19.2529	16.7475	0.0124702	4.22876	0.00390753	0.95	1
1110034G24Rik	13.9463	16.6173	12.6923	17.118	16.9419	13.1587	0.106576	3.9323	0.257739	0.612	1
1110035M17Rik	1.74895	1.43748	0.555866	1.70612	1.34243	0.543749	-0.0585111	0.430622	0.0235534	0.878	1
1110037F02Rik	34.4814	25.8746	37.4283	36.5109	33.5269	37.1199	0.125525	5.09372	0.45329	0.501	1
1110038B12Rik	4.88499	6.99573	4.40061	6.29367	6.47427	6.56124	0.235428	2.59014	0.71184	0.399	1
1110038D17Rik	12.6045	12.3048	13.1555	10.8812	13.1355	19.8287	0.139077	3.76095	0.393674	0.53	1
1110038F14Rik	47.0256	69.0756	34.649	62.4628	59.1351	35.9599	0.043817	5.70674	0.0535631	0.817	1
1110049F12Rik	104.816	128.396	92.6907	105.798	113.206	97.8023	-0.0543132	6.75213	0.111742	0.738	1
1110051M20Rik	180.368	187.85	146.749	175.389	169.877	131.334	-0.132494	7.38091	0.715635	0.398	1
1110054M08Rik	7.84011	8.39487	6.43879	9.21303	6.95007	4.82124	-0.147293	2.89591	0.301526	0.583	1
1110054O05Rik	42.6833	45.7501	41.0878	41.6292	53.9013	48.3212	0.132211	5.51328	0.598224	0.439	1
1110057K04Rik	68.7517	61.3899	68.3716	66.8039	66.8668	60.1749	-0.051092	6.03646	0.0956754	0.757	1
1110058L19Rik	77.21	108.808	44.9789	92.6421	91.9653	49.9162	0.0227489	6.30358	0.0163038	0.898	1
1110059E24Rik	67.3797	69.9765	46.1369	64.9082	83.146	48.7924	0.0802848	6.00302	0.231145	0.631	1
1110059G10Rik	42.7587	49.5643	22.7442	53.7806	58.1325	23.925	0.19517	5.41677	1.25529	0.263	1
1110065P20Rik	13.6599	19.4155	18.8068	15.6394	13.6792	19.5025	-0.117573	4.06738	0.287105	0.592	1
1110067D22Rik	37.9793	31.3562	55.494	32.1887	37.1464	59.4136	0.0151395	5.38286	0.00808033	0.928	1
1190002H23Rik	66.7464	53.6275	40.7172	65.5338	40.6299	41.7599	-0.121746	5.70226	0.35165	0.553	1
1190002N15Rik	29.2044	33.1195	51.5566	31.1461	43.0259	53.8312	0.168181	5.31893	0.823861	0.364	1
1190003J15Rik	1.40217	1.85914	0.972766	2.0663	0.951599	1.70375	0.151166	0.643093	0.127609	0.721	1
1190005F20Rik	51.2622	35.6111	39.6055	37.5535	34.2746	46.2912	-0.124571	5.34752	0.431884	0.511	1
1190005I06Rik	15.2128	21.5047	13.2481	15.1655	14.6138	10.73	-0.320009	3.93685	2.07621	0.15	1
1190007F08Rik	9.86044	7.87738	10.7004	8.8718	6.96707	15.2612	0.042968	3.2954	0.0292339	0.864	1
1190007I07Rik	13.886	17.7481	11.21	20.6819	16.636	12.0712	0.181373	3.96778	0.666159	0.414	1
1200011I18Rik	26.2644	22.9997	28.8587	19.1464	22.8724	27.0425	-0.202542	4.61234	1.23094	0.267	1
1200011M11Rik	17.5045	17.2881	23.7633	16.9853	19.1	25.7737	0.0560911	4.31725	0.0889241	0.766	1
1200014J11Rik	32.3857	31.567	28.9051	28.7196	32.9321	34.2199	0.0260553	4.97789	0.0229291	0.88	1
1200016B10Rik	28.0887	27.3121	20.6597	42.2359	28.48	24.0337	0.295557	4.85161	2.10382	0.147	1
1300001I01Rik	44.6886	31.9504	64.2489	29.7623	28.2421	58.7611	-0.326535	5.40241	3.31255	0.0688	1
1300002E11Rik	13.0869	16.6364	9.91295	16.2839	20.0516	10.3675	0.200972	3.87488	0.809483	0.368	1
1300010F03Rik	31.4961	22.8655	37.4747	19.3929	22.0737	31.8274	-0.35598	4.77099	3.57896	0.0585	1
1300017J02Rik	2.08064	7.01489	2.03818	3.8672	10.0428	3.40749	0.625065	2.30003	1.90988	0.167	1
1300018I17Rik	23.1585	24.9738	23.6706	18.2934	24.4527	31.9362	0.00666504	4.60295	0.00110854	0.973	1
1300018J18Rik	23.0379	25.1271	32.1476	22.3691	22.2266	33.4949	-0.0725715	4.71253	0.168369	0.682	1
1500001M20Rik	37.542	48.7209	26.9595	44.3969	43.5017	27.2237	0.00527021	5.27246	0.00086676	0.977	1
1500002O10Rik	0.919705	0.843321	0.694833	1.15637	0.781671	0.434999	-0.0751584	-0.177285	0.0307502	0.861	1
1500002O20Rik	31.285	31.5095	34.9269	27.1652	28.9728	87.6886	0.307775	5.29388	1.5479	0.213	1
1500003O03Rik	66.3092	59.3391	82.0366	65.458	89.3654	90.1173	0.227292	6.23125	1.70442	0.192	1
1500009C09Rik	12.5592	17.9206	36.5019	18.1417	18.913	23.2725	-0.0433442	4.39305	0.0294834	0.864	1
1500009L16Rik	16.8713	18.2081	11.3489	20.4165	17.5026	14.3912	0.170508	4.06195	0.700786	0.403	1
1500010J02Rik	62.0273	51.1934	78.1919	51.8659	59.254	72.5724	-0.0709047	5.95781	0.182717	0.669	1
1500011B03Rik	39.4568	56.1383	37.7989	47.2405	49.1263	41.2887	0.0302034	5.50929	0.0267956	0.87	1
1500011H22Rik	76.7426	86.6704	71.0583	79.8273	77.1305	77.5386	-0.0152076	6.29433	0.00908994	0.924	1
1500011K16Rik	42.804	48.1076	25.9404	56.7568	43.0429	27.7675	0.108004	5.37427	0.346629	0.556	1
1500012F01Rik	11.1722	15.3331	7.0873	12.8907	15.2256	8.59124	0.127592	3.58209	0.297859	0.585	1
1500015O10Rik	182.976	159.943	137.577	247.747	140.667	173.021	0.217638	7.44986	1.08225	0.298	1
1500026H17Rik	3.0305	4.69576	1.48231	3.84824	3.99332	1.74	0.0679278	1.72276	0.0439292	0.834	1
1500031L02Rik	59.3134	64.3032	48.1288	55.7142	63.5023	52.9249	-0.00872952	5.85026	0.00291039	0.957	1
1500032L24Rik	172.256	220.778	103.252	251.216	178.544	111.505	0.106649	7.46022	0.317092	0.573	1
1520402A15Rik	7.34256	5.78825	10.5151	7.37421	6.42329	10.4037	0.0278951	2.98309	0.0124459	0.911	1
1600002H07Rik	10.4484	12.6881	12.368	10.9381	14.5119	13.9925	0.131447	3.64657	0.335894	0.562	1
1600002K03Rik	3.70897	4.04411	2.36243	5.21313	4.2652	2.64625	0.241843	1.94551	0.661886	0.416	1
1600012F09Rik	22.5554	24.418	22.281	26.0088	26.7807	21.7862	0.0866883	4.59472	0.217506	0.641	1
1600012H06Rik	22.7363	24.0538	29.4609	22.6534	24.8605	30.4137	0.0121111	4.67842	0.00463864	0.946	1
1600014C10Rik	21.4397	18.1122	21.9567	17.9521	18.4542	25.7375	-0.0219158	4.35921	0.0132195	0.908	1
1600020E01Rik	17.5799	21.0064	9.86663	14.8243	18.6751	13.63	-0.0100556	4.01558	0.00205097	0.964	1
1600021P15Rik	14.278	15.1414	24.9677	13.175	18.2333	23.5625	0.0161054	4.17289	0.00594563	0.939	1
1600027N09Rik	29.7622	37.5853	27.9786	30.1224	37.4352	34.5462	0.0825216	5.04639	0.198047	0.656	1
1600029O15Rik	0.376928	1.05415	0.648511	0.758274	1.64831	0.942498	0.671629	-0.0477194	1.75987	0.185	1
1700001G11Rik	1.70372	2.0508	0.8338	2.04734	1.35943	0.797499	-0.125784	0.662395	0.112108	0.738	1
1700001L05Rik	0.964936	0.68999	1.01909	0.530792	0.339857	0.978748	-0.665891	-0.3739	2.27667	0.131	1
1700001L19Rik	1.76402	1.53331	1.11173	1.47863	1.32544	0.724999	-0.3424	0.502994	0.871949	0.35	1
1700001O22Rik	1.83941	1.74414	1.15805	1.49759	1.78425	2.3925	0.20673	0.838063	0.318692	0.572	1
1700003E16Rik	8.85027	10.8098	7.96742	6.69177	7.32392	9.56998	-0.264471	3.10061	1.0656	0.302	1
1700003F12Rik	1.17602	2.14663	1.57495	1.42176	0.968592	1.05125	-0.518561	0.531409	1.64542	0.2	1
1700007K13Rik	1.13078	1.66748	1.11173	1.13741	1.12153	2.57375	0.144917	0.557374	0.121621	0.727	1
1700007L15Rik	2.00526	1.28415	1.01909	2.27482	1.41041	1.16	0.162259	0.69983	0.176297	0.675	1
1700008O03Rik	2.33695	3.02829	1.11173	2.27482	1.92019	1.45	-0.160975	1.09696	0.212136	0.645	1
1700009P17Rik	2.66865	2.5108	2.54772	3.88615	2.29403	4.16874	0.385619	1.60661	1.33053	0.249	1
1700010I14Rik	2.38219	1.9933	2.13082	2.12317	2.26005	2.2475	0.0112951	1.16624	0.00123312	0.972	1
1700011J10Rik	26.6111	31.4329	18.5752	32.2835	22.6175	19.14	-0.0549977	4.67255	0.0720912	0.788	1
1700012A16Rik	1.31171	0.90082	1.2507	0.909929	1.00258	0.869998	-0.313826	0.1237	0.651461	0.42	1
1700012B15Rik	4.79453	8.12655	3.01094	6.91925	8.63236	3.69749	0.258969	2.60296	0.755019	0.385	1
1700013F07Rik	1.0554	0.977485	0.648511	0.872015	0.764678	1.12375	-0.0128589	-0.0552469	0.00099938	0.975	1
1700013G23Rik	4.25175	5.02159	1.99185	5.45957	3.68745	2.28375	0.0331389	1.98441	0.0113638	0.915	1
1700016K19Rik	0.286465	0.613324	0.4169	0.947842	0.373843	1.74	1.00135	-0.443203	3.25397	0.0713	1
1700017B05Rik	35.9439	41.5144	39.6981	43.2595	36.0758	32.9149	-0.0813426	5.26694	0.19186	0.661	1
1700019D03Rik	69.3548	69.4781	51.5566	83.7893	61.1063	47.3424	-0.0133622	6.01337	0.00535379	0.942	1
1700019E19Rik	54.6395	76.4739	39.5128	81.4386	63.3833	37.7724	0.0584118	5.90584	0.087124	0.768	1
1700020I14Rik	65.4649	49.8518	63.3688	56.6241	63.1454	73.4061	0.0901101	5.94914	0.287258	0.592	1
1700020O03Rik	20.0677	15.0456	32.1013	11.848	20.0006	34.5824	-0.0781076	4.44847	0.120739	0.728	1
1700021C14Rik	3.85974	5.11742	3.14991	5.34583	3.75542	4.38624	0.148277	2.12536	0.233932	0.629	1
1700021F05Rik	50.7496	60.5658	31.3601	60.8325	55.5666	39.0774	0.129573	5.65569	0.577923	0.447	1
1700021K19Rik	38.8839	32.0462	65.1753	25.6486	31.3688	63.6549	-0.23961	5.39245	1.9368	0.164	1
1700022I11Rik	0	0.0191664	1.89921	0.0568705	0	1.0875	-0.229611	-1.37682	0.0734056	0.786	1
1700023F06Rik	2.51788	2.77913	1.99185	2.99518	2.65088	2.5375	0.156257	1.41155	0.244999	0.621	1
1700024N20Rik	0.753856	1.09248	0.277933	0.644533	0.730692	0.579999	-0.0807171	-0.389626	0.0307616	0.861	1
1700025G04Rik	35.5519	42.4344	29.0903	45.9514	37.6561	28.6375	0.0445424	5.21081	0.0587968	0.808	1
1700025K23Rik	35.8685	40.3069	21.6325	37.7241	34.8693	20.3	-0.0923564	5.01609	0.275969	0.599	1
1700028J19Rik	0.934782	0.709156	0.509544	1.00471	1.4274	0.869998	0.606258	-0.015073	2.25669	0.133	1
1700028P14Rik	1.11571	0.881653	0.463222	1.30802	0.849642	1.26875	0.462979	0.0701575	1.14279	0.285	1
1700029F09Rik	54.5038	52.8992	36.8725	54.4251	56.909	42.0137	0.0794459	5.6472	0.246978	0.619	1
1700029G01Rik	3.60343	3.60328	2.9183	2.57813	3.43255	3.26249	-0.147412	1.72141	0.234753	0.628	1
1700029J07Rik	10.3429	9.69819	7.55052	8.18936	7.90167	8.80873	-0.160916	3.14333	0.448968	0.503	1
1700030J22Rik	2.17111	1.72497	2.0845	2.54022	2.19208	3.26249	0.379472	1.23688	1.35928	0.244	1
1700030K09Rik	23.9274	23.5363	24.6897	18.8052	26.152	23.7437	-0.0900846	4.55563	0.21684	0.641	1
1700034H14Rik	53.4333	54.2217	37.4747	50.7854	49.5681	43.4274	-0.0157189	5.60161	0.00932182	0.923	1
1700037C18Rik	9.01612	10.9248	5.65131	9.04242	7.62979	8.44624	-0.010021	3.10182	0.00143302	0.97	1
1700037H04Rik	62.4947	85.6737	57.5322	69.7233	74.5136	59.3049	-0.0312339	6.10401	0.0314634	0.859	1
1700040D17Rik	1.40217	2.01247	1.38967	1.99047	2.1411	1.305	0.158808	0.842653	0.196621	0.657	1
1700040I03Rik	32.6118	35.6495	21.5861	38.8995	30.944	25.375	0.0825659	4.96667	0.203097	0.652	1
1700040L02Rik	1.37202	0.594158	0.8338	0.66349	0.577757	3.08124	0.120517	0.215689	0.0464021	0.829	1
1700045I19Rik	0.980013	0.843321	1.29702	1.28907	0.594749	0.471249	-0.39391	-0.0555372	0.640297	0.424	1
1700048O20Rik	8.54873	8.47154	5.60499	8.98555	9.10816	4.20499	-0.0782861	2.94479	0.0922509	0.761	1
1700049G17Rik	6.49824	5.55825	6.39246	4.51173	5.26778	9.46123	-0.0382572	2.6402	0.0189687	0.89	1
1700052N19Rik	20.4144	17.6139	15.7495	17.8953	17.3327	19.2487	0.00312048	4.18	0.000250157	0.987	1
1700054N08Rik	39.5322	40.8052	38.957	30.9565	40.5449	40.2374	-0.116882	5.26811	0.45527	0.5	1
1700055D18Rik	0.904628	1.13082	0.602189	0.947842	1.00258	0.906248	0.103202	-0.0198228	0.068038	0.794	1
1700056E22Rik	2.06557	1.47581	0.926444	1.40281	0.934606	0.398749	-0.752913	0.390547	3.40617	0.065	1
1700056N10Rik	0.980013	1.05415	0.509544	0.436008	0.832649	0.724999	-0.367865	-0.27612	0.660389	0.416	1
1700066M21Rik	23.3394	15.4673	28.4418	14.8243	22.1757	30.3774	-0.0327576	4.47103	0.0219558	0.882	1
1700067K01Rik	1.01017	1.64831	0.509544	1.74403	1.07055	0.507499	0.058816	0.257554	0.0187258	0.891	1
1700071M16Rik	0.588008	0.670823	1.29702	0.644533	0.373843	1.16	-0.273697	-0.362876	0.411989	0.521	1
1700081L11Rik	43.9197	42.0894	69.8076	39.6767	55.6516	78.4811	0.13542	5.76138	0.601752	0.438	1
1700084C01Rik	3.06066	3.06662	5.92924	2.55917	2.15809	4.89374	-0.360445	1.8233	1.50308	0.22	1
1700084C06Rik	0.949859	1.03498	0.370578	1.34594	0.951599	1.12375	0.554941	0.0593247	1.6844	0.194	1
1700086L19Rik	5.57854	6.07574	1.43599	8.92868	6.35532	2.175	0.439772	2.42319	2.26094	0.133	1
1700086O06Rik	7.84011	10.4648	6.11453	9.95235	9.53298	6.99624	0.106951	3.11372	0.185441	0.667	1
1700088E04Rik	2.29172	3.54578	2.17714	2.74874	2.39599	2.21125	-0.133884	1.40375	0.159011	0.69	1
1700095B22Rik	0.859396	0.824154	1.01909	0.66349	0.594749	0.507499	-0.592142	-0.341796	2.03496	0.154	1
1700101I11Rik	0.663394	1.11165	0.741155	0.492878	1.24048	0.362499	-0.312926	-0.24602	0.384054	0.535	1
1700106N22Rik	14.1122	15.1989	10.0982	14.6157	14.0021	9.56998	-0.0630824	3.71815	0.0872074	0.768	1
1700113A16Rik	4.02559	4.6191	3.61313	5.15626	4.82597	3.91499	0.165439	2.15692	0.34401	0.558	1
1700123M08Rik	2.00526	2.70246	1.11173	2.78666	2.1411	1.45	0.144324	1.1069	0.172033	0.678	1
1700123O20Rik	55.7552	72.4106	45.1641	62.8799	70.2824	51.9824	0.0841324	5.91481	0.237357	0.626	1
1810006K21Rik	95.2724	128.894	68.4642	154.081	120.768	74.6386	0.221063	6.7661	1.37494	0.241	1
1810008A18Rik	28.0284	32.5445	34.4174	26.0467	28.7859	35.8874	-0.0952527	4.94807	0.294124	0.588	1
1810009A15Rik	82.1251	96.6177	49.75	111.485	82.8571	51.1487	0.0786847	6.32964	0.188231	0.664	1
1810010H24Rik	7.26718	8.8357	8.61593	7.99979	10.6715	8.37374	0.113491	3.12133	0.200403	0.654	1
1810011O10Rik	2.59327	1.22665	1.62128	3.29849	1.41041	2.42875	0.38103	1.11231	0.79781	0.372	1
1810012P15Rik	22.9625	25.338	25.4309	22.407	22.1417	27.1875	-0.0643517	4.59943	0.126152	0.722	1
1810013D10Rik	87.8544	95.5827	62.9055	89.6659	99.3062	61.9149	0.00305992	6.38999	0.00036686	0.985	1
1810013L24Rik	45.6234	34.4612	55.0308	36.7194	41.7344	53.8674	-0.0467331	5.46826	0.0720276	0.788	1
1810014B01Rik	9.83029	8.43321	7.22626	7.31734	8.34349	6.01749	-0.250017	2.99826	1.04833	0.306	1
1810014F10Rik	29.5512	26.9288	15.6106	31.9612	21.8358	17.4	-0.0101883	4.60298	0.00246068	0.96	1
1810020D17Rik	90.9452	99.991	49.0089	117.134	80.2232	47.5599	0.00338699	6.36474	0.000325904	0.986	1
1810021B22Rik	2.45757	3.14329	1.99185	3.14684	2.6169	1.84875	-0.0135804	1.40035	0.00172672	0.967	1
1810022K09Rik	36.2454	45.4435	15.6569	54.1218	43.9265	16.675	0.194037	5.18251	1.03231	0.31	1
1810024B03Rik	3.95021	4.58076	3.01094	4.60651	4.06129	2.2475	-0.120758	1.9562	0.159372	0.69	1
1810026J23Rik	99.5241	96.0044	128.683	83.5997	106.664	138.982	-0.00867155	6.75564	0.00292091	0.957	1
1810027O10Rik	106.972	133.206	74.1155	161.285	105.882	81.0549	0.130141	6.80927	0.436517	0.509	1
1810029B16Rik	11.9411	13.3015	9.95927	12.2272	13.9171	10.5125	0.0425198	3.60069	0.0378769	0.846	1
1810030N24Rik	57.0518	59.4349	31.2675	69.5148	58.8972	33.3499	0.110031	5.71531	0.423518	0.515	1
1810030O07Rik	55.5441	47.2643	54.058	45.0225	55.7025	53.6137	-0.041521	5.69717	0.0608623	0.805	1
1810031K17Rik	65.872	84.7346	77.1728	65.2495	83.5198	77.5749	-0.0302065	6.24398	0.0293883	0.864	1
1810032O08Rik	2.08064	3.52661	2.64037	1.95256	3.16067	3.62499	0.0342759	1.51616	0.0092003	0.924	1
1810035L17Rik	61.2734	66.9673	38.5864	80.0358	61.5991	43.1012	0.133431	5.8951	0.57723	0.447	1
1810037I17Rik	153.289	167.993	102.233	216.355	142.417	105.777	0.108166	7.23153	0.319674	0.572	1
1810041L15Rik	51.6844	47.9734	72.6332	39.4113	46.6793	66.4824	-0.201736	5.74583	1.54457	0.214	1
1810043G02Rik	35.8986	43.1819	33.4909	37.6862	32.9151	37.1199	-0.0785766	5.20502	0.194619	0.659	1
1810043H04Rik	22.3443	29.0754	14.2672	32.3214	21.6829	14.9712	0.0559715	4.51841	0.0641115	0.8	1
1810046J19Rik	44.1458	61.3899	51.4176	62.368	57.1299	58.1449	0.160179	5.80725	0.769627	0.38	1
1810048J11Rik	29.8226	24.5521	36.4092	26.5396	29.8734	37.0474	0.0269616	4.93272	0.0232501	0.879	1
1810049H13Rik	9.13674	7.91571	6.80936	10.7675	8.19055	5.65499	0.0090674	3.04537	0.00118955	0.972	1
1810055G02Rik	35.5519	39.0419	43.0796	37.762	38.4208	44.2612	0.0156051	5.3092	0.00882457	0.925	1
1810058I24Rik	60.218	74.2122	39.0496	66.9366	65.2525	39.2949	-0.0310934	5.86793	0.0338933	0.854	1
1810059H22Rik	2.81942	2.43413	1.6676	2.84353	1.98816	1.70375	-0.0863524	1.23013	0.0660083	0.797	1
1810062O18Rik	1.53787	2.41496	2.9183	1.78194	2.12411	2.50125	-0.0987336	1.15188	0.0813682	0.775	1
1810063B05Rik	32.1444	29.4779	18.7142	39.089	29.9244	18.415	0.0905045	4.83243	0.220262	0.639	1
1810063B07Rik	21.9825	26.2388	13.6187	30.8617	26.4409	17.0375	0.257205	4.53145	1.76552	0.184	1
1810074P20Rik	42.7587	33.1003	44.2377	36.3024	34.9883	43.6449	-0.0819516	5.28825	0.225661	0.635	1
2010001A14Rik	6.86009	8.39487	5.09544	6.38846	7.12	5.61874	-0.0932853	2.74614	0.129085	0.719	1
2010001M06Rik	1.10063	1.13082	1.01909	1.38385	1.1895	1.05125	0.15004	0.274495	0.162512	0.687	1
2010002N04Rik	21.5301	16.1189	15.24	16.1891	17.6556	12.76	-0.201425	4.06802	0.931448	0.334	1
2010003O02Rik	10.0263	12.5348	9.21812	15.4877	8.63236	9.27998	0.0554827	3.46445	0.0412609	0.839	1
2010011I20Rik	99.2377	119.847	105.893	113.836	109.349	103.312	-0.0121	6.76894	0.00543222	0.941	1
2010012O05Rik	28.7219	39.5211	20.3354	38.8995	37.8601	23.4537	0.163593	4.99974	0.745358	0.388	1
2010012P19Rik	1.94495	0.824154	1.01909	1.59238	1.46138	1.9575	0.367845	0.606193	0.781689	0.377	1
2010015L04Rik	7.9758	6.17157	4.86383	6.95716	7.15399	9.20748	0.273231	2.82875	0.984101	0.321	1
2010015M23Rik	2.14095	1.85914	1.06541	2.31274	2.49795	1.34125	0.274416	0.989587	0.672761	0.412	1
2010106G01Rik	51.9256	39.1186	48.5457	57.5909	58.6933	43.6812	0.172065	5.65115	0.804229	0.37	1
2010107E04Rik	102.916	130.446	50.6765	179.237	130.964	62.1686	0.356663	6.80656	3.59718	0.0579	1
2010107G23Rik	40.1805	56.0233	38.7717	45.7239	61.3951	42.7749	0.12943	5.58103	0.449558	0.503	1
2010107H07Rik	23.7766	27.6571	11.9048	34.2361	26.8827	14.4637	0.244902	4.56725	1.53118	0.216	1
2010109K11Rik	18.7258	14.279	25.8478	12.5305	18.93	25.2662	-0.0759499	4.25121	0.12236	0.726	1
2010111I01Rik	15.1374	17.2497	15.2863	16.0565	16.3471	22.2937	0.159701	4.09059	0.601265	0.438	1
2010204K13Rik	28.4656	32.947	19.1311	40.3781	25.5063	17.545	0.014893	4.80088	0.00461712	0.946	1
2010300C02Rik	105.6	81.4954	137.299	78.5761	69.2628	149.277	-0.201759	6.67432	1.37482	0.241	1
2010305A19Rik	33.5014	39.7702	32.0086	43.5249	39.0835	35.9962	0.155033	5.2322	0.785552	0.375	1
2010317E24Rik	31.5413	36.4545	37.1041	39.2407	29.8734	35.9962	-0.014284	5.1347	0.00579316	0.939	1
2010321M09Rik	46.3019	44.4468	49.0552	41.5913	49.5681	51.5112	0.00937697	5.55601	0.00326489	0.954	1
2200002K05Rik	2.23141	1.14998	1.11173	1.08054	1.51236	1.0875	-0.293743	0.530619	0.541886	0.462	1
2210008F06Rik	1.62833	1.89747	0.926444	1.42176	1.37642	0.688749	-0.363228	0.513897	0.993157	0.319	1
2210009G21Rik	8.44319	8.73987	7.64316	8.0377	11.81	8.59124	0.177156	3.16622	0.506542	0.477	1
2210012G02Rik	16.8412	20.623	16.9076	21.6108	20.9692	17.0012	0.110949	4.26194	0.301488	0.583	1
2210013O21Rik	40.2559	47.6285	22.6516	54.3303	43.6036	27.0062	0.172153	5.32166	0.910723	0.34	1
2210015D19Rik	26.8524	31.8737	16.9076	29.5348	32.5923	18.705	0.0844923	4.7293	0.214725	0.643	1
2210016F16Rik	85.8492	88.127	60.0799	69.837	77.9632	58.3624	-0.189861	6.2104	1.46069	0.227	1
2210016L21Rik	85.8492	112.277	74.5324	110.101	103.945	75.5811	0.0629936	6.56604	0.133009	0.715	1
2210018M11Rik	28.9029	22.8847	36.085	23.5444	31.0799	37.2287	0.0484589	4.8945	0.066473	0.797	1
2210021J22Rik	24.1686	29.9187	18.112	30.6343	24.6736	19.6475	0.0439502	4.63724	0.050149	0.823	1
2210403K04Rik	14.3082	15.8506	12.3217	14.8432	18.2503	17.2912	0.22981	3.96017	1.21099	0.271	1
2210404J11Rik	10.8254	11.289	9.49605	8.83389	11.912	9.38873	-0.0858631	3.37787	0.136029	0.712	1
2210404O07Rik	1.28156	1.55248	1.38967	1.78194	2.05613	1.5225	0.335724	0.734811	0.909135	0.34	1
2210404O09Rik	10.3429	9.79402	7.17994	9.30781	13.5943	7.64874	0.138652	3.29556	0.322343	0.57	1
2210406O10Rik	1.76402	2.68329	1.57495	1.57342	1.68229	1.3775	-0.387186	0.891157	1.1904	0.275	1
2210408F21Rik	7.59887	8.64404	4.12268	8.45475	6.8821	4.60374	-0.0222604	2.79013	0.00727045	0.932	1
2210408I21Rik	7.46318	5.19409	6.48511	4.81504	6.54224	11.5275	0.146	2.7933	0.246238	0.62	1
2210411K11Rik	10.4183	13.359	11.5805	16.5872	12.5577	11.0562	0.162746	3.67297	0.448038	0.503	1
2210416O15Rik	0.844319	0.958319	0.8338	1.13741	0.628735	0.289999	-0.415093	-0.223942	0.746209	0.388	1
2210417K05Rik	3.30189	3.33495	1.89921	4.24633	2.19208	1.92125	-0.0344283	1.55821	0.00959802	0.922	1
2300009A05Rik	22.0729	30.6087	12.8312	34.5583	27.8173	14.935	0.220253	4.60676	1.11477	0.291	1
2310001A20Rik	71.8727	64.2265	69.0201	68.6427	70.9111	67.3524	-0.0040632	6.10545	0.000647753	0.98	1
2310003C23Rik	24.5606	24.4371	25.4309	22.9757	23.807	26.7525	-0.0381043	4.62541	0.0461922	0.83	1
2310003F16Rik	8.26227	11.5382	16.7223	12.3978	10.6375	21.4237	0.246644	3.73363	1.15281	0.283	1
2310003H01Rik	34.8131	43.0669	55.7719	34.7289	36.4666	61.6611	-0.0576484	5.45759	0.11235	0.737	1
2310003L22Rik	32.1595	37.8153	20.0575	38.198	34.6654	20.3	0.0293646	4.95862	0.0264809	0.871	1
2310004I24Rik	19.5098	19.013	14.6841	18.6156	21.2071	15.9137	0.0530753	4.19833	0.0758173	0.783	1
2310004N24Rik	46.724	65.7598	34.6953	65.8371	58.3534	36.2862	0.0995474	5.70379	0.280667	0.596	1
2310008H04Rik	35.4614	27.8487	39.8834	26.1794	32.8981	38.3162	-0.103493	5.05631	0.326575	0.568	1
2310008H09Rik	46.5732	54.1259	38.0768	64.1689	57.2999	47.0524	0.265133	5.69278	2.45552	0.117	1
2310009B15Rik	10.8405	15.7548	8.61593	16.7958	15.1746	8.51874	0.160714	3.69007	0.444076	0.505	1
2310010J17Rik	1.61325	1.49498	0.8338	1.89568	1.61432	0.724999	0.0749116	0.561636	0.0416137	0.838	1
2310011J03Rik	71.164	91.2703	72.17	81.0974	68.2093	72.3186	-0.09796	6.25612	0.313512	0.576	1
2310015A10Rik	6.1967	7.57072	8.10638	7.01403	5.2168	6.92374	-0.203957	2.78042	0.576764	0.448	1
2310015B20Rik	0.708625	1.03498	0.509544	1.40281	0.713699	0.833749	0.389129	-0.08768	0.752944	0.386	1
2310016G11Rik	2.8345	2.72163	1.76024	2.40752	2.5999	1.55875	-0.168101	1.27675	0.277719	0.598	1
2310016M24Rik	160.164	195.631	100.241	198.516	154.516	107.916	0.0109795	7.27761	0.00393556	0.95	1
2310021P13Rik	31.3303	31.7587	51.464	23.2221	29.3466	48.6112	-0.222426	5.1487	1.66577	0.197	1
2310022A10Rik	30.697	32.8895	45.859	26.2931	32.7452	45.7112	-0.0924918	5.14486	0.286912	0.592	1
2310026L22Rik	0.693548	1.18832	0.277933	0.796188	1.32544	0.362499	0.214766	-0.183456	0.218375	0.64	1
2310028H24Rik	6.07608	6.17157	13.2018	6.25576	6.04945	13.8112	0.0087372	3.06995	0.00136143	0.971	1
2310030G06Rik	0.738779	0.843321	0.463222	0.701403	0.458807	1.6675	0.217192	-0.261135	0.176175	0.675	1
2310030N02Rik	24.5154	30.8962	15.6569	31.0892	25.4893	17.0375	0.0438408	4.61856	0.0494345	0.824	1
2310033P09Rik	29.717	36.9144	27.608	36.3403	28.3271	28.4562	-0.0309219	4.97718	0.0260937	0.872	1
2310035C23Rik	26.973	20.4314	33.1204	17.6109	28.2591	35.8149	-0.0137682	4.74202	0.00426515	0.948	1
2310035K24Rik	31.7072	38.5053	28.5345	34.5204	36.1438	28.8912	-0.00582033	5.05958	0.0010878	0.974	1
2310036O22Rik	102.826	154.979	84.3527	140.262	147.039	93.5973	0.133865	6.93162	0.523362	0.469	1
2310037I24Rik	37.7079	49.4301	48.1751	38.4066	53.5614	52.1274	0.0683042	5.54004	0.129769	0.719	1
2310039H08Rik	26.204	29.4012	16.1664	35.7147	23.9259	17.5812	0.0938684	4.66145	0.202312	0.653	1
2310040G07Rik	1.41725	2.31913	1.2507	3.01414	1.54635	1.12375	0.151379	0.916113	0.136257	0.712	1
2310042D19Rik	2.23141	1.32248	3.05727	1.21324	1.58033	1.16	-0.685735	0.829907	2.93586	0.0866	1
2310044G17Rik	54.6395	45.8268	75.5978	39.7904	54.2412	68.8024	-0.127616	5.80679	0.526195	0.468	1
2310044H10Rik	214.171	277.817	313.555	230.932	265.87	286.846	-0.0538067	8.04588	0.0966342	0.756	1
2310045N01Rik	22.088	24.418	15.101	25.6297	24.4527	17.2912	0.119266	4.44765	0.405715	0.524	1
2310046A06Rik	8.95581	9.21903	5.04912	7.10882	8.95523	5.50999	-0.100654	2.93417	0.162351	0.687	1
2310046O06Rik	27.0936	27.9254	26.9595	23.8856	27.5114	32.0087	-0.00340445	4.78367	0.000367095	0.985	1
2310047B19Rik	11.3078	12.554	18.3436	11.867	16.0922	21.46	0.208302	3.91825	0.943047	0.331	1
2310047M10Rik	5.65392	7.99238	10.3299	6.29367	6.47427	13.63	0.0486749	3.04621	0.035513	0.851	1
2310050B05Rik	0.964936	1.32248	0.741155	1.02367	0.934606	1.48625	0.120175	0.172849	0.0853039	0.77	1
2310057M21Rik	18.5147	17.3456	15.8422	18.028	17.3667	15.805	-0.0292845	4.11202	0.022397	0.881	1
2310058D17Rik	1.13078	0.90082	0.509544	0.815144	1.13852	0.724999	0.077214	-0.0676834	0.0363055	0.849	1
2310061C15Rik	36.6827	41.3419	22.0957	51.8849	33.6118	24.215	0.118255	5.15517	0.336307	0.562	1
2310061I04Rik	48.7142	50.5417	39.3739	44.9277	42.8899	43.7899	-0.0856053	5.50071	0.269597	0.604	1
2310067B10Rik	38.1602	29.6504	72.7259	26.7102	31.8106	59.4499	-0.256095	5.40278	2.12117	0.145	1
2310069G16Rik	10.4032	9.1807	5.46602	9.42155	9.12516	6.12624	-0.0173806	3.08437	0.00528208	0.942	1
2310079F23Rik	5.92531	4.65743	4.86383	5.47853	4.94492	6.81499	0.125109	2.45419	0.206561	0.649	1
2400001E08Rik	88.2615	116.014	68.6032	113.495	112.068	74.2036	0.114441	6.5948	0.448462	0.503	1
2400003C14Rik	141.258	134.471	136.141	118.461	133.224	147.646	-0.0673323	7.07756	0.19022	0.663	1
2400009B08Rik	3.58836	4.17827	1.38967	5.38374	3.34759	1.74	0.20447	1.78931	0.385629	0.535	1
2410001C21Rik	133.206	150.36	118.492	139.124	142.842	121.256	-0.0128268	7.07742	0.00668117	0.935	1
2410002F23Rik	114.662	141.716	133.64	100.869	143.657	131.95	-0.0734136	6.99731	0.167754	0.682	1
2410002I01Rik	13.3583	12.2665	15.4716	12.5684	12.9485	18.5237	0.0639247	3.81948	0.0960973	0.757	1
2410002O22Rik	109.324	83.0479	108.672	86.2347	104.217	108.496	-0.0276601	6.64068	0.0269395	0.87	1
2410003K15Rik	34.0291	40.0961	22.2347	41.2311	35.8209	22.91	0.0359626	5.05655	0.0398416	0.842	1
2410004B18Rik	34.3155	45.5393	28.7661	41.6292	46.9852	32.3349	0.137104	5.27427	0.573065	0.449	1
2410004I01Rik	1.41725	1.76331	0.602189	1.32698	2.48096	0.797499	0.285915	0.605795	0.51876	0.471	1
2410004N09Rik	3.72405	5.25159	1.94553	5.59227	4.63905	2.06625	0.149325	2.02109	0.234111	0.628	1
2410004P03Rik	1.17602	1.18832	1.01909	0.928886	1.24048	5.29249	0.635055	0.797758	1.69124	0.193	1
2410006H16Rik	14.3534	16.4064	8.56961	18.2554	18.7771	9.64248	0.222227	3.87413	1.11194	0.292	1
2410015M20Rik	113.169	128.146	64.3879	146.897	102.314	69.2736	0.050793	6.72575	0.0769716	0.781	1
2410016O06Rik	21.3643	23.498	26.8669	20.4924	20.8672	26.4987	-0.102864	4.53666	0.317901	0.573	1
2410017P09Rik	9.18197	13.2056	8.7549	13.8385	11.963	8.66373	0.11893	3.47682	0.231035	0.631	1
2410018M08Rik	5.97054	6.76573	6.06821	5.30792	8.20754	7.75749	0.152308	2.74857	0.313542	0.576	1
2410022L05Rik	39.5775	58.17	31.4065	52.7	47.495	31.7187	0.0105456	5.46531	0.00297984	0.956	1
2410042D21Rik	24.1686	19.1472	25.6625	17.6678	27.8003	33.7849	0.158191	4.61533	0.563066	0.453	1
2410066E13Rik	54.8204	74.0972	108.023	48.9655	118.44	118.61	0.270163	6.42966	1.02836	0.311	1
2410075B13Rik	11.0063	13.1481	10.8394	10.9381	16.0922	13.1587	0.180388	3.65713	0.598811	0.439	1
2410080I02Rik	2.23141	2.3958	0.926444	2.10421	1.29146	1.5225	-0.127452	0.88627	0.107896	0.743	1
2410089E03Rik	22.2086	27.6379	23.5317	22.0468	26.4579	29.4349	0.0595138	4.65706	0.0963154	0.756	1
2410091C18Rik	77.3155	76.3397	55.1697	79.96	77.1135	59.2686	0.0386539	6.16104	0.0607378	0.805	1
2410127L17Rik	15.8611	15.1606	11.7658	14.047	13.2884	12.2525	-0.120903	3.79492	0.337273	0.561	1
2410131K14Rik	33.6521	50.8484	36.5482	46.3495	48.6675	38.2799	0.115931	5.41814	0.352011	0.553	1
2410133F24Rik	1.19109	1.05415	1.76024	0.796188	0.866635	1.2325	-0.472773	0.213645	1.63956	0.2	1
2410137F16Rik	1.13078	1.18832	0.787477	1.11845	1.10453	1.45	0.195499	0.244499	0.258833	0.611	1
2500002B13Rik	4.0859	4.42743	2.26979	4.09468	3.82339	2.89999	0.0177004	1.89867	0.00362065	0.952	1
2500003M10Rik	168.336	180.432	169.447	162.062	193.786	174.942	0.0152595	7.45292	0.00924147	0.923	1
2500004C02Rik	6.5887	6.20991	7.27259	5.95245	6.8821	6.30749	-0.0788305	2.71907	0.0936847	0.76	1
2510002D24Rik	27.9078	38.5244	18.3436	30.748	28.9218	23.6712	-0.00416545	4.82811	0.000431644	0.983	1
2510003E04Rik	251.592	220.318	251.391	204.222	220.227	230.26	-0.16151	7.84313	1.07627	0.3	1
2510006D16Rik	83.4368	100.758	60.1262	100.111	92.8999	68.3674	0.0885043	6.41425	0.289862	0.59	1
2510009E07Rik	70.8323	55.3142	107.56	46.6149	73.664	102.515	-0.0885117	6.22974	0.2121	0.645	1
2510012J08Rik	57.3986	74.0014	69.7149	46.4443	61.2082	79.6774	-0.14984	6.00939	0.651785	0.419	1
2510039O18Rik	36.2756	43.1244	52.7147	35.5251	45.6598	61.3711	0.0737569	5.50468	0.176821	0.674	1
2510046G10Rik	1.17602	0.881653	0.555866	1.30802	1.13852	0.869998	0.342108	0.103341	0.765131	0.382	1
2610001J05Rik	141.363	140.988	86.3446	140.565	139.12	99.7598	0.0423213	6.97827	0.0761816	0.783	1
2610002D18Rik	13.5091	14.8348	9.40341	15.0517	11.0963	9.85998	-0.071585	3.64411	0.0971202	0.755	1
2610002I17Rik	26.8373	27.6763	24.1802	25.8003	31.1989	21.605	-0.0266817	4.72572	0.0207116	0.886	1
2610002J02Rik	64.0627	83.6612	51.5103	74.7469	67.6315	45.2037	-0.115221	6.03028	0.418132	0.518	1
2610002M06Rik	27.6062	28.4046	27.2838	27.4495	33.289	25.9187	0.036891	4.83289	0.0410379	0.839	1
2610005L07Rik	10.8857	9.41069	7.73581	6.44533	8.22454	14.7175	-0.0361816	3.24988	0.0152493	0.902	1
2610008E11Rik	27.3499	23.3063	34.4174	18.1607	32.2354	33.7487	-0.0348799	4.80799	0.0257201	0.873	1
2610015P09Rik	32.5063	31.7012	18.2509	38.198	27.7833	19.14	0.0353711	4.83013	0.0336204	0.855	1
2610017I09Rik	194.962	238.813	100.565	282.76	220.006	97.6573	0.112178	7.59485	0.373669	0.541	1
2610018G03Rik	3.40743	2.14663	2.68669	1.38385	2.48096	4.71249	-0.112879	1.47778	0.0839471	0.772	1
2610019E17Rik	2.23141	2.14663	0.926444	2.9004	2.27704	1.48625	0.35101	1.08471	1.06487	0.302	1
2610019F03Rik	11.5642	9.02736	12.368	14.9759	10.5186	18.7412	0.389897	3.67799	2.70999	0.0997	1
2610020C07Rik	1.76402	1.82081	1.57495	2.46439	2.00516	1.885	0.289362	0.993744	0.743382	0.389	1
2610020H08Rik	9.49859	6.99573	8.19903	6.33159	7.20497	8.44624	-0.195443	2.96439	0.599952	0.439	1
2610021A01Rik	18.7861	12.3048	19.0384	13.7058	16.9249	16.0225	-0.111667	4.01247	0.239684	0.624	1
2610021K21Rik	19.3289	19.473	18.6678	19.6962	16.585	15.8775	-0.155957	4.20307	0.603831	0.437	1
2610027L16Rik	63.0224	69.0181	70.2245	58.1407	65.3375	69.0924	-0.0912361	6.04019	0.323946	0.569	1
2610029G23Rik	69.6563	101.448	56.1425	107.732	92.8829	64.9599	0.204937	6.37998	1.19343	0.275	1
2610029I01Rik	14.9414	16.9047	10.7004	16.3218	19.032	10.73	0.0877919	3.91077	0.172649	0.678	1
2610034B18Rik	86.3166	84.6771	77.497	82.6708	78.269	70.5786	-0.119644	6.33013	0.575278	0.448	1
2610034M16Rik	1.5831	0.287496	1.20438	0.758274	0.917613	0.833749	-0.287378	-0.0370069	0.274593	0.6	1
2610035D17Rik	42.8643	49.8518	40.1613	38.5203	56.7221	36.6849	-0.037424	5.47509	0.0383746	0.845	1
2610035F20Rik	10.1318	7.39822	6.11453	7.75335	7.76573	7.90249	-0.0177535	2.9897	0.00479811	0.945	1
2610039C10Rik	35.1749	45.4243	29.5536	45.9893	48.7015	32.5524	0.183884	5.32393	1.05525	0.304	1
2610044O15Rik	2.89481	4.04411	0.972766	3.75346	4.19723	0.906248	0.116764	1.58203	0.122165	0.727	1
2610101N10Rik	164.507	165.214	124.56	203.236	184.627	139.055	0.192732	7.36755	1.47933	0.224	1
2610109H07Rik	58.1072	81.093	117.38	65.6855	78.5749	77.4299	-0.18461	6.31228	0.776191	0.378	1
2610203C20Rik	9.70967	14.8731	11.2563	10.6158	19.8476	13.7025	0.277696	3.74786	1.02764	0.311	1
2610204G22Rik	1.14586	1.28415	0.648511	1.81986	1.68229	1.015	0.550406	0.449457	2.24225	0.134	1
2610206C17Rik	0.99509	1.07332	0.231611	0.853058	0.577757	0.0724999	-0.664626	-0.420091	1.98362	0.159	1
2610301B20Rik	98.4386	93.6278	87.271	93.2487	97.0461	92.0023	-0.00109337	6.5534	5.07e-05	0.994	1
2610301G19Rik	97.4887	89.2387	137.855	72.7753	102.671	128.18	-0.114604	6.69741	0.448883	0.503	1
2610305D13Rik	0.980013	0.268329	1.01909	0.985756	0.679714	0.471249	-0.048277	-0.354144	0.0073047	0.932	1
2610307P16Rik	0.452314	0.958319	0.741155	0.66349	1.80124	0.761249	0.562804	-0.0541573	1.19677	0.274	1
2610316D01Rik	7.10133	6.82323	3.98371	7.65857	6.33833	4.45874	0.0422896	2.63976	0.0257986	0.872	1
2610507B11Rik	98.8909	73.3881	158.051	151.465	81.6336	142.535	0.231624	6.87047	0.885889	0.347	1
2610507I01Rik	7.61395	7.76238	7.9211	5.72497	6.57623	6.70624	-0.312354	2.8274	1.57859	0.209	1
2610524H06Rik	34.6774	46.7851	25.8478	47.2973	46.2035	29.5074	0.178421	5.28437	0.955316	0.328	1
2610528B01Rik	0.934782	1.45664	1.6676	1.2322	2.29403	2.42875	0.536301	0.752913	1.89883	0.168	1
2610528E23Rik	38.5974	48.4334	25.014	46.6149	44.0285	25.9912	0.0406115	5.27708	0.0527457	0.818	1
2700007P21Rik	38.7482	30.7812	57.0689	30.8049	34.9543	59.2324	-0.0531481	5.36996	0.0975081	0.755	1
2700023E23Rik	10.2675	11.0973	3.47416	9.28886	8.3095	6.92374	0.0943109	3.07747	0.109221	0.741	1
2700029M09Rik	144.409	169.258	84.3527	159.029	150.523	89.7186	-0.00125673	7.07632	6.15e-05	0.994	1
2700038G22Rik	2.38219	1.78247	1.76024	1.68716	1.51236	1.6675	-0.302248	0.895561	0.78177	0.377	1
2700046A07Rik	2.44249	4.10161	2.59404	4.11364	4.65604	2.03	0.174184	1.78893	0.251327	0.616	1
2700046G09Rik	4.96037	6.47824	4.40061	5.72497	5.28477	4.96624	0.00123827	2.43349	2.01e-05	0.996	1
2700049A03Rik	28.5862	28.1746	27.608	33.0987	34.0706	32.0449	0.21717	4.94138	1.60596	0.205	1
2700050L05Rik	18.2282	13.9531	18.5289	9.87652	16.1092	20.0462	-0.189079	4.00161	0.645542	0.422	1
2700060E02Rik	125.246	113.197	78.5624	138.158	143.097	82.3599	0.16564	6.8449	1.08366	0.298	1
2700062C07Rik	25.2391	28.1362	17.6488	27.4874	31.1139	19.72	0.125621	4.65799	0.477603	0.49	1
2700073G19Rik	2.94004	4.13994	2.0845	3.0331	2.44697	4.09624	0.0307731	1.6693	0.0073454	0.932	1
2700078E11Rik	19.5701	17.4606	30.5263	21.4023	21.9038	33.6762	0.181276	4.57461	0.987655	0.32	1
2700081O15Rik	25.4803	38.5628	66.4724	23.7719	47.6819	75.3636	0.14026	5.5011	0.32487	0.569	1
2700089E24Rik	87.5981	94.3944	86.5762	81.8178	100.275	98.4548	0.0424076	6.5171	0.0697138	0.792	1
2700094K13Rik	200.36	261.679	140.634	261.756	219.429	137.605	0.0110084	7.6916	0.00384348	0.951	1
2700097O09Rik	27.4253	25.7021	15.7032	23.8667	27.0696	17.6537	-0.00403474	4.5385	0.000487716	0.982	1
2810001G20Rik	17.007	20.1822	9.77398	22.0658	18.7941	11.1287	0.137366	4.07574	0.435109	0.509	1
2810002D19Rik	9.43828	11.9982	9.5887	13.63	16.3471	11.3825	0.39048	3.61085	2.83648	0.0921	1
2810002N01Rik	39.9695	53.6659	35.2049	52.738	48.2597	37.1924	0.0816321	5.49231	0.200776	0.654	1
2810004N23Rik	45.156	47.0726	37.1041	41.9705	41.9723	36.6487	-0.114284	5.39114	0.490644	0.484	1
2810006K23Rik	64.1683	81.1696	54.6602	76.5478	76.1109	59.3049	0.0678261	6.11511	0.161891	0.687	1
2810008D09Rik	27.6816	35.1128	14.4525	29.2315	24.8775	25.7737	0.106051	4.72799	0.216955	0.641	1
2810008M24Rik	43	39.4636	43.5429	42.3306	49.6191	40.5637	0.0546864	5.43493	0.0997587	0.752	1
2810011L19Rik	4.64376	3.62245	6.34614	3.69659	4.18024	5.03874	-0.170563	2.19399	0.358901	0.549	1
2810021B07Rik	33.7125	43.1627	27.886	43.6576	44.8781	30.3049	0.158609	5.2381	0.785447	0.375	1
2810021J22Rik	8.11149	6.17157	10.3299	8.09457	8.7853	13.5937	0.275113	3.18451	1.33059	0.249	1
2810025M15Rik	72.3853	90.4653	48.0824	93.7227	70.6732	46.9074	-0.018632	6.16103	0.0102052	0.92	1
2810029C07Rik	12.4386	11.3465	8.43064	10.7106	12.6427	12.2162	0.135354	3.51036	0.352785	0.553	1
2810030E01Rik	9.98106	9.58319	10.8857	9.25094	11.4532	12.7962	0.113075	3.41387	0.251641	0.616	1
2810032G03Rik	3.81451	2.52996	2.59404	2.10421	3.0757	3.08124	-0.140308	1.54733	0.176397	0.674	1
2810046L04Rik	21.5151	25.1271	28.0249	30.3689	29.7545	27.5862	0.2221	4.76366	1.32211	0.25	1
2810055F11Rik	14.9716	14.7198	15.0084	11.9618	14.9197	14.2462	-0.139056	3.84374	0.441261	0.507	1
2810055G20Rik	2.45757	3.85244	1.52863	4.41695	2.58291	2.57375	0.317115	1.59749	0.768184	0.381	1
2810403A07Rik	54.3832	42.511	62.2107	40.4918	46.5434	78.9886	-0.00666917	5.74234	0.00144443	0.97	1
2810403D21Rik	4.67391	6.47824	4.169	4.24633	5.99847	3.98749	-0.122195	2.33236	0.1735	0.677	1
2810405K02Rik	50.1013	72.0464	29.183	58.9179	57.096	29.3987	-0.0652214	5.65659	0.123092	0.726	1
2810407C02Rik	20.3994	26.3921	26.172	30.1983	25.1494	23.3087	0.0921571	4.66925	0.193679	0.66	1
2810408A11Rik	10.3278	16.1573	8.66225	10.9191	15.0896	10.8025	0.0634443	3.60481	0.0625793	0.802	1
2810408I11Rik	4.17636	4.19744	2.13082	4.72026	3.70444	2.89999	0.125425	1.91677	0.175183	0.676	1
2810408M09Rik	35.5217	43.0669	38.8643	37.2123	39.4404	42.9924	0.00505448	5.30619	0.000872566	0.976	1
2810410L24Rik	2.75911	2.89412	3.79842	2.48335	3.65346	4.92999	0.182978	1.76789	0.358651	0.549	1
2810417H13Rik	252.12	323.835	128.359	296.542	300.433	154.026	0.102422	7.94763	0.377423	0.539	1
2810422J05Rik	50.2219	56.9241	40.4856	58.425	49.5002	39.0049	-0.0266715	5.63387	0.0238292	0.877	1
2810422O20Rik	12.0919	11.6915	9.1718	10.5021	11.1303	9.85998	-0.0761159	3.44166	0.118502	0.731	1
2810428I15Rik	63.6255	88.3762	51.0007	84.0357	70.7242	53.2149	0.0198148	6.11679	0.0115447	0.914	1
2810429I04Rik	2.39726	1.95497	1.43599	1.70612	1.83523	1.74	-0.142658	0.9433	0.176687	0.674	1
2810432D09Rik	56.7805	66.3732	44.7472	74.1781	53.6294	42.7024	-0.00146942	5.83677	6.16e-05	0.994	1
2810432L12Rik	72.5964	82.8179	88.9386	74.9554	65.5414	85.7311	-0.13211	6.29129	0.648738	0.421	1
2810433D01Rik	1.04032	0.325828	0.602189	0.985756	0.696707	0.507499	0.136867	-0.387877	0.0710829	0.79	1
2810442I21Rik	18.379	19.933	10.0519	20.4924	18.998	13.0137	0.131763	4.09828	0.430898	0.512	1
2810453I06Rik	0.361851	0.574991	0.8338	0.549749	0.509785	1.34125	0.329691	-0.534081	0.570275	0.45	1
2810455O05Rik	4.46283	4.36993	4.12268	3.92407	4.65604	4.71249	0.0157206	2.14674	0.00319855	0.955	1
2810468N07Rik	18.5147	21.6772	19.548	22.5586	18.0294	19.3212	-0.0115248	4.32709	0.00322257	0.955	1
2900002K06Rik	0.437237	1.13082	0.324255	0.568705	0.713699	0.471249	-0.0867408	-0.550374	0.0287259	0.865	1
2900005J15Rik	3.8899	3.60328	2.22347	4.47382	2.99074	4.92999	0.33764	1.90695	1.00177	0.317	1
2900006K08Rik	6.73948	9.94735	3.56681	9.36468	7.28993	5.72749	0.192956	2.86976	0.454747	0.5	1
2900008C10Rik	2.90989	4.46577	2.5014	3.81033	4.84296	2.32	0.113887	1.85144	0.123895	0.725	1
2900010M23Rik	93.825	127.437	57.9491	140.887	94.1234	61.7699	0.072685	6.61211	0.129363	0.719	1
2900011O08Rik	65.088	76.4739	62.2107	62.8988	90.4189	58.9424	0.0305877	6.12596	0.0273126	0.869	1
2900026A02Rik	8.72966	8.58654	10.9784	12.5873	10.0088	9.38873	0.17359	3.34047	0.463805	0.496	1
2900052L18Rik	2.26157	2.3958	2.5014	2.38856	3.05871	3.95124	0.345192	1.47403	1.20052	0.273	1
2900053A13Rik	25.4803	34.097	13.7114	41.724	31.1479	18.2337	0.3139	4.80877	2.33131	0.127	1
2900053O20Rik	1.89972	1.53331	0.741155	1.55446	1.58033	0.906248	-0.0313698	0.56509	0.00750098	0.931	1
2900055J20Rik	24.4702	28.6154	10.2835	33.2314	22.1077	13.5575	0.153594	4.49832	0.498671	0.48	1
2900056M20Rik	4.29698	3.66078	2.87198	4.28425	3.10969	2.28375	-0.183546	1.82271	0.348994	0.555	1
2900064A13Rik	154.45	154.098	113.814	175.768	143.946	113.97	0.0192699	7.1717	0.0137779	0.907	1
2900076A07Rik	8.56381	9.10403	4.44693	8.37893	8.08859	4.38624	-0.090049	2.88328	0.131263	0.717	1
2900079G21Rik	2.87973	3.69911	2.9183	4.01885	2.99074	2.57375	-0.00429053	1.70981	0.000181062	0.989	1
2900092E17Rik	30.109	36.9911	43.126	33.0418	31.9465	54.5199	0.0625296	5.24541	0.125651	0.723	1
3000002C10Rik	6.42286	7.87738	4.30796	4.39799	6.30434	5.50999	-0.194695	2.56273	0.447548	0.504	1
3010001F23Rik	2.3068	2.87496	0.8338	2.18004	3.29661	0.833749	0.0517255	1.14663	0.0212145	0.884	1
3010003L10Rik	7.47826	8.91237	5.74395	9.4026	6.06644	6.48874	-0.0147854	2.90451	0.0028952	0.957	1
3010003L21Rik	1.31171	2.68329	1.99185	2.12317	3.26263	1.63125	0.194145	1.17033	0.234498	0.628	1
3010026O09Rik	19.4344	24.418	18.0657	21.1938	19.3718	16.4937	-0.135124	4.32529	0.454943	0.5	1
3110001D03Rik	60.8664	67.619	38.7717	74.9554	66.2211	41.0349	0.102107	5.88682	0.372348	0.542	1
3110001I22Rik	5.17145	5.46242	2.82565	4.58756	6.10043	5.69124	0.297848	2.34191	0.980595	0.322	1
3110002H16Rik	39.9996	35.1703	39.5592	33.3072	41.5135	38.4249	-0.036065	5.24966	0.0437817	0.834	1
3110003A17Rik	10.5088	12.6498	8.43064	14.6916	15.9053	9.71498	0.32351	3.60938	2.0603	0.151	1
3110007F17Rik	1.43233	0.958319	1.38967	1.40281	1.78425	1.5225	0.314511	0.550606	0.719671	0.396	1
3110009E18Rik	8.33765	12.1898	6.43879	15.355	13.6283	6.23499	0.313211	3.4142	1.41638	0.234	1
3110021A11Rik	1.82433	2.20413	1.01909	3.16579	2.20907	1.2325	0.370804	1.05063	1.09452	0.295	1
3110035E14Rik	8.71458	14.7006	9.86663	7.96188	15.9563	10.8387	0.0403863	3.51693	0.0183998	0.892	1
3110039M20Rik	14.2931	18.1122	7.0873	19.6772	18.3013	8.19249	0.208316	3.87569	0.914825	0.339	1
3110040N11Rik	20.324	23.6705	10.4688	23.4686	22.3286	10.6575	0.0330851	4.24306	0.0278354	0.867	1
3110043O21Rik	25.4803	30.4362	30.2021	23.3738	34.5295	37.8812	0.120228	4.91698	0.371206	0.542	1
3110045C21Rik	2.84958	3.83328	2.31611	4.01885	4.07828	2.2475	0.169679	1.74484	0.292809	0.588	1
3110047P20Rik	3.73913	2.66413	1.99185	3.99989	2.70186	3.91499	0.332328	1.69723	0.946135	0.331	1
3110052M02Rik	4.20652	3.90994	3.28888	2.78666	7.06902	2.97249	0.126742	2.05433	0.12211	0.727	1
3110053B16Rik	6.48316	10.7715	6.99465	8.11353	12.4727	7.57624	0.188943	3.15016	0.437495	0.508	1
3110056K07Rik	7.58379	9.65986	4.72486	9.68695	7.98664	6.99624	0.185559	2.98961	0.503834	0.478	1
3110056O03Rik	38.1602	41.5144	56.0499	33.3261	39.9842	57.2024	-0.0898552	5.45883	0.2893	0.591	1
3110057O12Rik	8.8955	7.53239	8.38432	6.74864	9.46501	11.02	0.0964551	3.1159	0.148531	0.7	1
3110062M04Rik	5.08099	6.01824	5.60499	6.44533	5.59065	4.45874	-0.0376636	2.49355	0.0178901	0.894	1
3110070M22Rik	1.01017	1.43748	0.926444	1.49759	1.03656	1.0875	0.0925078	0.303407	0.0551589	0.814	1
3110079O15Rik	1.08555	0.881653	0.555866	0.701403	0.322864	0.543749	-0.699081	-0.414704	2.1761	0.14	1
3110082D06Rik	15.2279	13.6081	12.507	16.3218	11.6741	16.4212	0.0845843	3.84334	0.139014	0.709	1
3110082I17Rik	38.4316	42.2427	27.6544	41.1174	31.0799	33.7849	-0.0291801	5.1711	0.0240255	0.877	1
3110082J24Rik	2.27665	2.3383	2.03818	2.10421	1.15551	1.5225	-0.487456	0.978103	1.78227	0.182	1
3200002M19Rik	9.49859	10.9057	9.40341	9.25094	9.60096	11.4187	-0.00455534	3.32969	0.000387855	0.984	1
3222401L13Rik	4.4176	4.36993	4.169	5.27	3.73843	3.18999	-0.106806	2.10104	0.124016	0.725	1
3230401D17Rik	15.1374	15.4289	9.95927	13.9712	16.0752	13.4125	0.102431	3.82399	0.233875	0.629	1
3300002I08Rik	2.17111	2.87496	1.80657	2.55917	2.90578	2.465	0.20016	1.34801	0.378514	0.538	1
3632451O06Rik	14.1273	8.79737	12.1827	10.7864	10.0088	14.6087	-0.0236059	3.5514	0.00935764	0.923	1
3830406C13Rik	48.8197	45.3668	43.3576	41.2501	48.8034	41.4337	-0.0826492	5.4932	0.249419	0.617	1
3830431G21Rik	3.22651	1.91664	3.19623	2.18004	1.71628	2.86375	-0.336812	1.33879	0.968775	0.325	1
4430402I18Rik	4.35729	4.06327	3.84474	4.15155	4.79198	5.29249	0.188225	2.158	0.456154	0.499	1
4631405J19Rik	4.43268	2.93246	2.96462	5.11835	2.73585	2.89999	0.0450224	1.85493	0.0168411	0.897	1
4632404H12Rik	2.47265	3.46911	3.52049	3.26058	3.36458	3.37124	0.0724436	1.71605	0.0537858	0.817	1
4632411B12Rik	40.467	30.2062	53.5948	25.8951	31.9465	57.1299	-0.180122	5.29595	0.978058	0.323	1
4632415K11Rik	15.8611	15.4673	20.4281	14.0849	16.3641	19.5387	-0.0662509	4.07876	0.111828	0.738	1
4632415L05Rik	12.6346	24.3605	12.8776	19.8289	15.7524	14.935	0.0129726	4.08436	0.00246446	0.96	1
4632419I22Rik	47.1914	34.2887	49.3331	35.6957	34.0197	41.6149	-0.246674	5.33166	1.9029	0.168	1
4632427E13Rik	28.8727	27.7529	21.1229	26.3879	23.0593	41.6149	0.170887	4.80694	0.569401	0.45	1
4632428N05Rik	4.53822	3.12412	4.49325	3.54493	3.29661	5.76374	-0.010308	2.04072	0.00119709	0.972	1
4632434I11Rik	11.926	9.69819	12.646	7.79126	11.7081	16.6387	0.0102271	3.53998	0.00176061	0.967	1
4732414G09Rik	1.32679	1.53331	0.787477	1.68716	1.56334	1.16	0.275647	0.520678	0.58001	0.446	1
4732415M23Rik	2.18618	1.51414	0.648511	2.18004	1.80124	1.16	0.285907	0.768757	0.595266	0.44	1
4732418A04Rik	0.572931	0.517492	1.34334	0.322266	0.2379	1.34125	-0.636382	-0.546535	2.02772	0.154	1
4732418C07Rik	84.5375	72.5447	102.465	86.4811	73.647	97.7298	-0.0192943	6.42532	0.0134795	0.908	1
4732440D04Rik	0.467391	0.958319	0.370578	1.13741	0.679714	0.362499	0.257528	-0.418631	0.272407	0.602	1
4732471D19Rik	13.8106	9.60236	17.6024	8.72015	9.65193	19.8287	-0.194006	3.699	0.705601	0.401	1
4732487G21Rik	1.9751	2.03164	3.65945	1.72507	2.51494	3.33499	-0.00617212	1.33048	0.000352564	0.985	1
4732491K20Rik	5.56346	8.70154	4.49325	7.52587	8.92124	6.12624	0.262821	2.81565	0.900252	0.343	1
4831426I19Rik	0.407082	0.191664	1.52863	0.644533	0.271885	2.86375	0.687779	-0.17351	2.03064	0.154	1
4831440E17Rik	1.34186	1.18832	0.509544	1.68716	1.07055	1.2325	0.419546	0.332918	1.03462	0.309	1
4833420G17Rik	58.4239	54.1259	57.8101	43.2216	61.2422	67.6786	-0.0165449	5.82994	0.00875997	0.925	1
4833422C13Rik	3.84467	3.98661	3.89106	4.75817	4.40115	3.73374	0.12373	2.06463	0.185522	0.667	1
4833424O15Rik	12.7552	10.6182	15.0547	12.5494	11.4872	16.1675	0.0453917	3.70664	0.0446256	0.833	1
4833439L19Rik	189.731	215.583	246.11	175.578	247.45	269.12	0.062842	7.79997	0.131783	0.717	1
4833442J19Rik	8.21703	10.7715	7.87477	9.36468	11.0793	8.40999	0.0851326	3.23477	0.122171	0.727	1
4921504A21Rik	4.56837	4.29327	3.52049	4.60651	5.02988	2.71875	-0.0408483	2.0875	0.0195175	0.889	1
4921513D23Rik	3.07573	3.37328	5.55866	2.69187	3.61948	8.62748	0.169537	2.12793	0.330554	0.565	1
4921515J06Rik	1.62833	1.36081	1.15805	0.568705	0.917613	1.0875	-0.74581	0.228577	3.41817	0.0645	1
4921517L17Rik	9.73982	9.73652	8.15271	9.04242	9.77088	9.35248	0.0126335	3.23094	0.00301669	0.956	1
4921524J17Rik	33.5315	40.7286	24.8287	41.3638	51.3694	33.9662	0.343912	5.25001	3.74701	0.0529	1
4921530D09Rik	2.38219	2.47246	1.11173	2.82457	3.19465	1.16	0.237147	1.22422	0.515676	0.473	1
4921530L18Rik	1.62833	1.55248	0.277933	1.49759	1.49537	0.869998	0.289148	0.426752	0.496221	0.481	1
4921531C22Rik	7.2521	9.21903	5.4197	7.86709	10.2467	4.78499	0.0226481	2.93756	0.00726326	0.932	1
4921534H16Rik	0.557854	0.249163	0.370578	0.454964	0.305871	1.015	0.356556	-0.954224	0.433255	0.51	1
4921536K21Rik	0.42216	0.344995	1.15805	0.227482	0.4758	1.015	-0.167023	-0.774289	0.127706	0.721	1
4922501C03Rik	33.7878	24.3988	28.2102	33.383	24.0279	36.1049	0.0910264	4.90516	0.195013	0.659	1
4922501L14Rik	1.7791	1.01582	1.34334	0.72036	0.900621	2.64625	-0.239239	0.480693	0.282851	0.595	1
4930402H24Rik	68.3295	61.5432	87.0394	54.2355	65.2185	84.7161	-0.11183	6.12291	0.483383	0.487	1
4930412C18Rik	2.56311	2.12747	3.10359	1.49759	2.56592	3.15374	-0.151323	1.32387	0.200521	0.654	1
4930412F15Rik	2.23141	2.41496	2.96462	2.48335	2.46396	3.08124	0.0645827	1.39405	0.0428928	0.836	1
4930420K17Rik	17.9719	16.0998	15.6106	19.0706	16.8739	14.79	0.0128715	4.07867	0.00398708	0.95	1
4930422G04Rik	5.77454	3.81411	7.22626	4.34112	4.31618	6.48874	-0.165272	2.40378	0.344024	0.558	1
4930427A07Rik	27.1388	28.5579	34.6953	25.0989	24.2148	39.4399	-0.0742011	4.88906	0.179524	0.672	1
4930429B21Rik	2.17111	1.66748	1.80657	1.91464	1.88621	1.885	-0.00468591	0.961179	0.000196807	0.989	1
4930430F08Rik	22.6308	21.083	21.9104	19.7341	22.3116	22.8737	-0.0347989	4.44643	0.0356336	0.85	1
4930432K21Rik	8.38288	5.59658	6.62407	4.834	6.89909	5.79999	-0.249481	2.68236	0.788981	0.374	1
4930441O14Rik	2.09572	1.80164	1.99185	2.00943	2.17508	1.885	0.0345571	1.03717	0.011004	0.916	1
4930444A02Rik	48.473	49.1618	55.4477	45.5912	51.4543	53.2512	-0.0431172	5.65962	0.0699948	0.791	1
4930444P10Rik	0.633239	0.459993	0.370578	0.549749	1.00258	0.978748	0.730497	-0.475802	2.51074	0.113	1
4930447C04Rik	2.23141	2.31913	0.8338	1.44072	1.76726	1.9575	-0.0242383	0.885044	0.00361227	0.952	1
4930447M23Rik	1.17602	1.43748	0.324255	0.511835	1.54635	0.869998	0.100309	0.105121	0.0382459	0.845	1
4930451C15Rik	1.89972	1.53331	1.89921	1.13741	1.34243	1.9575	-0.324597	0.723792	0.867953	0.352	1
4930452B06Rik	9.67952	9.1807	7.45787	6.82447	9.22711	9.96873	-0.042367	3.13285	0.0282078	0.867	1
4930453N24Rik	30.7875	35.5345	30.0168	30.3499	38.5398	30.4499	0.0244797	5.03608	0.0183072	0.892	1
4930455C21Rik	7.40287	6.20991	7.17994	7.01403	8.22454	6.70624	0.0640712	2.84737	0.0625049	0.803	1
4930455F23Rik	46.4376	44.1402	33.4909	42.634	48.4806	33.4224	-0.0123019	5.38754	0.00555842	0.941	1
4930471M23Rik	50.6139	42.7602	64.3879	40.9089	47.478	59.1599	-0.110832	5.66039	0.441676	0.506	1
4930473A06Rik	6.93548	5.36659	5.55866	3.48806	4.80897	7.90249	-0.238921	2.50067	0.61123	0.434	1
4930480K23Rik	2.20126	1.36081	2.13082	1.99047	1.75026	2.06625	0.0211745	0.967096	0.00364704	0.952	1
4930503L19Rik	14.3233	11.3465	10.0982	9.08033	13.1864	14.3912	0.00789831	3.59665	0.00102603	0.974	1
4930506C21Rik	0.889551	1.39915	2.13082	1.55446	1.64831	2.64625	0.413593	0.764061	1.31474	0.252	1
4930506M07Rik	7.76472	10.0623	5.37337	7.69648	13.1525	11.0562	0.46364	3.21366	2.63292	0.105	1
4930512B01Rik	0.588008	0.824154	0.277933	1.38385	0.526778	0.471249	0.512141	-0.382565	1.01377	0.314	1
4930513N10Rik	0.919705	0.459993	1.6676	0.701403	0.458807	1.63125	-0.19696	-0.0887137	0.20807	0.648	1
4930518I15Rik	0.482468	0.90082	0.509544	1.08054	0.662721	1.595	0.707424	-0.149389	2.21539	0.137	1
4930520O04Rik	1.02524	2.1083	0.972766	1.38385	2.24306	1.12375	0.195501	0.650541	0.222356	0.637	1
4930522L14Rik	5.48807	4.48493	3.93739	4.34112	4.758	4.67624	-0.0288247	2.22957	0.010722	0.918	1
4930523C07Rik	1.4474	0.862487	3.24255	2.02838	1.22348	5.18374	0.537122	1.15403	2.14605	0.143	1
4930524J08Rik	1.11571	1.51414	1.52863	1.32698	0.866635	1.05125	-0.356065	0.351455	0.816574	0.366	1
4930526A20Rik	1.34186	2.08914	1.85289	1.40281	1.61432	1.19625	-0.33133	0.711688	0.790864	0.374	1
4930529M08Rik	1.01017	0.536659	0.741155	0.511835	0.407828	3.69749	0.198195	0.124253	0.104938	0.746	1
4930534B04Rik	13.3131	11.5573	19.3627	10.8812	16.2961	19.1762	0.0621859	3.90394	0.0765885	0.782	1
4930547N16Rik	8.82012	4.65743	10.1909	5.99036	6.71217	8.11999	-0.179329	2.88399	0.382968	0.536	1
4930550C14Rik	2.98527	2.4533	1.29702	2.57813	2.41298	1.6675	0.0014962	1.23364	2.17e-05	0.996	1
4930550G17Rik	3.72405	4.69576	1.43599	5.64914	4.09528	1.55875	0.178498	1.89973	0.315988	0.574	1
4930555I21Rik	1.47756	1.26498	1.48231	1.00471	0.815656	2.5375	-0.170156	0.5106	0.181028	0.67	1
4930558J18Rik	4.68899	4.10161	2.77933	4.26529	3.43255	2.57375	-0.178471	1.91304	0.363196	0.547	1
4930563E22Rik	4.10098	6.40157	4.53958	6.44533	7.28993	5.79999	0.359058	2.55135	1.56999	0.21	1
4930570G19Rik	4.64376	5.21326	3.56681	5.68705	6.62721	3.80624	0.237466	2.34009	0.729745	0.393	1
4930572J05Rik	2.47265	2.2808	6.57775	2.97623	2.24306	7.03249	0.104924	1.92147	0.124667	0.724	1
4930578M01Rik	2.20126	3.10495	1.34334	2.55917	3.16067	1.595	0.13511	1.29467	0.161178	0.688	1
4930578N16Rik	8.14165	8.81653	4.44693	9.32677	7.91866	5.32874	0.0831953	2.91289	0.109338	0.741	1
4930579G22Rik	2.59327	2.58746	1.11173	2.5023	1.86921	1.16	-0.170219	1.06998	0.247804	0.619	1
4930579G24Rik	36.0343	36.5311	37.0578	36.6246	36.6706	38.6062	0.0121305	5.20925	0.00539439	0.941	1
4930579K19Rik	2.15603	3.25828	1.38967	2.65396	2.48096	2.06625	0.0988056	1.28648	0.082095	0.774	1
4930580A09Rik	0.693548	1.05415	0.277933	0.872015	0.917613	0.362499	0.106773	-0.332076	0.0594915	0.807	1
4930581F22Rik	2.35203	3.54578	2.73301	2.29378	2.46396	3.04499	-0.180244	1.47545	0.299541	0.584	1
4930594M22Rik	1.40217	1.16915	0.972766	2.27482	1.07055	1.99375	0.564771	0.619651	1.89358	0.169	1
4930599N23Rik	2.3068	2.77913	2.31611	2.36961	2.379	3.44374	0.0944683	1.39572	0.0852525	0.77	1
4931406C07Rik	19.9169	25.2996	23.3927	30.2551	23.1952	22.5112	0.128807	4.60212	0.373281	0.541	1
4931406P16Rik	15.243	6.4399	20.706	12.4167	10.6545	23.1275	0.100502	3.85677	0.12517	0.723	1
4931408A02Rik	4.16129	3.83328	4.86383	5.5354	5.60764	5.50999	0.369154	2.31153	1.78634	0.181	1
4931414P19Rik	6.86009	6.20991	10.0056	5.13731	8.0716	9.31623	-0.0425302	2.9158	0.0257095	0.873	1
4931415C17Rik	2.06557	2.4533	0.972766	2.65396	2.02215	1.6675	0.240241	1.06079	0.468223	0.494	1
4931428F04Rik	12.4989	15.8506	20.1502	11.6964	20.2045	18.3425	0.0478253	4.03636	0.0376755	0.846	1
4931440F15Rik	0.633239	0.843321	0.602189	0.625576	0.645728	1.305	0.16617	-0.313721	0.142378	0.706	1
4931440P22Rik	2.53296	3.41162	3.01094	2.42648	2.48096	3.29874	-0.163942	1.53189	0.26779	0.605	1
4932415G12Rik	12.7854	13.9915	15.1474	13.4025	17.2307	18.705	0.21121	3.92526	1.01452	0.314	1
4932425I24Rik	1.11571	0.574991	1.29702	0.682447	0.730692	4.05999	0.348628	0.416679	0.539297	0.463	1
4932438A13Rik	43.588	33.1962	43.0333	36.8711	33.6288	51.7287	-0.0101895	5.32582	0.0032751	0.954	1
4932443I19Rik	1.46248	1.30331	0.926444	1.19428	1.01957	1.2325	-0.123594	0.327629	0.107396	0.743	1
4933400F03Rik	0.934782	1.70581	0.602189	1.00471	1.49537	1.63125	0.337663	0.371884	0.566113	0.452	1
4933403F05Rik	34.9186	28.2129	42.4775	26.4258	30.91	43.8987	-0.0947125	5.09523	0.294272	0.587	1
4933403G14Rik	9.90567	6.88073	10.1446	6.69177	10.9094	9.09873	-0.0227186	3.1636	0.00691587	0.934	1
4933404M02Rik	4.49298	4.31244	3.14991	4.60651	4.19723	2.57375	-0.0988381	2.00678	0.11538	0.734	1
4933404O12Rik	18.5147	15.1989	20.1965	15.5257	18.2163	22.9462	0.0439288	4.19775	0.0496043	0.824	1
4933405L10Rik	0.99509	0.517492	0.648511	1.06158	0.628735	0.833749	0.2054	-0.253741	0.206134	0.65	1
4933406C10Rik	0.603085	0.670823	0.277933	1.06158	0.492792	0.2175	0.156689	-0.634234	0.0957366	0.757	1
4933406P04Rik	0.301543	0.632491	0.555866	0.322266	1.4274	0.724999	0.727781	-0.487826	1.53257	0.216	1
4933407C03Rik	126.678	151.089	157.449	123.144	146.818	139.127	-0.106685	7.1376	0.406792	0.524	1
4933407H18Rik	7.38779	8.27988	10.5615	6.21785	7.42587	13.5212	-0.0359811	3.1352	0.0215984	0.883	1
4933407K13Rik	0.949859	1.03498	0.972766	0.872015	0.917613	0.978748	-0.114532	0.0025887	0.090857	0.763	1
4933407L21Rik	5.35238	5.51992	3.47416	4.90982	3.61948	3.62499	-0.2365	2.18025	0.661043	0.416	1
4933411K20Rik	31.0137	27.2354	24.4581	26.6723	30.1283	26.7525	0.000675207	4.80055	1.48e-05	0.997	1
4933416E14Rik	1.83941	1.74414	2.36243	2.16108	2.29403	1.77625	0.0791304	1.05637	0.0525499	0.819	1
4933417D19Rik	0.633239	0.804988	1.06541	0.834101	1.20649	1.34125	0.43754	0.00706868	1.2134	0.271	1
4933421E11Rik	17.9116	12.9756	14.0356	18.6915	17.7745	18.0887	0.265904	4.059	1.61301	0.204	1
4933421O10Rik	4.46283	5.15576	4.44693	4.22738	4.48611	5.58249	-0.0100826	2.25245	0.00131102	0.971	1
4933424B01Rik	49.4228	39.4827	50.9544	38.198	45.7617	51.9824	-0.0631496	5.51796	0.136752	0.712	1
4933426D04Rik	0.572931	0.939153	0.185289	1.11845	0.968592	0.18125	0.394524	-0.373384	0.708293	0.4	1
4933426M11Rik	33.8482	25.1463	48.1751	26.4258	32.4393	54.1574	0.0364378	5.17612	0.0404842	0.841	1
4933427D14Rik	16.5095	16.8089	15.9348	12.1703	14.8517	15.7687	-0.227155	3.94305	1.22003	0.269	1
4933427G17Rik	1.7791	1.26498	0.602189	1.28907	1.34243	0.906248	-0.01416	0.378783	0.00132795	0.971	1
4933430I17Rik	0.934782	0.632491	0.648511	1.11845	0.645728	0.942498	0.26338	-0.191095	0.369564	0.543	1
4933431E20Rik	40.9947	38.6203	71.8457	34.1792	37.2823	63.0749	-0.184272	5.55549	1.28395	0.257	1
4933432B09Rik	1.46248	0.958319	1.06541	1.17532	1.30845	1.6675	0.203364	0.39835	0.287777	0.592	1
4933433P14Rik	33.1998	33.2537	29.8778	33.5726	32.4563	37.8812	0.0888268	5.06284	0.271151	0.603	1
4933434E20Rik	50.3727	55.4675	56.5131	47.5059	56.7901	66.5186	0.0441246	5.79099	0.0712375	0.79	1
4933436C20Rik	1.20617	1.53331	0.463222	1.36489	1.34243	1.05125	0.276297	0.330581	0.478325	0.489	1
4933439C10Rik	18.6052	18.9555	14.1283	13.0613	15.2086	29.5437	0.0493953	4.17651	0.0343012	0.853	1
4933439F18Rik	34.7075	28.8454	40.9951	22.5586	34.6994	45.6749	-0.0687223	5.09807	0.122981	0.726	1
5031425E22Rik	12.1371	13.6081	11.4416	11.9428	14.0531	17.3275	0.184589	3.74639	0.693578	0.405	1
5031434O11Rik	5.02068	4.48493	3.24255	4.79608	4.45212	10.295	0.483188	2.41726	1.95679	0.162	1
5031439G07Rik	48.88	51.4617	66.3334	39.9989	51.2674	72.4999	-0.0686602	5.77028	0.166719	0.683	1
5033411D12Rik	23.5354	13.9531	15.379	13.0044	14.8687	11.7087	-0.430885	3.95905	3.38737	0.0657	1
5033414D02Rik	81.6879	101.007	49.1015	101.533	98.7454	52.1274	0.0995713	6.35972	0.355466	0.551	1
5033430I15Rik	3.28681	4.08244	2.31611	4.07572	3.61948	2.42875	0.052187	1.7771	0.0294316	0.864	1
5133401N09Rik	20.5652	32.1612	15.7495	29.4021	30.6041	20.1912	0.222914	4.65399	1.12234	0.289	1
5330413P13Rik	1.01017	0.996652	1.29702	1.13741	1.10453	1.55875	0.177849	0.273481	0.238603	0.625	1
5330417C22Rik	9.46844	9.52569	10.2372	6.5022	9.41403	11.6725	-0.129852	3.23957	0.278615	0.598	1
5330426P16Rik	13.5393	16.6556	13.5261	16.5683	18.7941	14.355	0.164552	3.97565	0.603316	0.437	1
5330430P22Rik	2.08064	2.49163	1.15805	1.95256	1.56334	1.26875	-0.246585	0.891995	0.4941	0.482	1
5330434G04Rik	8.21703	7.28322	6.76304	7.05195	6.27036	10.585	0.0440561	2.9434	0.0276435	0.868	1
5330438D12Rik	7.93057	9.94735	6.48511	9.28886	10.7565	11.2737	0.348011	3.22571	1.95379	0.162	1
5430400D12Rik	3.78436	4.88743	2.03818	3.4691	3.63647	4.24124	0.10478	1.91356	0.0957338	0.757	1
5430402O13Rik	2.03541	1.97414	0.787477	1.19428	1.64831	0.906248	-0.323841	0.618889	0.771272	0.38	1
5430403G16Rik	5.30715	5.38575	5.0028	4.7013	6.79714	5.40124	0.0890945	2.4604	0.103751	0.747	1
5430405G05Rik	1.37202	1.89747	1.29702	2.23691	2.00516	1.05125	0.175732	0.79978	0.224771	0.635	1
5430405H02Rik	5.09607	8.18404	3.47416	6.78655	6.52525	4.92999	0.141423	2.58291	0.234139	0.628	1
5430407P10Rik	4.73422	1.60998	1.94553	4.36008	2.46396	4.92999	0.486838	1.76215	1.22734	0.268	1
5430411K18Rik	7.84011	8.41404	10.7004	8.79598	8.5474	8.62748	-0.0526638	3.14639	0.0459465	0.83	1
5430416N02Rik	10.0414	14.049	6.11453	13.7627	14.8687	6.05374	0.15233	3.47664	0.389711	0.532	1
5430417L22Rik	29.5964	27.0246	41.0878	25.478	23.9429	50.5687	-0.0488094	5.02078	0.0761696	0.783	1
5430435G22Rik	5.473	5.80741	7.31891	8.28414	5.99847	8.98998	0.311837	2.80347	1.38696	0.239	1
5430437P03Rik	118.25	156.34	105.893	141.191	137.506	98.3823	-0.0396367	6.99551	0.0525491	0.819	1
5530601H04Rik	20.128	29.8612	22.4663	26.0278	39.6443	27.3687	0.33585	4.79593	2.27726	0.131	1
5730403B10Rik	243.707	233.562	255.93	226.25	228.112	261.145	-0.0550976	7.914	0.129827	0.719	1
5730405O15Rik	0.708625	0.632491	1.15805	0.568705	0.390835	1.45	-0.232866	-0.312926	0.30392	0.581	1
5730409E04Rik	6.78471	10.0623	9.35708	13.1371	11.0963	8.04749	0.270571	3.30687	0.93136	0.335	1
5730419I09Rik	26.8674	25.2038	34.649	17.0043	26.6108	38.1349	-0.14575	4.79534	0.521738	0.47	1
5730437N04Rik	32.1294	35.4003	39.9297	53.7427	53.1876	30.3412	0.301652	5.36688	1.68194	0.195	1
5730455O13Rik	38.8085	45.961	29.6462	43.942	47.7669	28.3837	0.0386514	5.30881	0.0487162	0.825	1
5730455P16Rik	81.8839	75.4772	93.4782	69.0029	93.0358	87.7973	-0.0208194	6.38061	0.0149292	0.903	1
5730469M10Rik	422.416	407.554	352.975	379.516	357.054	296.379	-0.215626	8.53869	1.86653	0.172	1
5730480H06Rik	0.633239	1.26498	0.370578	0.568705	0.917613	0.543749	-0.131954	-0.32456	0.0758183	0.783	1
5730494M16Rik	44.764	47.8201	35.2049	47.6765	48.8544	41.0712	0.0957612	5.4785	0.345532	0.557	1
5730494N06Rik	36.5017	40.6711	31.5454	39.2028	40.307	34.8362	0.0581986	5.22691	0.121071	0.728	1
5730508B09Rik	3.73913	3.50745	2.77933	4.89087	3.38158	4.49499	0.333965	1.95228	1.18773	0.276	1
5730522E02Rik	1.80926	2.31913	0.880122	2.71083	2.5999	1.70375	0.511675	1.08585	2.22462	0.136	1
5730528L13Rik	20.5803	30.0146	19.5016	25.7434	31.9635	22.3662	0.172212	4.66101	0.693862	0.405	1
5730559C18Rik	1.04032	1.32248	1.94553	0.834101	1.98816	1.9575	0.157652	0.605276	0.147223	0.701	1
5730577I03Rik	3.43758	2.68329	3.14991	2.7677	3.94234	2.5375	-0.0194609	1.66011	0.00363219	0.952	1
5730590G19Rik	6.13639	5.55825	10.5151	5.64914	5.50568	9.42498	-0.114152	2.81521	0.2086	0.648	1
5830415F09Rik	8.78997	12.0557	7.96742	9.91443	10.1787	8.80873	-0.00736714	3.28563	0.000924883	0.976	1
5830417I10Rik	10.2524	10.0623	8.29167	8.85285	9.66893	7.39499	-0.158851	3.20452	0.468202	0.494	1
5830418K08Rik	20.0677	20.2397	13.5724	32.8712	21.0881	18.7775	0.42327	4.42201	3.77822	0.0519	1
5830428H23Rik	10.6595	13.4165	10.1446	14.6536	12.6427	14.3187	0.266426	3.67026	1.39186	0.238	1
5830433M19Rik	25.8573	25.6063	21.1692	26.6344	34.4445	25.5562	0.236922	4.74145	1.67784	0.195	1
5830444B04Rik	1.61325	1.20748	1.2507	1.47863	1.20649	2.13875	0.171654	0.600701	0.213006	0.644	1
5830454E08Rik	2.06557	2.3383	1.29702	2.44543	2.20907	1.2325	0.0291162	1.03236	0.00747418	0.931	1
5830462I19Rik	0.0452314	0.0574991	0.648511	0.0758274	0.152936	1.16	0.950268	-1.6881	2.40625	0.121	1
5930403N24Rik	1.89972	3.37328	3.05727	3.67763	6.76315	2.57375	0.580372	1.87538	2.07224	0.15	1
5930416I19Rik	32.1897	43.9868	35.0659	36.5109	38.4208	35.1262	-0.0341972	5.21303	0.0346928	0.852	1
5930434B04Rik	46.3923	48.4718	51.186	41.9705	52.0491	58.2536	0.0337123	5.63218	0.0410597	0.839	1
5S_rRNA	1.07048	0.977485	0	0.834101	0.560764	0.0362499	-0.435115	-0.498488	0.735453	0.391	1
6030405A18Rik	3.87482	4.6191	4.21532	3.69659	4.5031	3.40749	-0.146309	2.04517	0.249897	0.617	1
6030419C18Rik	2.78927	3.44995	3.14991	1.99047	2.93976	3.04499	-0.265597	1.55156	0.681627	0.409	1
6030422M02Rik	3.12097	3.00912	2.03818	3.31745	2.54893	2.71875	0.0680949	1.52671	0.0458463	0.83	1
6030429G01Rik	1.50771	0.709156	2.73301	1.0995	0.764678	4.63999	0.0768486	0.845694	0.0345459	0.853	1
6030442K20Rik	0.859396	1.16915	0.741155	1.28907	1.07055	1.16	0.328221	0.151703	0.705992	0.401	1
6030443J06Rik	1.88464	1.70581	1.11173	1.44072	2.10711	1.70375	0.150575	0.797101	0.17796	0.673	1
6030446N20Rik	17.7458	18.7831	23.3927	15.2413	26.016	26.1725	0.149916	4.40094	0.460875	0.497	1
6030458C11Rik	24.9225	18.3422	27.0985	18.881	20.9182	29.9787	-0.0493124	4.53527	0.0651057	0.799	1
6230400D17Rik	2.78927	2.52996	1.99185	2.36961	2.36201	2.71875	0.00402906	1.33571	0.000158315	0.99	1
6230409E13Rik	6.33239	4.82993	11.6269	3.4691	7.45986	9.96873	-0.114913	2.83639	0.138274	0.71	1
6230427J02Rik	4.86991	7.07239	3.70578	7.01403	6.04945	4.78499	0.188373	2.518	0.438562	0.508	1
6330403A02Rik	6.67917	7.47489	5.88292	8.18936	6.01547	8.73623	0.170979	2.85133	0.405873	0.524	1
6330403K07Rik	118.989	148.405	118.585	105.173	151.848	132.82	-0.00579255	7.0174	0.00101942	0.975	1
6330403L08Rik	1.49264	1.83997	1.85289	2.0663	1.30845	2.28375	0.093566	0.876882	0.0676105	0.795	1
6330406I15Rik	2.15603	1.53331	3.28888	1.85777	2.51494	3.66124	0.197647	1.30816	0.358272	0.549	1
6330407J23Rik	165.532	200.71	167.408	155.2	201.569	157.941	-0.0739925	7.45554	0.18629	0.666	1
6330408A02Rik	10.8405	6.99573	12.2754	7.94292	9.56697	11.2375	-0.0755856	3.28876	0.0904221	0.764	1
6330409D20Rik	0.241234	0.498326	0.370578	0.322266	1.34243	0.2175	0.648311	-0.795293	0.945997	0.331	1
6330409N04Rik	39.487	41.1502	33.7689	38.7288	41.3946	37.1562	0.0212802	5.27947	0.0168127	0.897	1
6330416G13Rik	6.57363	6.59323	9.5887	5.78184	4.96191	9.38873	-0.223345	2.82374	0.789218	0.374	1
6330418K02Rik	2.74404	2.81746	2.59404	3.12788	3.50053	3.62499	0.308716	1.64226	1.0573	0.304	1
6330439K17Rik	17.3689	15.0456	15.0084	10.6727	13.3394	13.6662	-0.353832	3.83139	2.76306	0.0965	1
6330503K22Rik	22.7212	23.4021	31.3138	20.227	29.7885	40.1649	0.176534	4.78892	0.835078	0.361	1
6330512M04Rik	11.8657	13.819	9.12547	11.2793	14.1211	9.96873	0.0117069	3.56884	0.00271215	0.958	1
6330527O06Rik	7.56872	7.51322	5.32705	6.74864	7.73174	4.38624	-0.141273	2.74536	0.300579	0.584	1
6330545A04Rik	1.4474	0.804988	1.99185	0.265396	1.1895	0.579999	-1.00086	0.0919631	3.24114	0.0718	1
6330549D23Rik	1.74895	0.977485	1.20438	2.48335	2.56592	1.595	0.735593	0.890297	3.88105	0.0488	1
6330578E17Rik	41.3113	30.6087	48.4067	26.8808	36.9424	52.3812	-0.095729	5.28579	0.257947	0.612	1
6430527G18Rik	58.9817	47.6285	102.65	61.3823	65.3885	111.287	0.18877	6.19815	1.30162	0.254	1
6430531B16Rik	1.22125	0.881653	0.463222	0.777231	0.441814	0.543749	-0.529092	-0.317737	1.33069	0.249	1
6430548M08Rik	61.575	54.3559	91.1621	47.9987	57.5378	82.7949	-0.15476	6.0275	0.902561	0.342	1
6430550D23Rik	1.64341	0.479159	0.8338	1.17532	1.08754	1.305	0.245394	0.197647	0.267023	0.605	1
6430571L13Rik	0.874473	1.53331	1.80657	1.40281	2.42998	2.13875	0.517967	0.78522	1.68909	0.194	1
6430573F11Rik	4.83976	4.42743	4.53958	2.99518	3.24563	5.00249	-0.359724	2.06647	1.5285	0.216	1
6430590A07Rik	9.28751	11.0398	4.35429	10.6348	7.5958	7.17749	0.101367	3.09582	0.13458	0.714	1
6430598A04Rik	14.278	18.6489	24.8287	12.0376	27.9192	19.6837	0.0525015	4.28796	0.0320267	0.858	1
6430704M03Rik	127.688	110.609	147.999	124.945	139.613	158.883	0.117273	7.07083	0.552528	0.457	1
6530401N04Rik	45.1409	46.421	33.6762	46.7476	39.3044	35.1624	-0.0556296	5.37421	0.10697	0.744	1
6530402F18Rik	5.97054	7.91571	10.8857	6.16098	8.59838	10.2587	0.0112569	3.04317	0.001847	0.966	1
6530409C15Rik	1.01017	1.53331	0.694833	0.815144	1.22348	0.543749	-0.334738	0.0841736	0.652005	0.419	1
6530411M01Rik	1.61325	2.2233	1.34334	2.19899	2.03914	1.16	0.0344514	0.897959	0.0094177	0.923	1
6530418L21Rik	14.2931	13.4356	13.665	14.502	12.3028	14.8625	-0.00888108	3.79679	0.00176015	0.967	1
6720401G13Rik	2.47265	1.70581	1.43599	1.49759	1.1895	3.00874	-0.121713	0.933757	0.086697	0.768	1
6720456B07Rik	173.357	228.157	131.37	226.572	209.369	138.656	0.0865908	7.54705	0.253	0.615	1
6720456H20Rik	23.0982	14.7389	29.4609	14.7295	17.3497	28.5287	-0.191011	4.39521	0.81157	0.368	1
6720463M24Rik	23.1735	19.3389	22.5589	19.4687	23.858	19.8287	-0.0588614	4.42381	0.0889421	0.766	1
6720483E21Rik	1.19109	0.709156	0.277933	0.417051	0.35685	0.616249	-0.656943	-0.57617	1.44441	0.229	1
6720489N17Rik	1.62833	1.16915	0.602189	1.08054	2.27704	0.688749	0.234534	0.442503	0.310993	0.577	1
6820408C15Rik	0.392005	0.670823	0.509544	0.568705	0.798664	1.48625	0.703264	-0.403985	2.30619	0.129	1
6820431F20Rik	5.65392	4.82993	3.3352	3.41223	3.99332	7.32249	-0.00184856	2.25339	3.03e-05	0.996	1
8030453O22Rik	0.784011	1.05415	0.741155	0.928886	0.679714	1.16	0.0414555	-0.0977408	0.00990357	0.921	1
8030462N17Rik	4.04067	3.67994	3.93739	3.50702	4.06129	3.76999	-0.054527	1.95912	0.0362597	0.849	1
8430406I07Rik	38.6276	35.5536	34.0931	33.7432	30.9949	34.5462	-0.141839	5.11689	0.701718	0.402	1
8430408G22Rik	4.43268	2.77913	2.0845	10.5211	1.69928	4.63999	0.883909	2.17049	3.00425	0.083	1
8430410A17Rik	35.9137	40.4986	31.3138	38.0274	38.2339	31.9724	-0.00938959	5.18161	0.00307328	0.956	1
8430410K20Rik	70.1388	69.3631	73.1891	61.4012	80.4271	76.4149	0.017224	6.16618	0.0108178	0.917	1
8430419L09Rik	139.313	142.713	156.291	153.949	126.019	126.295	-0.124844	7.14262	0.521699	0.47	1
8430427H17Rik	30.109	24.8205	45.9516	25.3832	24.2148	44.3699	-0.131366	5.00222	0.570373	0.45	1
8430429K09Rik	7.80995	10.944	5.4197	10.3884	10.8414	5.90874	0.146244	3.13372	0.334661	0.563	1
8430432A02Rik	1.85449	2.37663	1.20438	2.02838	1.81823	1.41375	-0.0442462	0.910594	0.0163754	0.898	1
9030025P20Rik	2.24649	2.66413	1.11173	2.21795	4.11227	0.906248	0.177617	1.242	0.222693	0.637	1
9030224M15Rik	2.44249	2.24247	1.85289	2.36961	1.41041	1.45	-0.332224	1.03069	0.867476	0.352	1
9030407P20Rik	2.81942	3.96744	3.61313	3.31745	4.01031	4.05999	0.111826	1.87715	0.135112	0.713	1
9030418K01Rik	8.06626	8.39487	11.9974	7.2036	7.52783	12.7237	-0.0972771	3.20532	0.177592	0.673	1
9030425E11Rik	14.1122	8.54821	12.0901	11.9807	14.291	19.9012	0.362338	3.74418	2.20739	0.137	1
9030612E09Rik	1.10063	0.919986	0.972766	0.853058	1.49537	2.06625	0.464057	0.332472	1.32757	0.249	1
9030617O03Rik	8.78997	6.32491	8.10638	5.68705	4.65604	6.88749	-0.460226	2.75681	2.94756	0.086	1
9030624J02Rik	117.014	103.498	141.097	90.1967	116.333	127.165	-0.131633	6.85038	0.640162	0.424	1
9030625A04Rik	16.0119	13.8765	14.9157	10.9002	9.58396	17.6537	-0.303384	3.7821	1.7433	0.187	1
9130011E15Rik	13.3583	10.5415	22.0494	9.19407	13.5773	17.9437	-0.163558	3.83393	0.49791	0.48	1
9130011J15Rik	136.373	158.276	133.917	138.101	174.16	146.885	0.0798971	7.21384	0.234185	0.628	1
9130019O22Rik	4.14621	3.27745	5.88292	2.93831	4.43513	6.37999	0.0130853	2.15649	0.00198473	0.964	1
9130020K20Rik	3.76928	2.68329	3.65945	2.25586	1.78425	8.01124	-0.104212	1.84483	0.07188	0.789	1
9130023H24Rik	9.63428	9.60236	15.24	7.10882	9.32907	16.4575	-0.134395	3.46678	0.347983	0.555	1
9130206I24Rik	0.753856	0.42166	0.8338	1.06158	0.611742	1.77625	0.672951	-0.127195	2.30468	0.129	1
9130213A22Rik	1.2514	1.22665	1.80657	1.06158	0.985585	1.19625	-0.386438	0.352252	1.10975	0.292	1
9130221H12Rik	0.844319	1.62914	2.82565	1.32698	0.934606	3.69749	0.0290594	0.845636	0.00553814	0.941	1
9130401M01Rik	58.2279	73.9056	53.7801	66.6523	67.6825	51.9099	-0.0192803	5.96798	0.0126282	0.911	1
9230110C19Rik	19.163	18.1697	17.6488	15.9427	21.8528	16.8925	-0.0265925	4.20118	0.0169161	0.897	1
9230112E08Rik	0.572931	0.536659	1.15805	0.30331	0.730692	1.05125	-0.130987	-0.468733	0.0825048	0.774	1
9230114K14Rik	9.19705	9.92818	4.81751	9.61112	8.76831	5.07499	-0.0304527	3.02252	0.0156057	0.901	1
9230116N13Rik	0.723702	1.22665	0.694833	1.6682	1.30845	0.906248	0.541198	0.227653	1.73384	0.188	1
9330020H09Rik	0.723702	0.90082	1.57495	0.644533	0.985585	2.2475	0.156172	0.199144	0.160523	0.689	1
9330101J02Rik	0.663394	0.766655	0.509544	0.511835	0.611742	1.16	0.0859257	-0.436981	0.0354867	0.851	1
9330104G04Rik	1.29663	1.80164	1.11173	1.57342	1.51236	1.885	0.207302	0.665929	0.318582	0.572	1
9330132A10Rik	4.10098	4.82993	4.49325	4.5686	5.72659	3.51624	0.0154682	2.21261	0.00270203	0.959	1
9330133O14Rik	5.473	7.34072	4.63222	6.97612	12.8806	4.78499	0.428819	2.8492	1.89527	0.169	1
9330136K24Rik	1.23632	0.919986	0.463222	0.682447	1.4274	0.724999	0.131059	0.00190093	0.0886015	0.766	1
9330151L19Rik	9.07643	9.44903	8.70857	7.88605	9.43103	14.9712	0.168798	3.30208	0.452567	0.501	1
9330159F19Rik	39.6679	50.1009	37.4747	46.1031	57.7927	35.4162	0.0955782	5.48869	0.259208	0.611	1
9330159M07Rik	1.40217	2.0508	1.15805	1.83881	2.54893	1.12375	0.225516	0.841086	0.37102	0.542	1
9330160F10Rik	2.84958	2.54913	1.76024	2.74874	2.19208	2.2475	0.00251242	1.30987	6.01e-05	0.994	1
9330162012Rik	5.68408	6.13324	5.97556	4.92878	5.42072	6.81499	-0.0863742	2.54831	0.107617	0.743	1
9330171B17Rik	0.497545	0.479159	0.880122	0.682447	1.03656	0.978748	0.596512	-0.346384	1.92329	0.165	1
9330179D12Rik	3.85974	4.2741	3.14991	3.33641	3.87437	2.64625	-0.211281	1.85764	0.515288	0.473	1
9330182L06Rik	8.57889	7.26406	16.0275	7.2036	7.42587	10.9837	-0.272852	3.24192	1.25196	0.263	1
9430008C03Rik	4.19144	4.02494	4.169	3.26058	4.9789	5.21999	0.0876742	2.11629	0.089026	0.765	1
9430015G10Rik	18.8766	19.8755	22.7442	15.8669	22.7874	24.5775	0.0144357	4.37329	0.00511505	0.943	1
9430016H08Rik	31.677	34.7103	21.6788	32.3973	35.8889	22.3662	0.0249309	4.91703	0.0203384	0.887	1
9430023L20Rik	79.8485	98.6685	59.663	89.6469	83.7407	67.6424	0.0133583	6.33443	0.00643152	0.936	1
9430031J16Rik	1.64341	1.95497	2.03818	1.25115	2.63389	2.03	0.0560699	0.976355	0.02212	0.882	1
9430037G07Rik	0.42216	0.862487	1.38967	0.909929	0.934606	1.55875	0.392644	0.00827667	0.852817	0.356	1
9430038I01Rik	8.42811	11.0973	5.97556	11.4689	10.2127	6.23499	0.108616	3.18999	0.19098	0.662	1
9430041J12Rik	4.35729	4.1591	3.70578	2.52126	3.16067	2.93624	-0.522195	1.82299	3.12744	0.077	1
9430065F17Rik	3.19635	2.93246	2.54772	4.03781	4.21422	2.32	0.248964	1.73302	0.639867	0.424	1
9430091E24Rik	0.99509	1.14998	0.602189	0.777231	1.22348	1.05125	0.135034	0.0505458	0.10817	0.742	1
9530026F06Rik	1.74895	2.1658	1.34334	3.31745	1.49537	1.41375	0.223943	1.01301	0.315421	0.574	1
9530026P05Rik	2.20126	2.66413	1.89921	2.72979	2.20907	1.84875	-0.00753704	1.23033	0.00052171	0.982	1
9530046B11Rik	1.07048	1.14998	0.231611	0.379137	0.611742	0.398749	-0.73145	-0.442645	2.22891	0.135	1
9530051G07Rik	1.02524	0.479159	0.8338	0.587662	0.730692	0.688749	-0.229651	-0.374483	0.26217	0.609	1
9530059O14Rik	12.5592	10.2157	7.9211	11.867	10.4166	13.2675	0.201648	3.47416	0.690881	0.406	1
9530068E07Rik	192.806	189.402	232.862	184.905	195.571	249.363	0.0105084	7.68999	0.00473545	0.945	1
9530077C05Rik	30.2598	29.8229	28.3492	30.1414	30.825	28.1662	-0.00536273	4.89501	0.000968936	0.975	1
9530080O11Rik	1.67356	1.49498	1.01909	0.890972	1.22348	0.869998	-0.495207	0.349951	1.74438	0.187	1
9530082P21Rik	1.43233	1.18832	2.31611	2.04734	1.37642	2.755	0.326774	0.882236	0.856095	0.355	1
9630013D21Rik	4.25175	4.58076	3.70578	5.74392	4.63905	3.55249	0.130473	2.17866	0.203083	0.652	1
9630028B13Rik	1.83941	2.2233	3.42784	2.33169	4.91093	4.56749	0.676862	1.68424	3.57575	0.0586	1
9630033F20Rik	19.2233	22.8847	31.916	17.8194	28.565	36.3949	0.134371	4.69226	0.411875	0.521	1
9830001H06Rik	24.3194	23.3447	37.1967	24.0562	28.3611	28.3475	-0.0542377	4.78268	0.0751556	0.784	1
9830144P21Rik	0.768933	0.306662	1.01909	0.227482	0.373843	1.63125	-0.338073	-0.529144	0.409652	0.522	1
9830147E19Rik	3.76928	3.54578	3.89106	1.9336	4.2822	5.18374	-0.0464528	1.9125	0.0180369	0.893	1
9930012K11Rik	1.19109	0.651657	0.694833	0.587662	0.832649	1.9575	0.17822	0.00485662	0.134923	0.713	1
9930013L23Rik	4.73422	4.54243	5.04912	4.79608	4.69002	10.7662	0.358078	2.50634	1.50437	0.22	1
9930014A18Rik	2.00526	1.14998	2.5014	1.55446	1.27446	3.44374	0.0281767	0.966177	0.00596223	0.938	1
9930021J03Rik	31.9786	37.9878	36.224	33.1934	34.2916	34.4374	-0.076909	5.1205	0.195373	0.658	1
9930104L06Rik	16.7205	13.6465	19.0384	12.0186	14.4609	20.3362	-0.119045	3.99325	0.331137	0.565	1
9930111J21Rik2	0.346774	0.153331	0.4169	0.208525	0.2379	1.45	0.470297	-1.14677	0.646724	0.421	1
A030009H04Rik	41.5676	51.8834	30.1558	47.5817	57.1129	33.7487	0.144238	5.46828	0.666626	0.414	1
A130010J15Rik	9.72475	7.07239	9.63502	8.05666	7.61279	7.82999	-0.17841	3.06496	0.502642	0.478	1
A130022J15Rik	13.3433	6.82323	13.665	13.4783	9.53298	21.2787	0.32652	3.684	1.38885	0.239	1
A130049A11Rik	1.40217	1.80164	1.57495	1.63029	1.44439	2.03	0.0570664	0.752658	0.026545	0.871	1
A230004M16Rik	0.346774	0.306662	0.8338	0.113741	0.152936	1.05125	-0.686152	-1.18183	1.65546	0.198	1
A230005M16Rik	1.34186	1.45664	2.73301	1.85777	1.41041	2.13875	0.0243614	0.861493	0.00468748	0.945	1
A230006K03Rik	1.34186	1.47581	0.602189	0.985756	0.543771	0.616249	-0.646591	0.0228612	2.22928	0.135	1
A230046K03Rik	44.8243	27.2738	42.1995	32.3404	34.7164	42.8837	-0.0773871	5.2181	0.152628	0.696	1
A230050P20Rik	38.2356	38.9844	47.0634	29.0419	30.3152	63.3649	-0.130488	5.34358	0.489505	0.484	1
A230051G13Rik	7.91549	7.11073	10.7931	5.83871	6.42329	9.89623	-0.255302	2.98754	1.12616	0.289	1
A230056P14Rik	6.3927	5.82658	6.6704	5.99036	7.66377	5.61874	0.0146507	2.68627	0.00295138	0.957	1
A230065N10Rik	0.603085	0.785822	0.880122	0.928886	0.526778	1.12375	0.142975	-0.26545	0.110316	0.74	1
A230072C01Rik	9.83029	9.71735	6.62407	9.21303	10.2127	9.38873	0.135962	3.21413	0.330632	0.565	1
A230107N01Rik	1.23632	1.72497	1.20438	1.08054	1.52936	1.05125	-0.19796	0.457506	0.273222	0.601	1
A2ld1	24.6813	21.8497	20.9376	19.8099	20.3574	15.805	-0.289939	4.37615	2.27871	0.131	1
A2m	28.3902	11.4807	28.0249	11.5637	16.704	42.7024	-0.146712	4.49622	0.218743	0.64	1
A330008L17Rik	2.17111	2.01247	1.71392	2.69187	2.05613	1.74	0.124798	1.10396	0.138244	0.71	1
A330009N23Rik	5.81977	5.74991	3.52049	5.09939	5.04687	3.29874	-0.1736	2.29285	0.407224	0.523	1
A330017A19Rik	9.33274	12.8415	5.32705	12.1703	8.51341	6.81499	0.0275962	3.23296	0.010711	0.918	1
A330021E22Rik	3.57328	4.06327	3.24255	2.59709	4.06129	8.80873	0.305462	2.11397	0.697383	0.404	1
A330023F24Rik	8.06626	8.06905	7.36523	6.27472	5.06387	13.2312	-0.0859485	2.98739	0.082194	0.774	1
A330033J07Rik	2.14095	1.62914	5.09544	1.34594	1.98816	4.78499	-0.167681	1.4414	0.26474	0.607	1
A330035P11Rik	0.738779	0.958319	1.99185	0.473921	0.747685	1.41375	-0.496046	0.0320644	1.54846	0.213	1
A330040F15Rik	1.3871	1.45664	0.972766	1.19428	0.934606	0.869998	-0.355279	0.275659	0.889892	0.346	1
A330048O09Rik	17.5649	16.3106	10.932	23.9425	16.0412	9.31623	0.0787143	4.00496	0.108271	0.742	1
A330050B17Rik	2.75911	2.31913	1.38967	2.16108	1.85222	2.03	-0.0928483	1.11983	0.0726406	0.788	1
A330050F15Rik	7.88534	7.35989	4.81751	8.4358	5.36974	5.36499	-0.0615728	2.74154	0.0486121	0.825	1
A330069E16Rik	1.7791	3.31578	1.15805	2.82457	2.58291	0.652499	-0.162101	1.1408	0.169485	0.681	1
A330076H08Rik	3.81451	2.70246	2.13082	3.35536	2.88878	3.58874	0.173531	1.65683	0.283571	0.594	1
A330102I10Rik	6.54347	5.99908	2.22347	4.26529	6.6442	3.40749	0.023542	2.32936	0.00603196	0.938	1
A430005L14Rik	55.6497	60.8724	38.2158	60.2069	52.9837	46.7624	0.0503972	5.72707	0.0899996	0.764	1
A430033K04Rik	18.6806	14.6814	18.9458	13.9143	21.5809	18.8862	0.0401301	4.15293	0.0324377	0.857	1
A430035B10Rik	2.78927	2.89412	1.94553	3.10892	3.29661	1.99375	0.120931	1.47671	0.150046	0.698	1
A430046D13Rik	5.62377	5.40492	3.70578	5.47853	6.49127	6.66999	0.328697	2.49528	1.40915	0.235	1
A430105I19Rik	5.62377	4.12077	7.0873	4.34112	4.07828	5.94499	-0.239749	2.3724	0.749033	0.387	1
A430107O13Rik	6.78471	2.52996	10.6541	7.01403	5.2168	21.3512	0.584031	3.10138	2.9849	0.084	1
A430110N23Rik	4.05575	1.05415	4.67854	2.5023	2.8378	5.50999	0.106425	1.75468	0.0643097	0.8	1
A4galt	5.03576	1.85914	4.67854	5.42166	4.94492	8.40999	0.658955	2.3278	3.50173	0.0613	1
A530013C23Rik	0.648316	1.11165	0.741155	1.0995	0.798664	0.688749	0.0425737	-0.133133	0.00975233	0.921	1
A530017D24Rik	1.96003	2.85579	1.71392	3.41223	3.41556	2.71875	0.538247	1.47163	2.7173	0.0993	1
A530054K11Rik	7.79487	7.39822	8.84754	6.42637	9.07418	6.12624	-0.166985	2.9422	0.380556	0.537	1
A530058N18Rik	1.79418	1.11165	0.694833	0.928886	0.815656	0.906248	-0.436714	0.169223	1.08811	0.297	1
A530083I20Rik	0.949859	0.843321	0.741155	0.549749	1.61432	0.434999	-0.0247764	-0.0903317	0.00252977	0.96	1
A630007B06Rik	43.6634	48.7593	44.7472	40.2833	49.3642	43.4637	-0.0624324	5.49838	0.134877	0.713	1
A630052C17Rik	5.78962	5.05992	4.40061	5.25105	6.49127	6.27124	0.222273	2.48838	0.678546	0.41	1
A630055G03Rik	6.16654	7.20656	4.81751	6.61594	5.6926	4.85749	-0.0929464	2.58952	0.121572	0.727	1
A730011L01Rik	17.5347	21.4472	29.4609	17.8005	21.0371	26.6075	-0.0711364	4.47055	0.131181	0.717	1
A730017C20Rik	62.0725	77.4897	55.494	64.131	78.286	49.3724	-0.0555691	6.02557	0.0979198	0.754	1
A730017L22Rik	5.00561	4.10161	6.16085	4.01885	5.19981	6.12624	-0.0078236	2.34893	0.000799685	0.977	1
A730036I17Rik	1.40217	0.574991	1.80657	1.25115	1.20649	1.84875	0.205889	0.434048	0.246088	0.62	1
A730081D07Rik	1.16094	0.824154	1.01909	0.492878	1.01957	0.761249	-0.413665	-0.105488	0.917687	0.338	1
A830005F24Rik	1.99018	2.20413	0.787477	1.9336	2.22606	0.688749	-0.059959	0.829661	0.0291088	0.865	1
A830007P12Rik	2.3068	0.728322	2.5014	1.06158	1.69928	6.63374	0.353077	1.24496	0.559065	0.455	1
A830010M20Rik	36.2605	32.4678	37.382	30.3499	37.5712	41.2524	0.0171791	5.16208	0.0100242	0.92	1
A830011K09Rik	1.62833	0.881653	0.555866	0.966799	1.22348	0.978748	0.0638899	0.171978	0.0226251	0.88	1
A830018L16Rik	21.2286	15.1989	18.8995	19.6393	14.8008	22.62	0.0170825	4.22546	0.00611924	0.938	1
A830036E02Rik	3.39235	6.4399	4.03003	3.31745	3.95933	5.00249	-0.215595	2.13788	0.416658	0.519	1
A830039N20Rik	4.29698	5.80741	3.47416	5.70601	4.9959	4.20499	0.127706	2.2831	0.198578	0.656	1
A830073O21Rik	2.29172	2.95162	2.73301	2.78666	3.05871	2.61	0.0734719	1.48515	0.0531353	0.818	1
A830080D01Rik	23.7766	19.358	22.6516	21.5918	23.4501	27.405	0.115298	4.52426	0.384682	0.535	1
A830082K12Rik	20.3541	25.0505	18.4826	18.9758	25.0984	16.9287	-0.0891989	4.39495	0.190747	0.662	1
A830093I24Rik	3.15112	2.26163	2.40875	2.44543	2.00516	1.84875	-0.323667	1.27932	0.951096	0.329	1
A930001N09Rik	43.7086	39.0994	48.0824	47.7713	48.6165	48.7562	0.137277	5.52507	0.666604	0.414	1
A930004D18Rik	9.10658	8.85487	8.94018	7.37421	8.88726	9.46123	-0.0883295	3.13869	0.139966	0.708	1
A930005H10Rik	7.93057	9.0657	2.77933	8.66328	6.04945	1.9575	-0.300092	2.66871	1.09374	0.296	1
A930006K02Rik	2.12587	3.54578	1.48231	3.08997	3.24563	2.03	0.231334	1.43748	0.457762	0.499	1
A930007I19Rik	1.23632	1.24581	0.741155	1.36489	1.24048	0.978748	0.149252	0.28411	0.161182	0.688	1
A930011G23Rik	0.512622	2.01247	1.57495	0.853058	3.29661	1.48625	0.434434	0.749211	0.56759	0.451	1
A930011O12Rik	22.1935	22.3097	24.5508	17.7815	16.1772	37.6274	-0.0763834	4.53148	0.12281	0.726	1
A930012L18Rik	0.829242	1.14998	0.694833	0.739317	1.20649	0.652499	-0.050877	-0.0691536	0.014797	0.903	1
A930017M01Rik	3.21143	1.36081	3.70578	1.11845	2.36201	3.95124	-0.251978	1.36344	0.381108	0.537	1
A930024E05Rik	2.39726	3.58411	2.45508	3.62076	4.5201	2.32	0.271063	1.70654	0.665205	0.415	1
A930029G22Rik	2.18618	3.90994	1.01909	3.35536	2.8378	1.19625	0.0691969	1.36713	0.0367963	0.848	1
A930038C07Rik	14.67	4.6766	9.35708	7.84814	10.6205	12.0712	0.0619382	3.30255	0.0313468	0.859	1
AA386476	1.96003	2.3958	1.06541	2.14212	1.75026	1.55875	0.0263791	0.935226	0.00561711	0.94	1
AA387200	3.15112	5.50075	2.96462	4.89087	8.19055	2.8275	0.373532	2.25002	1.15012	0.284	1
AA414768	3.42251	3.43078	2.73301	3.41223	4.18024	2.89999	0.114624	1.78307	0.148589	0.7	1
AA415398	3.73913	5.02159	5.23441	3.88615	4.53709	6.16249	0.0194988	2.25115	0.00469032	0.945	1
AA467197	0.859396	0.958319	0.648511	1.27011	0.747685	1.05125	0.294155	-0.0251399	0.498358	0.48	1
AA474408	1.47756	1.60998	4.169	2.82457	1.56334	3.91499	0.29439	1.33958	0.651378	0.42	1
AA543186	1.7791	1.74414	1.38967	1.59238	2.17508	1.48625	0.0839485	0.825606	0.059319	0.808	1
AA960436	18.3187	28.9029	23.7633	22.5207	30.0094	25.4112	0.113511	4.63974	0.264404	0.607	1
AA986860	1.73387	2.03164	3.98371	2.27482	1.97117	3.04499	-0.0244779	1.30883	0.00532909	0.942	1
AA987161	9.49859	9.56402	12.6923	6.12306	12.7276	11.6362	-0.0737098	3.37028	0.0696526	0.792	1
Aaas	70.8323	72.4489	49.4721	70.273	67.7165	50.8224	-0.0405223	6.0063	0.0655137	0.798	1
Aacs	87.372	75.1705	96.3502	68.074	69.5347	91.7123	-0.20095	6.3403	1.63972	0.2	1
Aadat	1.26648	0.728322	0.4169	0.549749	0.713699	0.507499	-0.430759	-0.353911	0.905195	0.341	1
Aagab	80.0143	77.3363	93.2466	66.2163	80.9709	103.167	-0.0349374	6.37504	0.0479578	0.827	1
Aak1	27.2293	22.0988	36.1776	21.1179	21.7508	27.8037	-0.276887	4.6945	2.23283	0.135	1
Aamp	324.219	406.308	335.79	347.1	336.05	355.503	-0.056085	8.4583	0.115153	0.734	1
Aard	48.5333	37.1253	33.2593	34.2929	33.6458	33.5674	-0.236132	5.20696	1.78665	0.181	1
Aars	189.58	153.772	212.295	162.574	153.343	182.265	-0.169029	7.45327	1.07472	0.3	1
Aars2	18.1378	14.9114	25.8015	15.5446	18.0294	23.49	-0.0463534	4.26055	0.0543666	0.816	1
Aarsd1	137.76	162.953	99.9633	157.133	139.868	92.0748	-0.0685221	7.05972	0.16975	0.68	1
Aasdh	12.3934	10.3498	14.6378	7.98083	9.43103	14.4637	-0.282134	3.51759	1.57895	0.209	1
Aasdhppt	67.832	62.6549	55.8182	61.3254	69.0759	57.0574	-0.00766634	5.96911	0.00231512	0.962	1
Aass	7.87026	3.89078	6.16085	4.68234	3.68745	8.98998	-0.165538	2.54289	0.242019	0.623	1
Aatf	48.1111	50.8101	40.8562	41.0037	49.6701	41.6149	-0.0944822	5.51111	0.32255	0.57	1
Aatk	30.9835	23.7088	49.5184	17.1559	22.1757	47.8499	-0.351932	4.96636	3.41899	0.0645	1
AB041803	2.06557	1.85914	2.13082	3.62076	1.00258	3.00874	0.311325	1.21111	0.491339	0.483	1
AB124611	1.20617	0.919986	0.741155	0.758274	0.679714	0.543749	-0.540363	-0.184521	1.79259	0.181	1
Abat	117.451	69.5548	155.55	90.1209	75.5162	122.815	-0.243041	6.70295	1.43077	0.232	1
Abca1	74.1493	78.2372	92.737	79.7325	83.9446	82.3961	-0.00524127	6.35607	0.00101198	0.975	1
Abca2	31.5866	27.0246	58.088	26.4448	24.3677	43.9712	-0.286899	5.11974	2.63023	0.105	1
Abca3	46.5732	35.132	66.426	33.7621	33.8667	56.2962	-0.277389	5.48659	2.58555	0.108	1
Abca5	15.0922	13.589	14.7768	10.7296	11.1643	20.0462	-0.135685	3.82003	0.359054	0.549	1
Abca6	9.25736	6.86156	11.1636	7.37421	7.39189	10.2225	-0.142141	3.11638	0.340824	0.559	1
Abca7	3.3622	3.08579	6.34614	2.86248	3.26263	7.46749	0.0102645	2.09964	0.00134304	0.971	1
Abca8a	21.2437	21.888	27.7007	20.9663	17.8935	22.2212	-0.221009	4.45789	1.3077	0.253	1
Abca8b	7.10133	5.99908	5.8366	6.61594	5.67561	7.82999	0.0579492	2.71118	0.0483383	0.826	1
Abca9	9.61921	4.31244	10.0519	4.68234	4.87695	12.9775	-0.256308	2.92392	0.630946	0.427	1
Abcb10	30.6669	26.8521	51.0471	25.8571	29.5166	52.7437	-0.0387745	5.15181	0.0527982	0.818	1
Abcb1a	11.7149	2.2233	5.97556	15.7531	7.66377	12.4337	0.845991	3.22697	3.32894	0.0681	1
Abcb1b	2.33695	1.9933	2.77933	1.97151	1.93718	2.57375	-0.150938	1.19161	0.223209	0.637	1
Abcb4	4.83976	3.00912	5.97556	2.72979	3.73843	5.29249	-0.262187	2.07985	0.733158	0.392	1
Abcb6	15.9516	12.9565	16.1201	10.7106	10.0598	17.9075	-0.286992	3.79276	1.66827	0.196	1
Abcb7	15.7104	14.5281	16.9539	14.6347	18.7431	19.72	0.149101	4.06194	0.540333	0.462	1
Abcb8	59.0571	61.2941	76.8485	55.5436	56.6371	67.7874	-0.145339	5.97019	0.821471	0.365	1
Abcb9	116.38	169.392	152.91	139.484	144.218	151.633	-0.0312662	7.18828	0.0300609	0.862	1
Abcc1	18.1529	15.7739	29.2293	16.6252	13.5603	23.49	-0.232118	4.26882	1.31586	0.251	1
Abcc10	5.69915	5.13659	10.9784	4.07572	5.50568	11.3462	-0.121624	2.7976	0.224087	0.636	1
Abcc3	1.82433	1.32248	0.648511	1.63029	0.526778	0.724999	-0.352531	0.27961	0.535665	0.464	1
Abcc4	13.3433	5.99908	14.2209	8.64432	7.52783	20.1187	-0.0200364	3.51151	0.00453279	0.946	1
Abcc5	47.2065	46.996	47.8045	40.7193	41.1567	59.7761	-0.0469639	5.55656	0.0774632	0.781	1
Abcc6	0.768933	0.172497	0.555866	0.66349	0.441814	1.3775	0.548908	-0.560594	0.94266	0.332	1
Abcc8	7.20687	8.01155	9.40341	7.39317	12.5917	10.9112	0.314648	3.21169	1.41093	0.235	1
Abcd1	29.2195	24.2263	36.224	30.331	22.8044	31.3924	-0.08748	4.85651	0.197608	0.657	1
Abcd2	63.2033	54.7583	80.5543	43.2974	70.2824	72.5361	-0.106909	5.99372	0.304447	0.581	1
Abcd3	117.375	75.573	123.541	81.8557	94.973	112.266	-0.14584	6.64974	0.626885	0.429	1
Abcd4	28.1792	26.0279	30.7579	23.2221	26.016	23.9975	-0.227109	4.72445	1.5535	0.213	1
Abce1	103.987	63.1532	101.724	65.9319	78.422	104.799	-0.142799	6.4212	0.547577	0.459	1
Abcf1	126.693	137.116	119.65	139.39	138.101	114.006	0.00802882	7.02226	0.00253892	0.96	1
Abcf2	135.905	110.628	121.179	105.135	113.393	121.655	-0.13122	6.88236	0.686666	0.407	1
Abcf3	104.108	85.1946	94.2657	76.3582	85.9328	96.8961	-0.152595	6.4973	0.898993	0.343	1
Abcg1	10.6897	10.8865	17.0466	10.976	12.6767	20.9162	0.167881	3.7742	0.646436	0.421	1
Abcg2	50.6441	17.1347	21.6325	49.9513	28.6159	47.3787	0.508763	5.16729	2.22048	0.136	1
Abcg4	21.6357	18.2081	32.2402	17.8384	17.8595	28.4562	-0.182026	4.49004	0.957516	0.328	1
Abhd10	47.5382	52.0559	45.1178	54.2924	52.7798	52.7799	0.12711	5.67128	0.61119	0.434	1
Abhd11	50.7195	62.9999	40.8562	61.8183	57.4698	46.7624	0.0925194	5.75443	0.292921	0.588	1
Abhd12	214.08	210.888	207.246	206.781	192.665	180.778	-0.141928	7.66481	0.80532	0.37	1
Abhd13	27.5308	25.0888	37.3357	26.7671	29.0917	36.5762	0.0309407	4.9178	0.0314254	0.859	1
Abhd14a	59.9768	76.9722	55.8182	77.4577	69.4837	48.3937	-0.0168999	6.03258	0.00851366	0.926	1
Abhd14b	20.324	20.5655	19.6406	21.971	21.6149	31.6824	0.269952	4.49446	1.96617	0.161	1
Abhd15	1.96003	1.41831	3.19623	1.9336	1.61432	3.08124	0.0142606	1.11959	0.0018236	0.966	1
Abhd16a	97.8355	120.422	118.214	108.016	117.896	125.642	0.0429133	6.841	0.0690953	0.793	1
Abhd2	13.3131	8.08821	19.6406	14.3124	13.7302	23.0912	0.323349	3.92125	1.91589	0.166	1
Abhd4	346.623	312.776	425.655	266.363	284.834	348.217	-0.286441	8.36375	3.36689	0.0665	1
Abhd5	17.1728	15.7931	18.9921	14.4072	16.1092	21.7137	-0.0292225	4.11175	0.0221552	0.882	1
Abhd6	95.6191	90.6953	71.8457	104.357	76.8586	67.7511	-0.069166	6.41571	0.155606	0.693	1
Abhd8	106.595	136.675	141.978	103.391	122.23	155.44	-0.0496891	6.98988	0.0863498	0.769	1
Abi1	108.736	90.6186	112.609	89.3436	107.82	121.619	0.00832485	6.71081	0.00266751	0.959	1
Abi2	90.9302	72.5639	143.46	67.5053	91.8973	153.917	-0.00928108	6.6681	0.00290398	0.957	1
Abl1	36.8636	35.0553	77.6823	33.1934	34.4785	63.4011	-0.173555	5.52428	1.07598	0.3	1
Abl2	11.2928	15.5248	16.3517	16.6062	16.585	15.0075	0.149732	3.9364	0.422494	0.516	1
Ablim1	33.622	17.7864	31.4991	34.4256	24.7076	38.9687	0.225457	4.9083	0.895938	0.344	1
Ablim2	43.7991	43.2777	38.818	31.8096	34.7674	48.9012	-0.168702	5.32581	0.868005	0.352	1
Ablim3	13.2226	14.3173	17.4635	10.1988	15.7014	21.0612	0.00879847	3.92535	0.0015244	0.969	1
Abr	147.424	97.1927	189.689	107.03	96.4344	189.116	-0.192943	7.08742	1.13509	0.287	1
Abt1	38.7784	52.535	33.7689	46.9561	50.4178	36.2137	0.0763349	5.44575	0.178313	0.673	1
Abtb1	22.6458	26.4304	24.8287	23.4307	27.3925	29.6524	0.0988513	4.68588	0.290871	0.59	1
Abtb2	26.973	20.0097	52.6683	21.1369	19.1509	41.2887	-0.280231	4.88976	2.20353	0.138	1
AC163349.1	1.23632	0.958319	0.0463222	1.25115	0.696707	0.10875	-0.0326899	-0.233838	0.0042648	0.948	1
AC188461.4	0.753856	0.440827	1.06541	0.606619	0.645728	0.289999	-0.481481	-0.569944	0.852003	0.356	1
Acaa1a	127.568	132.114	115.296	122.461	120.921	115.239	-0.0803258	6.94002	0.273606	0.601	1
Acaa2	146.308	123.546	122.198	122.859	105.067	131.044	-0.144683	6.96883	0.77406	0.379	1
Acaca	18.5901	23.0188	24.0412	22.2174	19.8306	15.9862	-0.197304	4.37739	0.794312	0.373	1
Acacb	4.93022	3.08579	5.74395	3.20371	4.2822	8.44624	0.0982684	2.28171	0.103577	0.748	1
Acad10	5.17145	3.10495	5.51234	3.67763	4.41814	5.18374	-0.0658875	2.17429	0.0478003	0.827	1
Acad12	10.4032	5.46242	8.01374	4.87191	4.0273	7.46749	-0.60816	2.74425	3.88745	0.0486	1
Acad8	84.5073	78.1988	73.5597	71.619	79.5095	86.2748	-0.0131603	6.30323	0.00692893	0.934	1
Acad9	89.0003	71.4714	82.3609	76.1497	80.3422	74.8199	-0.0862728	6.30769	0.276278	0.599	1
Acadl	227.951	172.881	187.512	168.09	159.665	162.69	-0.277308	7.49389	2.83313	0.0923	1
Acadm	140.474	120.116	126.969	115.239	112.17	115.13	-0.19439	6.93008	1.5453	0.214	1
Acads	34.1949	33.752	64.4342	26.4258	28.9388	59.5949	-0.252848	5.33993	2.40192	0.121	1
Acadsb	143.112	95.0652	143.552	86.4622	105.509	137.351	-0.245502	6.87921	1.83109	0.176	1
Acadvl	88.4274	77.3172	97.8788	73.2872	78.405	105.814	-0.06541	6.43249	0.174529	0.676	1
Acan	1.02524	0.881653	1.48231	0.625576	0.645728	1.99375	-0.268235	0.121943	0.459943	0.498	1
Acap2	52.7096	43.776	50.3986	41.7619	41.9553	51.6199	-0.142197	5.5535	0.739667	0.39	1
Acap3	46.2566	45.8268	69.9465	33.9896	50.5027	73.0436	-0.0826478	5.71713	0.210092	0.647	1
Acat1	391.191	383.193	297.852	370.284	394.863	299.424	-0.0270021	8.48718	0.0306659	0.861	1
Acat2	137.669	146.661	121.874	155.674	146.784	120.749	0.037982	7.12159	0.0572028	0.811	1
Acat3	8.71458	6.24824	7.68948	7.14673	5.4717	5.43749	-0.339007	2.77932	1.51244	0.219	1
Acbd3	56.2528	44.121	59.8946	43.5628	48.4296	55.7162	-0.135328	5.67755	0.643704	0.422	1
Acbd4	17.0522	19.1089	17.3245	16.0565	17.6895	24.1425	0.0704136	4.21055	0.120321	0.729	1
Acbd5	88.7892	63.8049	112.656	53.591	77.3004	103.602	-0.206309	6.36484	1.2194	0.269	1
Acbd6	54.5943	67.274	47.8045	64.0173	65.2695	44.6237	0.00666595	5.85568	0.00148027	0.969	1
Acbd7	2.60834	1.9933	0.648511	2.00943	1.75026	1.12375	-0.0229326	0.86418	0.00377253	0.951	1
Accn1	21.6055	20.048	23.0221	14.9759	14.9027	22.475	-0.350488	4.28011	3.2859	0.0699	1
Accn2	9.84536	18.3614	21.1692	10.1609	27.6474	22.1487	0.276321	4.18049	0.673373	0.412	1
Accn4	1.79418	2.12747	1.62128	1.25115	0.611742	2.3925	-0.566916	0.721454	1.61738	0.203	1
Accs	8.42811	9.50652	11.2563	7.24152	10.2637	7.68499	-0.219655	3.1885	0.706235	0.401	1
Acd	61.0322	89.9095	52.7147	72.0739	82.7212	57.2749	0.0431442	6.13003	0.0538552	0.816	1
Ace2	1.82433	0.517492	2.22347	1.44072	0.764678	4.09624	0.221706	0.799089	0.20951	0.647	1
Acer2	6.12131	1.36081	2.77933	5.06148	4.45212	9.31623	0.785851	2.26898	2.81486	0.0934	1
Acer3	11.8355	10.0049	10.0982	12.6442	11.4532	14.7537	0.257222	3.56376	1.32739	0.249	1
Ache	10.8405	11.059	11.7658	9.57321	10.8754	10.3675	-0.142614	3.43327	0.405519	0.524	1
Acin1	56.3583	60.4891	93.015	73.2682	56.943	102.515	0.134924	6.19059	0.615132	0.433	1
Acly	168.396	132.344	221.744	135.655	176.284	215.723	0.00387092	7.43947	0.000507174	0.982	1
Acn9	12.0768	15.2564	9.44973	12.2461	17.2137	9.85998	0.074288	3.68908	0.101268	0.75	1
Aco1	81.5371	53.34	84.399	57.7236	57.3169	78.1186	-0.205236	6.0951	1.27299	0.259	1
Aco2	423.773	330.908	424.96	322.949	348.523	399.221	-0.159081	8.54725	0.961416	0.327	1
Acot1	68.9477	84.5429	58.9218	73.6663	57.096	51.4749	-0.235667	6.05406	1.71834	0.19	1
Acot13	132.422	134.797	68.7421	162.252	121.295	76.5236	0.0933854	6.88292	0.297347	0.586	1
Acot2	24.6662	20.6614	20.4281	20.8146	21.8698	12.9775	-0.283919	4.35757	1.79157	0.181	1
Acot3	5.865	7.66655	3.24255	5.36479	5.99847	5.54624	0.0469508	2.52126	0.0248472	0.875	1
Acot4	0.693548	0.785822	1.06541	0.454964	0.509785	0.761249	-0.586894	-0.451691	2.04159	0.153	1
Acot5	3.3622	3.92911	1.62128	3.98094	3.89136	3.04499	0.328638	1.77931	1.1101	0.292	1
Acot6	7.16164	5.04076	10.932	4.58756	6.57623	9.24373	-0.183681	2.83986	0.457131	0.499	1
Acot7	94.0964	114.883	72.031	100.718	100.224	64.9236	-0.10552	6.52837	0.404363	0.525	1
Acot8	13.102	13.5698	12.4607	13.4025	12.1329	11.7087	-0.0867681	3.68263	0.163128	0.686	1
Acot9	19.7812	21.0064	14.6841	20.8336	24.7076	19.575	0.223347	4.34288	1.3617	0.243	1
Acox3	17.203	13.3206	23.7633	13.0044	14.1211	19.9737	-0.213091	4.06651	1.07659	0.299	1
Acp1	92.1212	109.095	66.565	90.3863	103.469	71.5574	-0.0210451	6.48861	0.016777	0.897	1
Acp2	64.0326	55.8892	82.3609	54.2735	61.5481	80.5836	-0.061548	6.04422	0.146908	0.702	1
Acpl2	16.6904	18.1889	25.0603	14.7863	24.3677	26.245	0.112684	4.37487	0.263957	0.607	1
Acrbp	1.56802	1.43748	0.880122	1.04263	1.05356	1.99375	-0.0282566	0.457555	0.00461506	0.946	1
Acsf2	34.7377	27.3888	66.6113	25.8761	24.5547	61.7699	-0.253023	5.29632	2.17618	0.14	1
Acsf3	21.5151	16.2531	30.619	17.9142	16.3301	20.735	-0.294318	4.35472	1.92852	0.165	1
Acsl1	20.7461	16.0614	25.6625	17.3645	16.8059	33.4587	0.0384023	4.41814	0.0375976	0.846	1
Acsl4	14.8208	8.10738	13.3408	9.02346	10.3996	14.7175	-0.129663	3.54466	0.25174	0.616	1
Acsl5	20.8366	16.8856	18.8531	16.8716	15.3615	25.4112	-0.0274531	4.24345	0.0172948	0.895	1
Acss2	67.0932	53.7617	83.6579	67.221	50.9955	69.4186	-0.124228	6.02631	0.446589	0.504	1
Acss3	1.23632	0.536659	0.972766	0.398094	0.815656	2.8275	0.103644	0.140779	0.0363642	0.849	1
Acta1	5.20161	4.79159	3.01094	5.6681	4.72401	2.28375	-0.0871448	2.1538	0.0875789	0.767	1
Actb	2061.18	2189.28	1497.13	3377.45	2830.7	1133.97	0.218029	11.1195	0.952711	0.329	1
Actg1	338.18	349.384	471.56	313.584	363.783	392.696	-0.121199	8.53254	0.542846	0.461	1
Actl6a	109.716	116.263	97.6472	108.206	111.966	94.8661	-0.0568241	6.74259	0.133793	0.715	1
Actl6b	36.3359	54.6242	35.4828	45.9514	64.3689	40.1649	0.223662	5.54278	1.17108	0.279	1
Actn1	19.2083	11.6148	32.5182	17.9332	12.1499	50.6049	0.176698	4.53924	0.521816	0.47	1
Actn2	10.8555	4.5041	6.2535	4.58756	4.5201	6.16249	-0.529126	2.6303	2.45751	0.117	1
Actn3	0.527699	1.09248	1.11173	0.492878	0.628735	0.906248	-0.467876	-0.303603	1.09416	0.296	1
Actn4	193.816	109.689	202.938	154.309	126.665	326.793	0.141448	7.50957	0.397213	0.529	1
Actr10	167.552	183.748	146.286	166.896	205.375	149.168	0.0455683	7.41756	0.0787007	0.779	1
Actr1a	213.537	254.53	332.593	190.327	277.782	324.836	-0.033111	8.04244	0.0335625	0.855	1
Actr1b	113.425	124.946	125.672	109.172	110.386	131.007	-0.077611	6.89448	0.249711	0.617	1
Actr2	85.2461	72.3339	159.487	60.7188	95.6867	173.927	0.0142476	6.72348	0.00595686	0.938	1
Actr3	159.968	137.27	153.836	136.982	181.755	167.293	0.0886842	7.28649	0.28356	0.594	1
Actr3b	68.2843	64.9932	60.3578	66.1973	61.633	56.4049	-0.0886781	5.98504	0.304711	0.581	1
Actr5	14.67	15.2948	14.0819	14.4262	13.7302	16.675	0.0016845	3.89276	6.72e-05	0.993	1
Actr6	62.7962	59.3966	40.4856	56.6431	71.0981	43.3912	0.0576758	5.8143	0.121456	0.727	1
Actr8	73.0034	75.918	69.4833	70.747	77.4704	71.4849	-0.00919256	6.19518	0.00342421	0.953	1
Acvr1	19.8264	15.4673	24.4118	15.5067	15.5654	22.4025	-0.179987	4.22804	0.832746	0.361	1
Acvr1b	1.16094	1.62914	3.19623	2.93831	1.64831	3.18999	0.468306	1.18425	1.47879	0.224	1
Acvr1c	8.57889	5.32825	9.07915	4.72026	4.0443	10.8025	-0.378877	2.80344	1.64491	0.2	1
Acvr2a	18.575	15.1798	26.8206	13.4973	19.8816	34.2199	0.0863198	4.39164	0.170365	0.68	1
Acvr2b	14.6399	22.9038	16.5833	19.7909	21.9208	18.7775	0.141196	4.26744	0.407826	0.523	1
Acy1	56.7955	59.7991	41.7826	55.1076	47.0872	37.5187	-0.194591	5.65105	1.34567	0.246	1
Acy3	5.39761	4.71493	5.14176	5.09939	4.9959	4.02374	-0.126019	2.31542	0.204482	0.651	1
Acyp1	36.1248	41.5335	19.1311	47.8092	44.9291	23.2	0.247196	5.17704	2.04394	0.153	1
Acyp2	35.8534	37.8153	21.4472	48.0935	38.6247	24.07	0.198664	5.12697	1.21193	0.271	1
Ada	4.25175	3.25828	2.64037	3.75346	3.14368	2.755	-0.0789815	1.76628	0.0671704	0.796	1
Adal	32.0238	28.1171	30.8969	24.0562	32.5753	32.7337	-0.0495075	4.90938	0.0727407	0.787	1
Adam10	60.1125	42.741	74.8103	39.9042	52.0151	72.2461	-0.142555	5.81739	0.609551	0.435	1
Adam11	25.9176	24.3413	30.9432	23.2411	24.4527	42.4124	0.081596	4.8198	0.204599	0.651	1
Adam12	2.3068	1.74414	4.40061	2.16108	3.00773	5.47374	0.320115	1.63464	1.03729	0.308	1
Adam15	35.582	29.6312	44.9325	32.4731	28.8029	57.6374	0.0430459	5.23591	0.0595247	0.807	1
Adam17	34.1045	21.6005	44.4693	25.1178	29.8904	42.1587	-0.0538023	5.02409	0.071847	0.789	1
Adam19	0.980013	1.11165	1.80657	0.777231	1.44439	1.9575	0.0786167	0.422141	0.0414431	0.839	1
Adam1a	0.150771	0.440827	0.602189	0.0568705	0.169928	1.12375	-0.559034	-1.32056	0.667779	0.414	1
Adam22	52.7699	43.2394	83.6116	46.1789	56.0594	76.4511	6.33e-05	5.88447	1.24e-07	1	1
Adam23	49.6339	50.8867	84.0285	56.4914	49.6531	66.8811	-0.0727595	5.88885	0.165944	0.684	1
Adam5	1.17602	0.498326	0.787477	0.530792	0.203914	0.942498	-0.739998	-0.47391	1.77779	0.182	1
Adam8	1.80926	2.4533	1.71392	1.27011	1.00258	3.84249	-0.266082	1.00016	0.357439	0.55	1
Adam9	35.974	24.4946	46.0443	27.8476	28.7179	58.2174	0.0321143	5.18099	0.0288139	0.865	1
Adamts1	11.8355	16.6173	21.7714	17.554	17.3157	34.2199	0.39316	4.29092	3.51281	0.0609	1
Adamts10	6.70932	5.94158	9.12547	6.88134	6.61022	16.5662	0.328045	3.08017	1.67969	0.195	1
Adamts15	1.9148	1.03498	3.24255	1.32698	0.509785	6.59749	-0.122539	1.19002	0.0664775	0.797	1
Adamts17	3.96528	4.35077	4.5859	4.90982	4.16325	5.07499	0.117571	2.18536	0.175958	0.675	1
Adamts18	1.23632	2.3958	3.28888	0.985756	6.04945	2.86375	0.550548	1.50257	0.966947	0.325	1
Adamts2	7.32748	3.39245	6.57775	4.62547	6.35532	15.37	0.407347	2.82715	1.40469	0.236	1
Adamts20	9.61921	9.10403	6.85569	6.82447	7.10301	10.005	-0.132671	3.05137	0.253767	0.614	1
Adamts3	4.01052	3.37328	5.04912	3.16579	4.16325	5.00249	-0.0286907	2.04367	0.00990173	0.921	1
Adamts4	3.45266	3.14329	5.23441	3.07101	5.96449	6.41624	0.381316	2.17565	1.44635	0.229	1
Adamts6	0.618162	0.536659	1.20438	0.30331	0.509785	1.12375	-0.386023	-0.508124	0.804759	0.37	1
Adamts8	1.14586	0.843321	1.43599	1.15637	0.594749	2.35625	0.092148	0.309325	0.0475113	0.827	1
Adamts9	3.06066	2.14663	4.77119	2.54022	2.26005	5.25624	-0.0491334	1.70983	0.0254811	0.873	1
Adamtsl1	1.19109	0.804988	1.38967	2.0663	0.968592	3.44374	0.815507	0.701499	3.8541	0.0496	1
Adamtsl2	10.8405	8.47154	7.87477	10.9381	5.4547	8.91748	-0.112419	3.14363	0.142842	0.705	1
Adamtsl3	1.10063	0.68999	2.31611	1.02367	0.781671	2.50125	0.0252395	0.42946	0.00441693	0.947	1
Adamtsl4	7.7798	4.08244	9.91295	3.50702	7.10301	13.34	0.0149622	2.89507	0.0020478	0.964	1
Adap1	28.0585	30.1679	30.5727	22.4639	25.5912	27.7312	-0.250574	4.77886	2.01894	0.155	1
Adar	38.7633	30.5704	52.9463	29.857	34.1046	44.4787	-0.177861	5.25402	1.02144	0.312	1
Adarb1	17.4292	16.3489	20.984	16.8906	16.721	23.925	0.0405363	4.21869	0.045263	0.832	1
Adarb2	12.0014	9.50652	10.6541	9.85756	8.36048	13.4487	-0.0674879	3.40898	0.0795647	0.778	1
Adat1	11.4737	11.0015	10.1446	10.3315	11.4872	9.53373	-0.0737022	3.42919	0.109228	0.741	1
Adat2	2.36711	3.02829	1.94553	3.43119	3.61948	1.55875	0.170954	1.47868	0.257069	0.612	1
Adat3	2.38219	3.50745	3.01094	3.54493	3.14368	3.84249	0.22123	1.71469	0.493526	0.482	1
Adc	16.0873	18.8981	22.4199	18.028	18.6072	22.4025	0.0266693	4.27552	0.0186098	0.891	1
Adck1	37.6777	38.4094	38.1232	34.9564	40.1201	40.3462	-0.00422541	5.26025	0.000652305	0.98	1
Adck2	26.5207	24.4946	32.6108	23.5065	24.9115	29.9787	-0.107349	4.75076	0.372529	0.542	1
Adck3	51.9105	47.9159	55.7719	38.8426	44.0115	49.4449	-0.255144	5.58246	2.47485	0.116	1
Adck4	25.7065	30.9345	32.6571	26.7102	27.3585	33.3499	-0.0532352	4.87823	0.0890076	0.765	1
Adck5	26.0684	29.2671	21.8178	23.6013	23.1612	28.3837	-0.0579284	4.6698	0.0916362	0.762	1
Adcy1	145.283	150.744	163.656	150.498	137.047	178.966	-0.00224493	7.26676	0.000206794	0.989	1
Adcy2	146.927	112.2	131.184	120.603	91.7444	111.324	-0.284103	6.89734	2.53805	0.111	1
Adcy3	18.6203	9.62152	32.0086	9.72486	10.2127	25.2662	-0.463419	4.10068	3.59296	0.058	1
Adcy4	2.68373	0.344995	1.89921	2.67292	1.61432	4.67624	0.75299	1.19717	1.81087	0.178	1
Adcy5	9.19705	10.8482	14.2209	10.9002	8.34349	21.9312	0.150132	3.62733	0.388989	0.533	1
Adcy6	5.72931	7.76238	9.1718	8.45475	6.04945	10.9112	0.136354	2.99518	0.260267	0.61	1
Adcy7	1.61325	0.881653	2.26979	1.87673	1.03656	2.13875	0.109825	0.708278	0.0738138	0.786	1
Adcy8	9.92075	4.36993	13.7577	5.85767	3.92535	9.53373	-0.551888	2.9559	2.92823	0.087	1
Adcy9	10.1318	10.1965	14.7768	10.7864	7.91866	16.3125	-0.0488526	3.53217	0.0444348	0.833	1
Adcyap1	1.2514	1.11165	1.29702	1.27011	0.696707	1.41375	-0.157531	0.268609	0.15532	0.694	1
Add1	299.07	257.27	388.134	258.515	278.819	344.628	-0.10776	8.24192	0.454282	0.5	1
Add2	44.764	52.6692	54.0117	73.818	68.2093	46.3274	0.275952	5.8377	1.77165	0.183	1
Add3	265.222	155.765	315.639	190.877	161.432	307.073	-0.197464	7.84507	0.981353	0.322	1
Adh5	412.329	436.169	290.44	423.515	461.814	258.027	-0.0342541	8.58964	0.0441689	0.834	1
Adhfe1	91.9705	66.4498	103.993	67.7518	73.8169	77.3211	-0.266007	6.32283	2.22243	0.136	1
Adi1	108.405	112.181	95.6553	107.296	116.197	93.1261	-0.0181793	6.72983	0.0135523	0.907	1
Adipor1	106.867	116.627	120.391	102.557	109.638	129.775	-0.0327299	6.83391	0.0444688	0.833	1
Adipor2	24.8773	32.1995	28.8587	55.9417	29.9754	29.7974	0.397991	5.08863	2.42779	0.119	1
Adk	464.21	386.298	336.762	373.696	360.979	300.004	-0.212529	8.54236	1.78593	0.181	1
Adnp2	17.7458	14.0873	28.1176	13.4214	16.4491	28.7099	-0.0692072	4.2807	0.121952	0.727	1
Ado	30.9533	33.4262	62.0717	25.023	40.5279	77.9011	0.104742	5.45901	0.286501	0.592	1
Adora1	85.9698	77.0872	107.653	75.2397	69.3818	94.6848	-0.193233	6.40289	1.48162	0.224	1
Adora2a	0.527699	0.229997	2.13082	0.379137	0.560764	3.80624	0.474926	0.181777	1.18964	0.275	1
Adora2b	13.7654	10.0049	15.5643	10.9381	8.71733	15.9137	-0.187872	3.63133	0.651388	0.42	1
Adpgk	31.6017	27.2929	38.3085	25.9898	26.084	38.3524	-0.135024	4.95718	0.617489	0.432	1
Adprh	224.317	267.294	214.194	253.245	246.77	195.423	-0.0460014	7.87851	0.0772939	0.781	1
Adprhl1	0.557854	1.01582	0.880122	1.36489	0.730692	1.05125	0.356638	-0.032547	0.628579	0.428	1
Adprhl2	67.7265	87.4562	74.1155	74.1023	73.8849	74.8199	-0.0602205	6.24032	0.126811	0.722	1
Adra1a	1.7791	0.555825	2.9183	0.796188	1.32544	3.29874	-0.0520588	0.769382	0.0137963	0.906	1
Adra1b	0.482468	0.0574991	1.06541	0.473921	0.135943	0.724999	-0.0954816	-1.07853	0.0183517	0.892	1
Adra1d	1.04032	0.766655	2.22347	1.25115	0.968592	2.8275	0.29397	0.547698	0.653002	0.419	1
Adra2a	10.7349	6.6699	15.9348	6.06619	8.27551	29.7612	0.0942134	3.63533	0.108548	0.742	1
Adra2c	19.6304	37.4128	27.8396	21.08	39.6103	25.665	-0.00450961	4.84401	0.000267872	0.987	1
Adrb1	7.7798	8.35654	15.6569	6.78655	6.45728	15.4425	-0.214406	3.30278	0.878381	0.349	1
Adrb2	4.25175	1.76331	3.38152	3.29849	2.39599	4.78499	0.0963294	1.7281	0.0667358	0.796	1
Adrbk1	58.6199	59.3391	89.3555	48.6812	59.5769	95.9536	-0.0677686	6.08188	0.175746	0.675	1
Adrbk2	22.6911	17.4222	32.3792	13.1561	18.947	25.9912	-0.338385	4.42777	2.64535	0.104	1
Adrm1	114.3	141.735	100.519	126.613	109.978	110.744	-0.0477139	6.88314	0.0800852	0.777	1
Adsl	111.646	105.473	105.059	101.95	104.03	102.914	-0.0778409	6.72019	0.257015	0.612	1
Adss	77.6472	75.228	84.7696	74.9933	100.7	96.5698	0.177037	6.40697	1.12552	0.289	1
Adssl1	9.87552	8.45237	8.43064	6.42637	5.9305	9.02623	-0.369037	3.00725	2.12303	0.145	1
Aebp1	82.306	31.3945	91.6253	62.823	58.3024	165.698	0.333604	6.32024	1.41638	0.234	1
Aebp2	39.8941	29.7654	52.1588	30.4637	30.842	55.8974	-0.10616	5.29738	0.366431	0.545	1
Aen	32.7324	34.9978	31.777	30.6532	29.2447	33.3499	-0.113524	5.00919	0.437757	0.508	1
Aes	394.222	552.509	365.065	388.085	508.409	412.271	-0.0162431	8.77818	0.00767523	0.93	1
AF251705	1.26648	0.939153	0.972766	0.928886	1.27446	1.41375	0.14287	0.238598	0.137777	0.711	1
Afap1	49.7696	75.4197	93.7561	63.259	95.1089	105.27	0.258703	6.31909	1.51144	0.219	1
Afap1l1	15.2731	10.5032	9.86663	14.7484	15.4975	15.225	0.34244	3.76708	2.29024	0.13	1
Afap1l2	115.008	92.9378	133.223	88.8128	84.8453	125.244	-0.219106	6.72794	1.87414	0.171	1
Aff1	16.9919	12.6881	19.6406	17.0612	17.0268	15.8775	0.0200811	4.05221	0.00804496	0.929	1
Aff2	6.5284	14.4706	9.21812	5.25105	18.4712	13.2312	0.259093	3.48973	0.413077	0.52	1
Aff3	36.2303	32.9278	53.1316	30.9186	46.0846	48.0312	0.036043	5.356	0.0346075	0.852	1
Aff4	103.082	123.527	151.196	76.9269	120.411	153.808	-0.147296	6.91209	0.615797	0.433	1
Afg3l1	80.1349	91.3278	93.9877	78.9174	89.0255	101.101	-0.00435219	6.47436	0.000744921	0.978	1
Afg3l2	71.2394	54.3175	77.3117	58.7094	53.3915	80.4386	-0.10555	6.03338	0.387614	0.534	1
Afmid	2.36711	3.16245	4.03003	2.55917	2.42998	2.93624	-0.261852	1.54857	0.670821	0.413	1
Aftph	39.5624	33.3495	47.017	30.1035	37.5372	47.7412	-0.0832173	5.28393	0.234174	0.628	1
Aga	47.2668	37.7961	31.2212	43.1458	37.0274	35.4524	-0.0121902	5.2837	0.00479429	0.945	1
Agap1	28.0887	39.6361	50.9544	42.3875	45.7447	50.5324	0.230886	5.41797	1.35944	0.244	1
Agap2	2.87973	4.17827	5.23441	2.7677	3.39857	5.29249	-0.144632	1.97255	0.228913	0.632	1
Agap3	129.588	154.174	170.651	118.689	148.908	180.198	-0.0509379	7.22519	0.0942574	0.759	1
Agbl2	2.6385	1.41831	3.47416	1.68716	1.64831	6.27124	0.0767645	1.46008	0.0429526	0.836	1
Agbl3	13.5543	13.4548	13.3408	14.4262	14.291	13.05	0.0340905	3.78553	0.0263863	0.871	1
Agbl4	2.1108	1.51414	1.62128	1.6682	1.71628	2.79125	0.157904	0.949933	0.199315	0.655	1
Agbl5	11.0214	10.0815	16.2128	7.69648	11.3512	16.095	-0.121894	3.57738	0.279394	0.597	1
Ager	1.56802	1.47581	1.34334	0.72036	1.07055	1.6675	-0.447284	0.421009	1.30235	0.254	1
Agfg1	46.2566	48.1459	56.3741	40.6056	55.1248	62.6399	0.0438477	5.68034	0.064756	0.799	1
Agfg2	49.1213	48.4334	51.2324	45.7808	36.2457	52.2724	-0.173571	5.5585	1.00289	0.317	1
Aggf1	69.6865	67.5807	87.5953	60.4344	77.5383	91.0598	0.00432105	6.23324	0.000699771	0.979	1
Agk	29.1441	25.7404	31.8234	28.0561	30.4852	29.9787	0.0178836	4.8698	0.0100626	0.92	1
Agl	33.6521	27.8487	39.4202	34.1413	27.6134	30.5224	-0.13125	5.01105	0.451551	0.502	1
Agmo	31.5866	20.0097	26.6816	21.6298	22.3626	25.2662	-0.195138	4.62025	0.908859	0.34	1
Agpat1	30.3503	33.6178	44.6546	28.132	39.6613	39.7299	-0.0195907	5.16566	0.0105648	0.918	1
Agpat2	8.03611	9.1232	8.7549	10.3694	6.93308	11.3825	0.116315	3.18873	0.203035	0.652	1
Agpat3	212.482	207.61	315.223	171.048	179.699	264.298	-0.276147	7.80232	3.22409	0.0726	1
Agpat4	46.528	51.2317	39.9297	54.8042	41.0547	45.8924	0.0314125	5.55056	0.0302722	0.862	1
Agpat5	175.106	137.212	157.866	141.172	158.849	148.625	-0.084439	7.26063	0.267187	0.605	1
Agpat6	98.906	89.2387	113.999	74.8416	92.2032	112.882	-0.137902	6.59247	0.746257	0.388	1
Agpat9	1.79418	0.996652	1.89921	0.815144	1.17251	1.305	-0.520746	0.436253	1.75224	0.186	1
Agphd1	4.8096	3.67994	4.95648	2.80561	3.02473	4.85749	-0.392762	2.00585	1.79892	0.18	1
Agps	27.1087	18.9939	35.1585	18.1227	22.7364	41.0712	-0.0595369	4.74243	0.0895154	0.765	1
Agrn	57.2479	51.2126	69.1127	60.9273	53.8673	65.2499	0.0118535	5.89481	0.00498	0.944	1
Agtpbp1	38.8236	32.1229	38.7717	31.6011	38.3868	47.8137	0.0686642	5.23788	0.155876	0.693	1
Agtrap	34.6925	35.8028	43.7282	35.3356	29.4996	40.1287	-0.137726	5.18806	0.627778	0.428	1
Agxt2l2	13.3131	13.7231	13.4798	12.8148	12.8806	15.08	-0.0139427	3.76358	0.00447779	0.947	1
Ahctf1	26.2191	22.3288	29.6925	24.9093	21.5469	31.8999	-0.0239343	4.69958	0.0171701	0.896	1
Ahcy	22.4649	21.888	24.4118	22.6534	22.8384	21.1337	-0.0591093	4.50234	0.09841	0.754	1
Ahcyl1	730.698	478.853	891.054	464.272	542.055	754.035	-0.27336	9.31662	2.23479	0.135	1
Ahcyl2	114.963	96.2727	137.206	118.689	88.4477	181.902	0.102099	6.92562	0.32699	0.567	1
Ahdc1	10.1771	12.7073	25.9404	10.5779	12.5237	24.8312	-0.0314599	3.98052	0.0220097	0.882	1
Ahi1	222.357	242.282	143.46	274.893	195.129	150.8	0.0196604	7.698	0.0120867	0.912	1
Ahnak2	0.753856	0.670823	1.29702	1.32698	0.254893	1.34125	0.106761	-0.084657	0.0384917	0.844	1
Ahr	2.24649	1.41831	2.36243	1.83881	1.75026	4.60374	0.273733	1.22154	0.587544	0.443	1
Ahrr	2.21634	1.45664	2.9183	1.34594	1.59733	1.84875	-0.441957	0.928989	1.57539	0.209	1
Ahsa1	168.698	189.709	122.8	186.251	195.435	129.847	0.0688917	7.38627	0.190983	0.662	1
Ahsa2	77.1949	91.6345	61.0527	78.5003	107.888	74.4574	0.169256	6.36507	0.940428	0.332	1
AI115009	6.89025	9.35319	4.77119	7.98083	6.55924	4.74874	-0.126876	2.78571	0.221463	0.638	1
AI118078	0.437237	0.402494	1.52863	0.625576	0.390835	1.305	0.079016	-0.430146	0.0329345	0.856	1
AI314180	44.4926	40.1344	50.9544	40.871	40.324	59.8849	0.0201705	5.51753	0.0152524	0.902	1
AI314976	98.1973	104.955	60.5431	100.888	97.335	58.5436	-0.0566884	6.45986	0.129064	0.719	1
AI316807	44.9751	50.0818	40.9025	41.3259	45.7617	38.8599	-0.127356	5.45709	0.590177	0.442	1
AI317395	0.99509	1.11165	1.15805	1.00471	1.1895	0.724999	-0.158223	0.123947	0.160658	0.689	1
AI413582	32.1294	44.696	22.6052	43.6197	29.9924	21.9312	-0.0713792	5.04841	0.112576	0.737	1
AI428936	1.68864	2.03164	0.972766	0.511835	0.509785	2.89999	-0.828905	0.525042	1.79752	0.18	1
AI429214	4.97545	4.46577	5.32705	3.7345	5.84554	4.56749	-0.0737101	2.28341	0.063061	0.802	1
AI462493	44.568	55.1417	31.6381	58.5198	50.5537	29.7612	0.0424139	5.51755	0.0539123	0.816	1
AI480526	2.57819	3.67994	3.01094	3.16579	2.76983	5.11124	0.174436	1.76228	0.286901	0.592	1
AI480653	15.4541	14.0873	24.875	11.6205	14.9197	25.4475	-0.111201	4.12622	0.307596	0.579	1
AI504432	0.512622	0.862487	0.972766	0.568705	1.20649	1.015	0.259323	-0.17191	0.323203	0.57	1
AI593442	27.1991	23.4596	46.6928	29.8949	32.3884	58.2899	0.287979	5.15852	2.91262	0.0879	1
AI597468	43.8141	39.3486	59.8483	34.3498	49.959	73.1161	0.0892416	5.62742	0.244488	0.621	1
AI597479	38.3261	28.1171	53.5021	24.8524	41.2756	55.6074	-0.00562094	5.31261	0.000728406	0.978	1
AI606181	0.934782	1.9933	1.89921	2.00943	2.26005	2.03	0.388634	0.923424	0.980708	0.322	1
AI646023	14.5042	10.8673	19.4553	11.867	10.1617	15.5512	-0.257553	3.76994	1.32781	0.249	1
AI836003	3.22651	4.6191	4.35429	3.14684	4.72401	4.53124	0.00243705	2.04724	6.22e-05	0.994	1
AI837181	23.5655	31.2029	44.6083	28.3026	30.2982	45.3849	0.0542291	5.06869	0.086277	0.769	1
AI846148	23.4148	32.5828	31.4528	26.4258	31.8446	36.6487	0.0907504	4.92266	0.219301	0.64	1
AI848100	21.5301	21.9263	31.1748	25.5728	25.6422	32.9512	0.168399	4.71873	0.881977	0.348	1
AI854517	43.6935	67.5615	54.4749	48.7381	64.5898	52.1274	-0.0252437	5.79304	0.0153671	0.901	1
AI854703	5.51823	6.76573	6.06821	5.21313	7.44287	6.19874	0.0205737	2.64718	0.005653	0.94	1
AI987944	26.4905	22.3672	19.3627	26.0467	25.5572	18.705	0.0226876	4.54576	0.0146925	0.904	1
Aif1	4.23667	4.59993	2.17714	5.21313	4.06129	2.2475	0.0530486	1.97207	0.0315648	0.859	1
Aif1l	166.919	140.854	151.057	138.859	109.587	133.146	-0.281392	7.13255	2.78969	0.0949	1
Aifm1	75.7927	59.8374	62.1181	69.856	69.2798	67.6786	0.0497458	6.07972	0.0919274	0.762	1
Aifm2	13.3734	11.9215	16.2128	10.6537	8.53041	16.6387	-0.270925	3.67638	1.46418	0.226	1
Aifm3	22.7966	14.2406	27.6544	19.317	14.291	37.1562	0.0344462	4.47152	0.0221706	0.882	1
Aig1	66.1735	72.2573	54.9381	66.8039	60.7494	54.4112	-0.100693	5.97827	0.384874	0.535	1
Aim1	0.588008	0.114998	0.324255	0.36018	0.169928	1.63125	0.42776	-0.932757	0.338975	0.56	1
Aim2	2.5028	5.61575	5.37337	4.24633	6.8821	9.38873	0.546194	2.48996	2.49132	0.114	1
Aimp1	73.0638	83.9104	43.1723	86.8224	82.3983	46.0374	0.0862196	6.13772	0.277862	0.598	1
Aimp2	54.2626	50.7909	43.3576	59.5435	51.1994	38.4974	-0.0198199	5.64805	0.0130106	0.909	1
Aip	91.9554	121.534	75.2272	118.499	120.836	82.3599	0.134479	6.68525	0.61935	0.431	1
Ajap1	12.7251	12.9565	10.6078	11.0898	10.0258	9.20748	-0.272483	3.48989	1.51262	0.219	1
Ak1	50.6139	51.6342	70.6877	42.7666	45.7447	66.4461	-0.186814	5.76128	1.37815	0.24	1
AK129341	2.86465	2.91329	4.169	3.0331	3.27962	5.90874	0.232189	1.86996	0.642581	0.423	1
Ak2	128.186	161.036	114.045	158.403	140.378	113.499	0.0112185	7.1002	0.00436171	0.947	1
Ak3	194.314	186.451	243.794	148.356	196.267	240.482	-0.12219	7.64595	0.561129	0.454	1
Ak4	25.7819	14.3365	34.0005	14.2745	14.257	28.7462	-0.423322	4.4303	3.48991	0.0617	1
Ak5	84.3867	59.9524	72.2626	66.1784	54.3261	75.2549	-0.168669	6.10066	0.854389	0.355	1
Ak8	0.693548	0.594158	0.648511	0.815144	0.798664	3.04499	0.895949	0.100012	3.81999	0.0506	1
Akap1	26.6564	26.5263	42.7091	23.5065	28.429	40.9624	-0.0614266	4.96041	0.12373	0.725	1
Akap10	15.243	11.1357	20.706	12.5873	14.274	23.0187	0.0511486	3.99617	0.0590269	0.808	1
Akap11	51.1115	49.2193	69.6686	43.2216	59.7128	78.1186	0.0597405	5.85706	0.121075	0.728	1
Akap13	26.2191	25.8171	30.1094	30.3689	25.4043	43.2099	0.222586	4.90568	1.49862	0.221	1
Akap17b	8.15673	9.41069	6.94833	11.6395	9.99179	10.73	0.388587	3.25993	2.6627	0.103	1
Akap5	8.32257	8.70154	12.4607	6.14202	8.29251	11.8537	-0.202559	3.20297	0.716875	0.397	1
Akap6	35.5217	37.7578	37.2894	26.5965	41.8534	41.7237	-0.0335775	5.19876	0.0299686	0.863	1
Akap7	34.1648	28.2896	29.7389	30.5774	35.9229	33.7487	0.103618	5.00693	0.349088	0.555	1
Akap8	64.0476	57.3075	69.437	48.0556	66.561	82.8674	0.00997881	6.0062	0.00328344	0.954	1
Akap8l	81.899	79.253	65.2217	68.3774	66.578	90.7698	-0.0314706	6.23351	0.0323458	0.857	1
Akap9	111.134	155.152	98.0641	170.934	169.623	112.846	0.285133	7.1075	2.53107	0.112	1
Akd1	0.738779	0.191664	0.370578	0.379137	0.458807	1.3775	0.448447	-0.728758	0.546246	0.46	1
Akirin1	85.5929	79.3296	89.1702	83.6945	92.2541	103.457	0.115718	6.47148	0.558655	0.455	1
Akirin2	110.847	129.718	85.0476	119.826	147.022	97.1498	0.143671	6.85846	0.765977	0.381	1
Akna	9.90567	12.8415	21.7714	11.431	11.7421	18.0525	-0.0896053	3.82015	0.159882	0.689	1
Akr1a1	587.164	785.592	493.563	702.749	741.924	502.134	0.0373651	9.32694	0.0464569	0.829	1
Akr1b3	68.7065	66.0282	56.1425	76.5857	52.8987	48.8287	-0.118635	5.95748	0.398838	0.528	1
Akr1c13	3.01543	1.59081	1.6676	2.04734	1.78425	1.34125	-0.289789	0.999776	0.62066	0.431	1
Akr1c14	1.83941	0.364161	1.38967	3.56389	1.17251	2.79125	1.06517	0.920528	3.64557	0.0562	1
Akr1e1	118.793	106.278	85.2792	105.021	112.476	77.4299	-0.095923	6.67012	0.370488	0.543	1
Akr7a5	92.8751	110.648	93.7561	93.135	89.4673	77.9011	-0.211073	6.54783	1.63274	0.201	1
Akt1	198.822	257.366	287.244	185.303	264.613	316.607	0.0111614	7.96576	0.0037074	0.951	1
Akt1s1	80.4063	105.626	93.1539	95.4288	112.646	96.9323	0.106695	6.61032	0.373446	0.541	1
Akt2	108.073	123.661	172.967	94.0828	131.847	161.53	-0.0783603	7.03292	0.201928	0.653	1
Akt2-ps	0.814165	0.766655	1.43599	0.682447	0.815656	1.015	-0.223826	-0.101883	0.324556	0.569	1
Akt3	15.9064	19.8755	20.984	12.2082	21.326	21.3512	-0.0768425	4.2139	0.107736	0.743	1
Aktip	148.811	150.878	135.585	136.3	146.784	147.465	-0.033009	7.17585	0.0464043	0.829	1
AL593857.1	0	0	8.84754	0.0189568	0	8.19249	-0.0821714	1.27423	0.0187923	0.891	1
Alad	77.8281	88.7787	61.9791	72.5479	78.8468	57.8911	-0.143566	6.20302	0.796788	0.372	1
Alas1	106.882	72.1614	86.6225	83.2016	68.77	99.6873	-0.104565	6.42624	0.308486	0.579	1
Alcam	66.5052	58.5725	105.244	88.2441	66.7989	113.354	0.22799	6.36376	1.63243	0.201	1
Aldh16a1	17.1879	16.4256	19.8259	16.246	16.619	25.0487	0.0714853	4.20493	0.137157	0.711	1
Aldh18a1	84.447	79.598	116.408	76.2634	92.56	108.605	-0.0240731	6.5304	0.021949	0.882	1
Aldh1a1	97.9109	51.1359	64.3879	49.7617	63.1284	90.2986	-0.12245	6.10751	0.257542	0.612	1
Aldh1a2	89.2264	33.522	87.2247	57.3445	62.5846	128.869	0.152344	6.22956	0.304543	0.581	1
Aldh1b1	7.99088	10.9823	10.6078	8.92868	14.4269	8.98998	0.105118	3.3815	0.144414	0.704	1
Aldh1l2	10.4032	12.1515	18.6678	12.5305	16.67	15.9862	0.158232	3.84359	0.438388	0.508	1
Aldh2	273.348	198.449	294.285	192.222	182.945	290.181	-0.242531	7.88714	2.03423	0.154	1
Aldh3a2	57.8962	45.6543	77.0801	44.2642	51.4203	68.8386	-0.147406	5.83423	0.756543	0.384	1
Aldh3b2	0.648316	0.824154	0.370578	1.2322	0.594749	0.0724999	-0.167353	-0.46585	0.0912426	0.763	1
Aldh5a1	39.879	39.9619	66.1944	46.577	35.634	52.0187	-0.101883	5.53793	0.287302	0.592	1
Aldh7a1	218.272	166.077	186.076	165.417	145.289	160.768	-0.28973	7.4427	2.98665	0.084	1
Aldh9a1	91.0206	77.988	99.8243	69.5527	72.0327	89.7186	-0.238578	6.37654	2.31011	0.129	1
[truncated: 13,019 more rows]
