# Supplementary material for: Transcriptional regulation of neural stem cell expansion in the adult hippocampus
Source: eLife. 2022 Jan 4;11:e72195. doi: 10.7554/eLife.72195 (PMC8820733; doi:10.7554/eLife.72195)
Supplement: Supplementary file 2. [file elife-72195-supp2.xlsx]

## Sheet: MF
source	term_name	term_id	adjusted_p_value	negative_log10_of_adjusted_p_value	term_size	query_size	intersection_size	effective_domain_size	intersections
GO:MF	catalytic activity	GO:0003824	0.000128532	3.89099	5914	221	97	21123	ACAD12,ACOT11,ACOX1,ACP6,ACSBG1,ACSL3,ACSL6,ACSS1,AKR1B10,AKR1B8,ALDH3B1,ALDH4A1,ALDH6A1,ALDOC,ASS1,ATP13A4,BDH2,BMPR1B,CAPN9,CBS,CML5,CNP,CPE,CRYZ,CTSO,CYP2J9,CYP46A1,CYP4F14,CYP4F15,DDO,DDX3Y,DIO2,DPP10,ECEL1,ECHDC3,EGFR,EIF2S3Y,EPHX2,EPM2A,FGFR3,FGFRL1,FKBP10,FMO5,GAA,GADL1,GBP6,GPD1,GPLD1,GSTM4,HEPH,HHIPL1,HTRA1,INPPL1,KDM5D,KIF17,LCAT,LFNG,LPO,LYPLAL1,MERTK,MFN1,MGLL,MYH14,MYO6,NTRK2,OPLAH,P…
GO:MF	phospholipase activity	GO:0004620	0.00234014	2.63076	91	221	8	21123	GPLD1,LCAT,PLA2G4E,PLA2G7,PLBD1,PLCB3,PLCD4,PNPLA7
GO:MF	CoA-ligase activity	GO:0016405	0.00246197	2.60872	25	221	5	21123	ACSBG1,ACSL3,ACSL6,ACSS1,SLC27A1
GO:MF	lipase activity	GO:0016298	0.00293326	2.53265	124	221	9	21123	GPLD1,LCAT,MGLL,PLA2G4E,PLA2G7,PLBD1,PLCB3,PLCD4,PNPLA7
GO:MF	long-chain fatty acid-CoA ligase activity	GO:0004467	0.0049317	2.307	14	221	4	21123	ACSBG1,ACSL3,ACSL6,SLC27A1
GO:MF	acid-thiol ligase activity	GO:0016878	0.00531852	2.27421	29	221	5	21123	ACSBG1,ACSL3,ACSL6,ACSS1,SLC27A1
GO:MF	binding	GO:0005488	0.00540392	2.26729	14952	221	184	21123	ACAD12,ACOT11,ACOX1,ACSBG1,ACSL3,ACSL6,ACSS1,ADCYAP1R1,ADNP,AGT,AKR1B10,ALDH4A1,ALDOC,ANKS1,ARAP1,ARHGEF10,ARRB1,ARVCF,ASS1,ATP13A4,BCAN,BDH2,BMPR1B,C4B,CACNA2D4,CAPG,CAPN9,CASKIN1,CBS,CCNA1,CD109,CER1,CHRM4,CHRNA7,CLU,CNP,COL2A1,CPE,CPNE7,CRB2,CRYZ,CTNNA3,CUL9,CWC22,CXCL14,CYB5D2,CYP2J9,CYP46A1,CYP4F14,CYP4F15,DDO,DDX3Y,DIO2,DNER,DPP10,ECEL1,EGFR,EIF2S3Y,EPHX2,EPM2A,ETV5,EVC2,FBF1,FCGR1,FGFR3,FG…
GO:MF	anion binding	GO:0043168	0.0067175	2.17279	2912	221	54	21123	ACAD12,ACOT11,ACOX1,ACSBG1,ACSL3,ACSL6,ACSS1,AKR1B10,ARAP1,ASS1,ATP13A4,BCAN,BMPR1B,CBS,CPNE7,CRYZ,CYP4F14,DDO,DDX3Y,EGFR,EIF2S3Y,FGFR3,FGFRL1,FMO5,GADL1,GBP6,GPNMB,GSTM4,HIST1H1E,INPPL1,KIF17,LRTM2,MERTK,MFN1,MYH14,MYO6,NTRK2,OPLAH,P2RX7,PAPSS2,PCSK6,PCX,PDE1C,PDK4,PI4KB,PLA2G4E,PLA2G7,PYGB,PYGL,RASAL1,SARDH,SLC1A3,THBS4,VNN1
GO:MF	growth factor binding	GO:0019838	0.0103696	1.98424	145	221	9	21123	CD109,COL2A1,EGFR,FGFR3,FGFRL1,HAP1,HTRA1,NTRK2,PCSK6
GO:MF	oxidoreductase activity	GO:0016491	0.0105086	1.97846	833	221	23	21123	ACAD12,ACOX1,AKR1B10,AKR1B8,ALDH3B1,ALDH4A1,ALDH6A1,BDH2,CBS,CRYZ,CYP2J9,CYP46A1,CYP4F14,CYP4F15,DDO,DIO2,FMO5,GPD1,HEPH,KDM5D,LPO,RETSAT,SARDH
GO:MF	ligase activity, forming carbon-sulfur bonds	GO:0016877	0.0268367	1.57127	40	221	5	21123	ACSBG1,ACSL3,ACSL6,ACSS1,SLC27A1
GO:MF	fatty acid ligase activity	GO:0015645	0.0278379	1.55536	21	221	4	21123	ACSBG1,ACSL3,ACSL6,SLC27A1
GO:MF	ligand-gated ion channel activity	GO:0015276	0.0282867	1.54842	128	221	8	21123	CHRNA7,GABRA2,GABRG1,GRIK1,GRIN2C,KCNJ16,P2RX7,RASA3
GO:MF	ligand-gated channel activity	GO:0022834	0.033321	1.47728	131	221	8	21123	CHRNA7,GABRA2,GABRG1,GRIK1,GRIN2C,KCNJ16,P2RX7,RASA3
GO:MF	angiotensin receptor binding	GO:0031701	0.0415576	1.38135	9	221	3	21123	AGT,ARAP1,ARRB1
GO:MF	extracellular ligand-gated ion channel activity	GO:0005230	0.0456774	1.3403	71	221	6	21123	CHRNA7,GABRA2,GABRG1,GRIK1,GRIN2C,P2RX7

## Sheet: CC
source	term_name	term_id	adjusted_p_value	negative_log10_of_adjusted_p_value	term_size	query_size	intersection_size	effective_domain_size	intersections
GO:CC	cytoplasm	GO:0005737	0.000118874	3.92491	11077	221	152	21265	ACAD12,ACOT11,ACOX1,ACP6,ACSBG1,ACSL3,ACSL6,ACSS1,ADCYAP1R1,ADNP,AGT,AKR1B10,AKR1B8,ALDH3B1,ALDH4A1,ALDH6A1,ALDOC,ANKS1,ARAP1,ARHGEF10,ARRB1,ARRDC2,ARVCF,ASS1,BDH2,CAPG,CAPN9,CASKIN1,CBS,CCDC8,CCNA1,CD109,CHRM4,CHRNA7,CLRN1,CLU,CML5,CNP,COL2A1,CPE,CPNE7,CREG2,CRYZ,CTNNA3,CTSO,CUL9,CWC22,CXCL14,CYP2J9,CYP46A1,CYP4F14,DDO,DDX3Y,DNER,ECHDC3,EGFR,EIF2S3Y,EPHX2,EPM2A,EVC2,FAM198A,FAM69C,FBF1,FGFR3,FGF…
GO:CC	neuron projection	GO:0043005	0.000269884	3.56882	1556	221	38	21265	ADCYAP1R1,ADNP,ALDOC,ANKS1,ARRB1,ASS1,BCAN,BMPR1B,C4B,CHRM4,CHRNA7,CLRN1,CLU,CPE,CYP46A1,DNER,EPM2A,GABRA2,GABRG1,HAP1,HTR7,IFT122,KCNC4,KIF17,KNDC1,MERTK,MGLL,MYH14,NDRG2,NGEF,NTRK2,PLEKHB1,PTPRN,PYGB,SLC1A3,SORCS2,SRCIN1,TTYH1
GO:CC	plasma membrane bounded cell projection	GO:0120025	0.000411434	3.3857	2397	221	50	21265	ADCYAP1R1,ADNP,ALDOC,ANKS1,ARRB1,ASS1,BCAN,BMPR1B,C4B,CHRM4,CHRNA7,CLRN1,CLU,CNP,CPE,CTNNA3,CYP46A1,DNER,EPM2A,EVC2,FBF1,GABRA2,GABRG1,GFAP,GPR83,HAP1,HTR7,IFT122,INPPL1,KCNC4,KIF17,KNDC1,MERTK,MGLL,MLC1,MYH14,MYO6,NDRG2,NGEF,NTRK2,PDE1C,PLEKHB1,PTPRN,PYGB,S100B,SLC1A3,SORCS2,SRCIN1,TESC,TTYH1
GO:CC	cell projection	GO:0042995	0.00121402	2.91578	2488	221	50	21265	ADCYAP1R1,ADNP,ALDOC,ANKS1,ARRB1,ASS1,BCAN,BMPR1B,C4B,CHRM4,CHRNA7,CLRN1,CLU,CNP,CPE,CTNNA3,CYP46A1,DNER,EPM2A,EVC2,FBF1,GABRA2,GABRG1,GFAP,GPR83,HAP1,HTR7,IFT122,INPPL1,KCNC4,KIF17,KNDC1,MERTK,MGLL,MLC1,MYH14,MYO6,NDRG2,NGEF,NTRK2,PDE1C,PLEKHB1,PTPRN,PYGB,S100B,SLC1A3,SORCS2,SRCIN1,TESC,TTYH1
GO:CC	neuronal cell body	GO:0043025	0.00215646	2.66626	711	221	22	21265	ADNP,ASS1,BMPR1B,C4B,CHRM4,CHRNA7,CPE,DNER,EPM2A,GABRA2,HTR7,KCNC4,KNDC1,NTRK2,P2RX7,PDE1C,PTPRN,S100B,SEZ6L,SLC1A3,SORCS2,SRCIN1
GO:CC	somatodendritic compartment	GO:0036477	0.00216372	2.6648	1058	221	28	21265	ADNP,ARRB1,ASS1,BCAN,BMPR1B,C4B,CHRM4,CHRNA7,CLU,CPE,CYP46A1,DNER,EPM2A,GABRA2,HAP1,HTR7,KCNC4,KIF17,KNDC1,NTRK2,P2RX7,PDE1C,PTPRN,S100B,SEZ6L,SLC1A3,SORCS2,SRCIN1
GO:CC	cell body	GO:0044297	0.00440283	2.35627	801	221	23	21265	ADNP,ASS1,BMPR1B,C4B,CHRM4,CHRNA7,CPE,DNER,EPM2A,GABRA2,GFAP,HTR7,KCNC4,KNDC1,NTRK2,P2RX7,PDE1C,PTPRN,S100B,SEZ6L,SLC1A3,SORCS2,SRCIN1
GO:CC	dendrite	GO:0030425	0.00477198	2.3213	748	221	22	21265	ADNP,ARRB1,BCAN,BMPR1B,C4B,CHRM4,CHRNA7,CLU,CPE,CYP46A1,DNER,EPM2A,GABRA2,HAP1,HTR7,KCNC4,KIF17,KNDC1,NTRK2,SLC1A3,SORCS2,SRCIN1
GO:CC	dendritic tree	GO:0097447	0.00497319	2.30337	750	221	22	21265	ADNP,ARRB1,BCAN,BMPR1B,C4B,CHRM4,CHRNA7,CLU,CPE,CYP46A1,DNER,EPM2A,GABRA2,HAP1,HTR7,KCNC4,KIF17,KNDC1,NTRK2,SLC1A3,SORCS2,SRCIN1
GO:CC	plasma membrane region	GO:0098590	0.0132661	1.87726	1298	221	30	21265	ADCYAP1R1,ARRB1,CHRM4,CHRNA7,CPE,CRB2,EGFR,EVC2,FAM198A,GABRA2,GABRG1,GRIK1,GRIN2C,HEPH,HTR7,KCNC4,KCNJ16,KIF17,KLHDC8B,LPO,MLC1,MYO6,OTOA,SLC1A3,SLC27A1,SORCS2,SORCS3,ST14,TESC,TTYH1
GO:CC	cellular anatomical entity	GO:0110165	0.0149811	1.82446	19679	221	218	21265	ACAD12,ACOT11,ACOX1,ACP6,ACSBG1,ACSL3,ACSL6,ACSS1,ADCYAP1R1,ADNP,AGT,AKR1B10,AKR1B8,ALDH3B1,ALDH4A1,ALDH6A1,ALDOC,ANKS1,ARAP1,ARHGEF10,ARRB1,ARRDC2,ARVCF,ASS1,ATP13A4,BCAN,BDH2,BMPR1B,C4B,CACNA2D4,CAPG,CAPN9,CASKIN1,CBS,CCDC8,CCNA1,CD109,CER1,CHRM4,CHRNA7,CLRN1,CLU,CML5,CNP,CNTNAP5C,COL2A1,CPE,CPNE7,CRB2,CREG2,CRYZ,CTNNA3,CTSO,CUL9,CWC22,CXCL14,CYB5D2,CYP2J9,CYP46A1,CYP4F14,CYP4F15,DDO,DDX3Y,DIO2…
GO:CC	postsynapse	GO:0098794	0.0252383	1.59794	717	221	20	21265	ALDOC,ARRB1,CHRM4,CHRNA7,CYP46A1,GABRA2,GABRG1,GRIK1,GRIN2C,HAP1,HTR7,KCNC4,NTRK2,P2RX7,PLCB3,SH2D5,SLC1A3,SORCS2,SORCS3,SRCIN1
GO:CC	synapse	GO:0045202	0.0293737	1.53204	1423	221	31	21265	ALDOC,ARRB1,BCAN,C4B,CHRM4,CHRNA7,CLU,CPE,CYP46A1,EGFR,ETV5,GABRA2,GABRG1,GRIK1,GRIN2C,HAP1,HTR7,KCNC4,MGLL,NDRG2,NTRK2,P2RX7,PLCB3,PTPRN,SH2D5,SLC1A3,SORCS2,SORCS3,SPARCL1,SRCIN1,THBS4
GO:CC	integral component of plasma membrane	GO:0005887	0.0480326	1.31846	1462	221	31	21265	CHRM4,CHRNA7,DPP10,ECEL1,EGFR,FCGR1,FGFR3,FGFRL1,GABRA2,GABRG1,GPC5,GPNMB,GRIN2C,HTR7,ICOSL,IGDCC4,KCNC4,KCNK13,MERTK,NTRK2,P2RX7,PLXNA1,PLXNB1,SLC1A3,SLC20A2,SLC27A1,SORCS2,SORCS3,ST14,TLR3,TMEM130
