# Supplementary material for: Transcriptional regulation of neural stem cell expansion in the adult hippocampus
Source: eLife. 2022 Jan 4;11:e72195. doi: 10.7554/eLife.72195 (PMC8820733; doi:10.7554/eLife.72195)
Supplement: Supplementary file 3. [file elife-72195-supp3.xlsx]

## Sheet: MF
source	term_name	term_id	adjusted_p_value	negative_log10_of_adjusted_p_value	term_size	query_size	intersection_size	effective_domain_size	intersections
GO:MF	extracellular matrix structural constituent	GO:0005201	1.71532e-09	8.76566	133	383	19	21123	ABI3BP,ASPN,COL1A2,COL3A1,COL5A2,COL8A1,COL8A2,ELN,FN1,HMCN1,IGFBP6,LAMA1,MFAP5,MMRN2,NID1,OGN,PCOLCE2,POSTN,TINAGL1
GO:MF	protein binding	GO:0005515	2.29489e-08	7.63924	10383	383	251	21123	1110017D15RIK,ABCC9,ABI3BP,ACE,ACOX2,ACTA2,ACVRL1,ADAMTSL5,ADH1,ADM,AHNAK,AKAP12,ALOX12,ANXA1,AOC3,AQP1,ARMC4,ASB2,ASPN,ATP2A3,BACH1,BC020535,BC021891,BCAM,BHLHE22,BMP2,BMP4,CAPN6,CBR2,CCDC153,CCL2,CCL7,CD24A,CD34,CD74,CD93,CDC42EP3,CDH3,CDH5,CDKN1C,CHL1,CISH,CLDN1,CLDN11,CLDN2,CLDN5,CLEC14A,CLIC6,CMTM8,CNN1,CNN2,COBLL1,COL1A2,COL3A1,COL5A2,COL8A1,COL8A2,CP,CRABP2,CRB3,CTGF,CXADR,DES,DYNLT1A,EBF1…
GO:MF	binding	GO:0005488	7.65195e-07	6.11623	14952	383	321	21123	1110017D15RIK,ABCA4,ABCC9,ABI3BP,ACE,ACOX2,ACTA2,ACTG2,ACVRL1,ADAMTS5,ADAMTSL5,ADAP2,ADH1,ADM,AHNAK,AK7,AKAP12,ALAS2,ALOX12,ANXA1,AOC3,AQP1,ARL15,ARL4A,ARMC4,ASB2,ASPN,ATP10D,ATP11C,ATP2A3,BACH1,BC020535,BC021891,BCAM,BHLHE22,BMP2,BMP4,BMX,CALML4,CAPN11,CAPN6,CAR14,CAR3,CBR2,CCDC153,CCL2,CCL7,CD24A,CD34,CD74,CD93,CDC42EP3,CDH3,CDH5,CDKN1C,CH25H,CHL1,CISH,CLDN1,CLDN11,CLDN2,CLDN5,CLEC14A,CLIC6,CMT…
GO:MF	cell adhesion molecule binding	GO:0050839	9.44573e-06	5.02476	267	383	21	21123	BCAM,CDH3,CDH5,COL3A1,CTGF,CXADR,EMB,ESAM,F11R,FN1,IGF1,ITGA10,ITGA3,NEXN,NOS3,NOV,POSTN,PTPRB,THBS1,UTRN,VWF
GO:MF	structural molecule activity	GO:0005198	1.36626e-05	4.86447	614	383	33	21123	ABI3BP,AHNAK,ASPN,CLDN1,CLDN11,CLDN2,CLDN5,CMTM8,COL1A2,COL3A1,COL5A2,COL8A1,COL8A2,DES,ELN,FN1,HMCN1,IGFBP6,KRT18,LAMA1,MAL,MARVELD1,MFAP5,MMRN2,MYH11,NEXN,NID1,OGN,PCOLCE2,POSTN,TINAGL1,TPM1,TPM2
GO:MF	heparin binding	GO:0008201	3.17317e-05	4.49851	146	383	15	21123	ABI3BP,ADAMTS5,ADAMTSL5,BMP4,CCL2,CCL7,CTGF,FN1,NOV,PCOLCE2,PF4,PLA2G5,POSTN,THBS1,TMEM184A
GO:MF	actin binding	GO:0003779	6.53628e-05	4.18467	439	383	26	21123	ACE,CNN1,CNN2,COBLL1,EPS8L1,EPS8L2,IQGAP1,LMOD1,MYH11,MYLK,MYO1B,MYO1D,MYO5C,NEXN,NOS3,SYNE2,SYNPO2,TAGLN,TNS1,TNS4,TPM1,TPM2,TPM3,TRPV4,UTRN,XIRP1
GO:MF	sulfur compound binding	GO:1901681	9.8141e-05	4.00815	254	383	19	21123	ABI3BP,ADAMTS5,ADAMTSL5,BMP4,CCL2,CCL7,CD34,CTGF,FN1,GSTM2,NOV,PCOLCE2,PF4,PLA2G5,POSTN,PRMT8,SLC6A6,THBS1,TMEM184A
GO:MF	growth factor binding	GO:0019838	0.000187493	3.72702	145	383	14	21123	ACVRL1,COL1A2,COL3A1,CTGF,FGFBP1,FLT1,IGFBP3,IGFBP6,IGFBP7,KL,LRRC32,LTBP4,NOV,THBS1
GO:MF	collagen binding	GO:0005518	0.000231933	3.63464	70	383	10	21123	ABI3BP,ASPN,ITGA10,ITGA3,LOX,NID1,PCOLCE2,SRGN,THBS1,VWF
GO:MF	extracellular matrix binding	GO:0050840	0.00031019	3.50837	56	383	9	21123	ADAMTS5,BCAM,CLEC14A,ELN,ITGA3,NID1,THBS1,THSD1,TINAGL1
GO:MF	actin filament binding	GO:0051015	0.00191956	2.7168	201	383	15	21123	EPS8L1,EPS8L2,IQGAP1,MYH11,MYO1B,MYO1D,MYO5C,NEXN,SYNE2,TAGLN,TPM1,TPM2,TPM3,TRPV4,UTRN
GO:MF	protein-containing complex binding	GO:0044877	0.00199709	2.6996	1453	383	51	21123	ABI3BP,ACVRL1,ASPN,CD74,CD93,CDH5,CDKN1C,COL3A1,CTGF,CXADR,EPS8L1,EPS8L2,F11R,FN1,HBA-A1,HBA-A2,HBB-B1,HBB-Y,IGF1,IQGAP1,ITGA10,ITGA3,ITPR1,KRT8,LOX,LSR,MAF,MYH11,MYO1B,MYO1D,MYO5C,NEXN,NID1,NIPBL,NOV,P2RX1,PCOLCE2,RBP4,SCARF1,SRGN,SYNE2,TAGLN,THBS1,TPM1,TPM2,TPM3,TRPV4,TTR,UTRN,VWF,WDR63
GO:MF	DNA-binding transcription activator activity, RNA polymerase II-specific	GO:0001228	0.00228586	2.64095	466	383	24	21123	BACH1,EBF1,ETS1,FOXC1,FOXD1,FOXD2,FOXF2,FOXL2,GATA2,KLF4,KLF6,MAF,MECOM,NHLH2,ONECUT2,OTX2,SOX17,SOX18,TBX15,TBX2,TBX3,TCF21,ZIC1,ZIC3
GO:MF	glycosaminoglycan binding	GO:0005539	0.00230083	2.63811	204	383	15	21123	ABI3BP,ADAMTS5,ADAMTSL5,BMP4,CCL2,CCL7,CTGF,FN1,NOV,PCOLCE2,PF4,PLA2G5,POSTN,THBS1,TMEM184A
GO:MF	DNA-binding transcription activator activity	GO:0001216	0.00254742	2.5939	469	383	24	21123	BACH1,EBF1,ETS1,FOXC1,FOXD1,FOXD2,FOXF2,FOXL2,GATA2,KLF4,KLF6,MAF,MECOM,NHLH2,ONECUT2,OTX2,SOX17,SOX18,TBX15,TBX2,TBX3,TCF21,ZIC1,ZIC3
GO:MF	voltage-gated potassium channel activity involved in ventricular cardiac muscle cell action potential repolarization	GO:1902282	0.00316751	2.49928	8	383	4	21123	KCNE2,KCNE4,KCNJ8,KCNQ1
GO:MF	retinal binding	GO:0016918	0.00318651	2.49668	16	383	5	21123	CRABP2,OPN3,RBP1,RBP4,STRA6
GO:MF	DNA-binding transcription factor activity, RNA polymerase II-specific	GO:0000981	0.00440602	2.35595	833	383	34	21123	BACH1,BHLHE22,EBF1,ETS1,FOXC1,FOXD1,FOXD2,FOXF2,FOXL2,FOXP1,FOXQ1,FOXS1,GATA2,GATA6,HHEX,KLF2,KLF4,KLF6,MAF,MECOM,MNDAL,NHLH2,NKX6-1,ONECUT2,OTX2,SOX17,SOX18,TBX15,TBX2,TBX3,TCF21,ZFHX3,ZIC1,ZIC3
GO:MF	molecular function regulator	GO:0098772	0.00511696	2.29099	3260	383	91	21123	ABCC9,ADAP2,ADM,ANXA1,ARHGAP20,ATP2A3,BACH1,BHLHE22,BMP2,BMP4,CALML4,CCL2,CCL7,CD24A,CDKN1C,CISH,CMTM8,CTGF,DPEP1,EBF1,EDN1,EPS8L1,EPS8L2,ETS1,FGD5,FN1,FOXC1,FOXD1,FOXD2,FOXF2,FOXL2,FOXP1,FOXQ1,FOXS1,GATA2,GATA6,GPRC5B,HHEX,HSPB1,IGF1,IGFBP3,IL34,IQGAP1,ITPR1,KCNE2,KCNE4,KLF2,KLF4,KLF6,LY6A,LY6C1,MAF,MECOM,MNDAL,MRAP,NCF2,NHLH2,NKX6-1,NOV,OGN,ONECUT2,OTX2,PCOLCE2,PF4,PLN,PPP1R14A,PTPN14,RASGRP3,R…
GO:MF	RNA polymerase II cis-regulatory region sequence-specific DNA binding	GO:0000978	0.0052524	2.27964	660	383	29	21123	BACH1,EBF1,ETS1,FOXC1,FOXD1,FOXL2,FOXP1,FOXQ1,FOXS1,GATA2,GATA6,HHEX,KLF4,KLF6,MAF,MECOM,MNDAL,NHLH2,NKX6-1,ONECUT2,OTX2,SOX18,TBX15,TBX2,TBX3,TCF21,ZFHX3,ZIC1,ZIC3
GO:MF	calcium ion binding	GO:0005509	0.00916257	2.03798	716	383	30	21123	ANXA1,AOC3,ASPN,CALML4,CAPN11,CD93,CDH3,CDH5,EGFL7,EGFL8,ENPP2,HEG1,HMCN1,HSPG2,IQGAP1,ITPR1,LTBP4,MGP,NID1,NOTCH4,PAM,PCDH18,PCDHB19,PLA2G5,RASGRP3,S100A10,S100A11,SYT15,TGM2,THBS1
GO:MF	cis-regulatory region sequence-specific DNA binding	GO:0000987	0.0122468	1.91198	691	383	29	21123	BACH1,EBF1,ETS1,FOXC1,FOXD1,FOXL2,FOXP1,FOXQ1,FOXS1,GATA2,GATA6,HHEX,KLF4,KLF6,MAF,MECOM,MNDAL,NHLH2,NKX6-1,ONECUT2,OTX2,SOX18,TBX15,TBX2,TBX3,TCF21,ZFHX3,ZIC1,ZIC3
GO:MF	integrin binding	GO:0005178	0.0123508	1.90831	131	383	11	21123	COL3A1,CTGF,CXADR,F11R,FN1,IGF1,ITGA3,NOV,THBS1,UTRN,VWF
GO:MF	retinoid binding	GO:0005501	0.0134722	1.87056	34	383	6	21123	CRABP2,OPN3,PTGDS,RBP1,RBP4,STRA6
GO:MF	voltage-gated potassium channel activity involved in cardiac muscle cell action potential repolarization	GO:0086008	0.0143004	1.84465	11	383	4	21123	KCNE2,KCNE4,KCNJ8,KCNQ1
GO:MF	ion binding	GO:0043167	0.0183828	1.73559	6223	383	149	21123	ABCA4,ABCC9,ABI3BP,ACE,ACOX2,ACTA2,ACTG2,ACVRL1,ADAMTS5,ADAMTSL5,ADAP2,ADH1,AK7,ALAS2,ALOX12,ANXA1,AOC3,ARL15,ARL4A,ASPN,ATP10D,ATP11C,ATP2A3,BC021891,BMP4,BMX,CALML4,CAPN11,CAR14,CAR3,CCL2,CCL7,CD34,CD93,CDH3,CDH5,CH25H,CNDP1,COL1A2,COL3A1,COL5A2,CP,CRABP2,CTGF,CYB561,DDX46,DPEP1,EBF1,EEA1,EGFL7,EGFL8,ENO4,ENPP2,EPHA4,EPN3,F13A1,F5,FAHD1,FGD5,FIGN,FLT1,FN1,FN3KRP,FOLR1,FOXP1,GATA2,GATA6,GBP4,GDP…
GO:MF	cell adhesion mediator activity	GO:0098631	0.0260142	1.58479	38	383	6	21123	BCAM,CXADR,EMB,ESAM,ITGA10,NEXN
GO:MF	oxygen carrier activity	GO:0005344	0.0301046	1.52137	13	383	4	21123	HBA-A1,HBA-A2,HBB-B1,HBB-Y
GO:MF	isoprenoid binding	GO:0019840	0.0350815	1.45492	40	383	6	21123	CRABP2,OPN3,PTGDS,RBP1,RBP4,STRA6
GO:MF	retinol binding	GO:0019841	0.0415445	1.38149	14	383	4	21123	CRABP2,RBP1,RBP4,STRA6

## Sheet: CC
source	term_name	term_id	adjusted_p_value	negative_log10_of_adjusted_p_value	term_size	query_size	intersection_size	effective_domain_size	intersections
GO:CC	collagen-containing extracellular matrix	GO:0062023	6.67433e-16	15.1756	359	388	38	21265	ABI3BP,ADAMTS5,ADAMTSL1,ADAMTSL5,ANXA1,ASPN,CLEC14A,COL1A2,COL3A1,COL5A2,COL8A1,COL8A2,EGFL7,ELN,F13A1,FN1,HMCN1,HSPG2,IGF1,IGFBP6,LAMA1,LOX,LTBP4,MFAP5,MGP,MMRN2,NID1,NOV,OGN,PCOLCE2,PF4,POSTN,S100A10,S100A11,SEMA3C,TGM2,TINAGL1,VWF
GO:CC	extracellular matrix	GO:0031012	1.20051e-14	13.9206	481	388	42	21265	ABI3BP,ADAMTS5,ADAMTSL1,ADAMTSL5,ANXA1,ASPN,CLEC14A,COL1A2,COL3A1,COL5A2,COL8A1,COL8A2,CTGF,EGFL7,ELN,F13A1,FN1,HMCN1,HSPG2,IGF1,IGFBP6,LAMA1,LOX,LRRC32,LTBP4,MFAP5,MGP,MMRN2,NID1,NOV,OGN,PCOLCE2,PF4,POSTN,S100A10,S100A11,SEMA3C,TGM2,THBS1,TINAGL1,VWF,WNT6
GO:CC	extracellular region	GO:0005576	1.88204e-10	9.72537	2780	388	103	21265	ABI3BP,ACE,ADAMTS5,ADAMTSL1,ADAMTSL5,ADM,AHNAK,ANXA1,AOC3,APOF,AQP1,ASPN,BMP2,BMP4,CCL2,CCL7,CD34,CHL1,CLEC14A,CMTM8,COL1A2,COL3A1,COL5A2,COL8A1,COL8A2,CP,CTGF,CTLA2A,CXADR,DEFB11,DPEP1,EDN1,EGFL7,EGFL8,ELN,ENPP2,EPYC,F13A1,F5,FAM180A,FGFBP1,FN1,FOLR1,FOXL2,GBP4,GPRC5B,GSTM2,HBA-A1,HBA-A2,HBB-B1,HMCN1,HSPG2,IGF1,IGFBP3,IGFBP6,IGFBP7,IL17RE,IL18BP,IL34,KL,KRT18,LAMA1,LBP,LOX,LRRC32,LSR,LTBP4,MFAP5…
GO:CC	anchoring junction	GO:0070161	6.01374e-10	9.22086	659	388	42	21265	AHNAK,CDH3,CDH5,CLDN1,CLDN11,CLDN2,CLDN5,CRB3,CXADR,DES,EPHA4,ESAM,F11R,GJA4,GJC1,GRB7,HEG1,HMCN1,IQGAP1,KIRREL,KRT8,LAMA1,LIMS2,LSR,MAPK15,MYADM,MYLK,NEXN,NOV,PECAM1,PERP,PHLDB2,PODXL,PRKCH,SYNE2,SYNPO2,THSD1,TMEM204,TNS1,TNS4,TRPV4,WTIP
GO:CC	cell-cell junction	GO:0005911	8.04047e-09	8.09472	515	388	35	21265	AHNAK,CDH3,CDH5,CLDN1,CLDN11,CLDN2,CLDN5,CRB3,CXADR,DES,EPHA4,ESAM,F11R,GJA4,GJC1,HEG1,HMCN1,IQGAP1,KIRREL,KRT8,LAMA1,LIMS2,LSR,MAPK15,MYADM,MYLK,NEXN,NOV,PECAM1,PERP,PODXL,PRKCH,TMEM204,TRPV4,WTIP
GO:CC	extracellular space	GO:0005615	7.23823e-07	6.14037	1875	388	71	21265	ACE,ADAMTS5,ADM,AHNAK,ANXA1,AOC3,APOF,AQP1,ASPN,BMP2,BMP4,CCL2,CCL7,CMTM8,COL1A2,COL3A1,COL5A2,COL8A1,COL8A2,CP,CTGF,CTLA2A,CXADR,DPEP1,EDN1,EGFL7,ENPP2,F5,FGFBP1,FN1,GPRC5B,HBA-A1,HBA-A2,HBB-B1,IGF1,IGFBP3,IGFBP6,IGFBP7,IL18BP,IL34,KL,KRT18,LAMA1,LBP,LOX,LRRC32,LSR,MGP,MMRN2,NOV,OGN,PAM,PECAM1,PF4,POSTN,PROCR,PTGDS,PTGIS,RBP4,SEMA3C,SEMA3F,SEMA3G,SERPINB1B,SOSTDC1,SRGN,THBS1,TINAGL1,TNFSF10,TTR,…
GO:CC	cell periphery	GO:0071944	8.37033e-06	5.07726	6480	388	169	21265	ABCA4,ABCC9,ACE,ACTG2,ACVRL1,ADAP2,ADH1,AHNAK,AKAP12,ALOX12,ANXA1,AOC3,AQP1,ARL4A,ATP11C,BCAM,BMP2,BMX,CAR14,CD24A,CD34,CD74,CD93,CDC42EP3,CDH3,CDH5,CHL1,CISH,CLDN1,CLDN11,CLDN2,CLDN5,CLEC14A,CLIC6,CP,CRB3,CTGF,CXADR,DES,DPEP1,EEA1,EMB,EMCN,EMP3,ENPP2,EPHA4,EPN3,EPS8L1,EPS8L2,ESAM,EXOC3L,F11R,FGD5,FGFBP1,FLT1,FN1,FOLR1,GALR1,GFRA2,GJA4,GJC1,GPR20,GPR4,GPRC5B,GRB7,GSTM2,HEG1,HMCN1,HSPB1,HTR2C,IFIT…
GO:CC	plasma membrane	GO:0005886	9.89623e-06	5.00453	6344	388	166	21265	ABCA4,ABCC9,ACE,ACVRL1,ADAP2,ADH1,AHNAK,AKAP12,ALOX12,ANXA1,AOC3,AQP1,ARL4A,ATP11C,BCAM,BMP2,BMX,CAR14,CD24A,CD34,CD74,CD93,CDC42EP3,CDH3,CDH5,CHL1,CISH,CLDN1,CLDN11,CLDN2,CLDN5,CLEC14A,CLIC6,CP,CRB3,CXADR,DES,DPEP1,EEA1,EMB,EMCN,EMP3,ENPP2,EPHA4,EPN3,EPS8L1,EPS8L2,ESAM,F11R,FGD5,FGFBP1,FLT1,FN1,FOLR1,GALR1,GFRA2,GJA4,GJC1,GPR20,GPR4,GPRC5B,GRB7,GSTM2,HEG1,HMCN1,HSPB1,HTR2C,IFITM1,IGF1,IL17RE,IQG…
GO:CC	actin cytoskeleton	GO:0015629	0.000368479	3.43359	488	388	26	21265	ACTA2,ACTG2,AHNAK,ANXA1,CDC42EP3,CGNL1,CLDN5,CNN2,FLT1,HSPB7,IQGAP1,LMOD1,MYADM,MYH11,MYLK,MYO1B,MYO1D,MYO5C,NEXN,ONECUT2,SYNPO2,TPM1,TPM2,TPM3,TRPV4,UTRN
GO:CC	cell surface	GO:0009986	0.00168918	2.77233	1065	388	41	21265	ACE,ACVRL1,ANXA1,AOC3,BCAM,BMP2,CD200,CD24A,CD34,CD74,CD93,CDH5,CLEC14A,EGFL7,EGFL8,EPHA4,FGFBP1,FOLR1,GFRA2,GPRC5B,HEG1,HTR2C,ITGA3,KCNE2,KRT18,LBP,LRRC32,LY6A,LY6C1,LY75,MRC1,NOTCH4,P2RX1,PAM,PECAM1,PRLR,ROBO4,SLC7A11,THBS1,TRPV4,WNT6
GO:CC	plasma membrane region	GO:0098590	0.00172798	2.76246	1298	388	47	21265	ACE,ANXA1,AQP1,BMX,CD24A,CD34,CLDN1,CLDN5,CRB3,CXADR,DPEP1,EPHA4,EPN3,EPS8L1,EPS8L2,FN1,FOLR1,HMCN1,HSPB1,ITGA3,ITPR1,KCNE4,KCNQ1,KIRREL,KL,KRT8,MAL,MYLK,MYO1D,MYOF,NOS3,P2RX1,PODXL,PTGIS,SLC12A2,SLC16A8,SLC39A4,SLC4A5,SLC6A6,SLC7A11,SLC9A3R2,SYNE2,THEM4,TPM1,TPM3,TRPV4,UTRN
GO:CC	actin-based cell projection	GO:0098858	0.00296872	2.52743	241	388	16	21265	ACTA2,ACTG2,AOC3,CD24A,CXADR,DPEP1,EPHA4,EPS8L2,ITGA3,MYO1B,MYO1D,PODXL,SLC6A6,SYNE2,TRPV4,UTRN
GO:CC	contractile fiber	GO:0043292	0.00383713	2.41599	246	388	16	21265	ABCC9,ACTA2,AHNAK,DES,HSPB1,IGFN1,JPH2,KCNJ8,KRT8,LMOD1,NEXN,PECAM1,SYNE2,SYNPO2,TPM1,TPM2
GO:CC	apical part of cell	GO:0045177	0.00620231	2.20745	471	388	23	21265	ANXA1,AQP1,CD34,CHL1,CLDN1,CRB3,DPEP1,FN1,FOLR1,KCNE4,KL,MAL,MYO1B,NOS3,PODXL,SLC12A2,SLC16A8,SLC39A4,SLC4A5,SLC6A6,SLC7A11,SLC9A3R2,TRPV4
GO:CC	cell junction	GO:0030054	0.00627742	2.20222	2034	388	63	21265	AHNAK,AKAP12,ANXA1,AQP1,CCL2,CD24A,CDH3,CDH5,CLDN1,CLDN11,CLDN2,CLDN5,CRB3,CXADR,DES,DPEP1,EIF4EBP2,EMB,EPHA4,ESAM,F11R,GJA4,GJC1,GRB7,HEG1,HMCN1,HSPB1,HTR2C,IGFN1,IQGAP1,ITGA3,ITPR1,KIRREL,KRT8,LAMA1,LIMS2,LSR,LY6A,LY6C1,MAPK15,MYADM,MYLK,NEXN,NOV,P2RX1,PECAM1,PERP,PHLDB2,PODXL,POSTN,PRKCH,SEMA3F,SNCG,SYNE2,SYNPO2,THSD1,TMEM204,TNS1,TNS4,TRPV4,UTRN,WTIP,XIRP1
GO:CC	hemoglobin complex	GO:0005833	0.00629005	2.20135	10	388	4	21265	HBA-A1,HBA-A2,HBB-B1,HBB-Y
GO:CC	platelet alpha granule	GO:0031091	0.00729854	2.13676	20	388	5	21265	F5,IGF1,IGFBP3,PF4,THBS1
GO:CC	cell projection membrane	GO:0031253	0.00881334	2.05486	353	388	19	21265	ACE,AQP1,BMX,CD24A,DPEP1,EPS8L1,EPS8L2,FOLR1,ITGA3,KIRREL,MYO1D,PODXL,SLC6A6,SLC7A11,SYNE2,THEM4,TPM1,TRPV4,UTRN
GO:CC	filopodium	GO:0030175	0.0118219	1.92731	112	388	10	21265	ACTA2,ACTG2,CXADR,EPHA4,ITGA3,MYO1B,PODXL,SYNE2,TRPV4,UTRN
GO:CC	intrinsic component of plasma membrane	GO:0031226	0.0150215	1.82329	1538	388	50	21265	ABCA4,ABCC9,ACVRL1,AQP1,BCAM,BMP2,CD24A,CD74,CLDN1,CLDN11,CP,EMB,ENPP2,EPHA4,FLT1,FOLR1,GALR1,GPR20,GPR4,HTR2C,ITGA10,ITGA3,KCNE2,KCNE4,KCNJ8,KCNQ1,NCF2,OPN3,P2RX1,PAM,PCDH18,PCDHB19,PECAM1,PERP,PRMT8,SEMA3C,SEMA3F,SEMA3G,SGMS2,SLC16A4,SLC16A8,SLC39A4,SLC6A6,STRA6,TGM2,TIE1,TM4SF1,TMEM150A,TMPRSS11A,TRPV4
GO:CC	insulin-like growth factor binding protein complex	GO:0016942	0.0175621	1.75542	5	388	3	21265	IGF1,IGFBP3,IGFBP6
GO:CC	growth factor complex	GO:0036454	0.0175621	1.75542	5	388	3	21265	IGF1,IGFBP3,IGFBP6
GO:CC	secretory granule	GO:0030141	0.0183267	1.73691	405	388	20	21265	ABCC9,AQP1,CAPN11,CXADR,EDN1,EXOC3L,F5,IGF1,IGFBP3,ITPR1,KCNQ1,MYO5C,NCF2,PAM,PF4,SRGN,TCTEX1D4,THBS1,TMEM184A,VWF
GO:CC	tight junction	GO:0070160	0.023526	1.62845	146	388	11	21265	CDH5,CLDN1,CLDN11,CLDN2,CLDN5,CRB3,CXADR,ESAM,F11R,LSR,MAPK15
GO:CC	apical plasma membrane	GO:0016324	0.027184	1.56569	384	388	19	21265	ANXA1,AQP1,CD34,CLDN1,CRB3,DPEP1,FN1,FOLR1,KCNE4,KL,MAL,PODXL,SLC12A2,SLC16A8,SLC39A4,SLC4A5,SLC6A6,SLC9A3R2,TRPV4
GO:CC	basal part of cell	GO:0045178	0.0315549	1.50093	80	388	8	21265	ACE,AQP1,CD34,CLDN11,EDN1,PHLDB2,SLC12A2,SLC16A8
GO:CC	myofibril	GO:0030016	0.034074	1.46758	235	388	14	21265	ABCC9,AHNAK,DES,HSPB1,IGFN1,JPH2,KCNJ8,KRT8,LMOD1,NEXN,SYNE2,SYNPO2,TPM1,TPM2
GO:CC	membrane raft	GO:0045121	0.0392523	1.40613	395	388	19	21265	AHNAK,AQP1,CD24A,CXADR,GPRC5B,IQGAP1,ITPR1,KCNQ1,KIRREL,MAL,MYADM,MYO1D,MYOF,NOS3,P2RX1,PECAM1,PODXL,PTGIS,S100A10
GO:CC	membrane microdomain	GO:0098857	0.0405539	1.39197	396	388	19	21265	AHNAK,AQP1,CD24A,CXADR,GPRC5B,IQGAP1,ITPR1,KCNQ1,KIRREL,MAL,MYADM,MYO1D,MYOF,NOS3,P2RX1,PECAM1,PODXL,PTGIS,S100A10
GO:CC	focal adhesion	GO:0005925	0.0405593	1.39191	182	388	12	21265	GRB7,IQGAP1,LIMS2,NEXN,PHLDB2,SYNE2,SYNPO2,THSD1,TNS1,TNS4,TRPV4,WTIP
