# Supplementary material for: Transcriptional regulation of neural stem cell expansion in the adult hippocampus
Source: eLife. 2022 Jan 4;11:e72195. doi: 10.7554/eLife.72195 (PMC8820733; doi:10.7554/eLife.72195)
Supplement: Supplementary file 4. [file elife-72195-supp4.xlsx]

## Sheet: Figure 1
Figure 1A	Ordinary One-Way ANOVA
	F	17.07
	P value	0.0033
	P value summary	**
	Significant diff. among means (P < 0.05)?	Yes
	R square	0.8505
Figure 1C	Ordinary One-Way ANOVA
	F	5.614
	P value	0.0422
	P value summary	*
	Significant diff. among means (P < 0.05)?	Yes
	R square	0.6517
Figure 1G	Unpaired t test
	P value	<0.0001
	P value summary	****
	Significantly different (P < 0.05)?	Yes
	One- or two-tailed P value?	Two-tailed
	t, df	t=15.54, df=5

## Sheet: Figure 2
Figure 2B	Ordinary Two-way ANOVA
	Source of Variation	% of total variation	P value	P value summary	Significant
	Interaction	25	<0.0001	****	Yes
	Clone types	69.17	<0.0001	****	Yes
	Klf9+/+ vs Klf9f/f	2.702e-20	>0.9999	ns	No
	Bonferroni's multiple comparisons test	Mean Diff.	95.00% CI of diff.	Significant	Summary	Adjusted P Value
	Klf9+/+ vs Klf9f/f
	1 RGL	1.155	-9.981 to 12.29	No	ns	>0.9999
	2+ RGLs	-31.34	-42.47 to -20.20	Yes	****	<0.0001
	1 RGL + ASTRO + PROG	27.54	16.40 to 38.68	Yes	****	<0.0001
	No RGL	2.64	-8.496 to 13.78	No	ns	>0.9999
Figure 2D left	Ordinary Two-way ANOVA
	Source of Variation	% of total variation	P value	P value summary	Significant?
	Interaction	21.65	<0.0001	****	Yes
	Clone types	41.27	<0.0001	****	Yes
	Klf9+/+ vs Klf9f/f	24.93	<0.0001	****	Yes
	Bonferroni's multiple comparisons test	Mean Diff.	95.00% CI of diff.	Significant	Summary	Adjusted P Value
	Klf9+/+ vs Klf9f/f
	2 RGLs	-6.928	-14.78 to 0.9262	No	ns	0.0953
	2 RGLs + A + P	-23.73	-31.59 to -15.88	Yes	****	<0.0001
	2 RGLs + P	-0.6775	-8.532 to 7.177	No	ns	>0.9999
Figure 2D right	Ordinary Two-way ANOVA
	Source of Variation	% of total variation	P value	P value summary	Significant
	Interaction	4.828	0.0903	ns	No
	Clone types	66.92	<0.0001	****	Yes
	Klf9+/+ vs Klf9f/f	12.49	0.0014	**	Yes
	Bonferroni's multiple comparisons test	Mean Diff.	95.00% CI of diff.	Significant	Summary	Adjusted P Value
	Klf9+/+ vs Klf9f/f
	1 RGL	1.155	-10.42 to 12.74	No	ns	>0.9999
	1 RGL + A + P	13.9	2.320 to 25.48	Yes	*	0.016
	1 RGL + P	13.64	2.063 to 25.22	Yes	*	0.0182
Figure 2F	Ordinary Two-way ANOVA
	Source of Variation	% of total variation	P value	P value summary	Significant?
	Interaction	10.7	<0.0001	****	Yes
	Clone types	80.8	<0.0001	****	Yes
	Klf9+/+ vs Klf9f/f	5.326e-21	>0.9999	ns	No
	Bonferroni's multiple comparisons test	Mean Diff.	95.00% CI of diff.	Significant?	Summary	Adjusted P Value
	Klf9+/+ vs Klf9f/f
	1 RGL	2.151	-9.385 to 13.69	No	ns	>0.9999
	2+ RGLS	-21.45	-32.98 to -9.912	Yes	***	0.0001
	1 RGL+P+A	12.24	0.7091 to 23.78	Yes	*	0.0338
	NO RGLS	7.053	-4.483 to 18.59	No	ns	0.4554

## Sheet: Figure 3
Figure 3C
In order to compare differences in the modes of NSC division between the two genotypes, we used the R statistical analysis software to fit a generalized linear mixed effects (LME) model to the division numbers across different mice, using genotype as a fixed effect, and including animal identity as a random effect in order to account for differences between individual animals [DivisionType~Genoty…
Figure 3D	Unpaired t test
	P value	0.9064
	P value summary	ns
	Significantly different (P < 0.05)?	No
	One- or two-tailed P value?	Two-tailed
	t, df	t=0.1194, df=16

## Sheet: Figure 4
Figure 4D	Unpaired t test
	Pla2g7
	P value	0.0253
	P value summary	*
	Significantly different (P < 0.05)?	Yes
	One- or two-tailed P value?	Two-tailed
	t, df	t=3.484, df=4
	EFGR
	P value	0.0068
	P value summary	**
	Significantly different (P < 0.05)?	Yes
	One- or two-tailed P value?	Two-tailed
	t, df	t=5.142, df=4
	Lfng
	P value	0.0038
	P value summary	**
	Significantly different (P < 0.05)?	Yes
	One- or two-tailed P value?	Two-tailed
	t, df	t=6.027, df=4
	Ccn1a
	P value	0.0325
	P value summary	*
	Significantly different (P < 0.05)?	Yes
	One- or two-tailed P value?	Two-tailed
	t, df	t=3.212, df=4
	Klf9
	P value	0.0005
	P value summary	***
	Significantly different (P < 0.05)?	Yes
	One- or two-tailed P value?	Two-tailed
	t, df	t=10.31, df=4
	BMP4
	P value	0.0056
	P value summary	**
	Significantly different (P < 0.05)?	Yes
	One- or two-tailed P value?	Two-tailed
	t, df	t=5.434, df=4
Figure 4E	Unpaired t test
	P value	0.0342
	P value summary	*
	Significantly different (P < 0.05)?	Yes
	One- or two-tailed P value?	Two-tailed
	t, df	t=2.890, df=5

## Sheet: Figure 1-figure supplement 2
Panel C
	Unpaired t test
	P value	0.0241
	P value summary	*
	Significantly different (P < 0.05)?	Yes
	One- or two-tailed P value?	Two-tailed
	t, df	t=2.334, df=45

## Sheet: Figure 1-figure supplement 3
Panel B	Unpaired t test
	P value	0.0003
	P value summary	***
	Significantly different (P < 0.05)?	Yes
	One- or two-tailed P value?	Two-tailed
	t, df	t=6.183, df=8
Panel C	Unpaired t test
	P value	0.0058
	P value summary	**
	Significantly different (P < 0.05)?	Yes
	One- or two-tailed P value?	Two-tailed
	t, df	t=5.367, df=4
